# Supplementary material for: A chemical–genetic interaction map of small molecules using high‐throughput imaging in cancer cells
Source: PubMed Central journal article supplement (PMC4704494; doi:10.15252/msb.20156400), 2015-12-28
Supplement: MSB-11-846-s001.pdf [file MSB-11-846-s001.pdf]

## **Appendix.**

### **A chemical-genetic interaction map of small molecules using high-throughput imaging in cancer cells**

Breinig et al.

#### **Table of content:**

Appendix Figure S1: Quality control.

Appendix Figure S2: Phenotypic features.

Appendix Figure S3: Quantitative analysis of chemical-genetic interactions across multiple phenotypic features.

Appendix Figure S4: Significant multiparametric chemical-genetic interactions.

Appendix Figure S5: Strong main effects of gene KO and associations of isogenic cell lines.

Appendix Figure S6: Synthetic lethal pharmacogenetic interactions.

Appendix Figure S7: Bendamustine and disulfiram interaction spectrum.

Appendix Figure S8: Clustering of chemical-genetic interactions.

Appendix Figure S9: Association between clustering of compounds as shown in Fig 5A and respective interaction spectra for drugs within clusters.

Appendix Figure S10: Integration of phenotypic profiling and chemical-genetic interaction mapping improves resolution.

Appendix Figure S11: Image-based chemical-genetic interaction analyses outperforms other methods.

Appendix Figure S12: The EGFR inhibitor tyrphostin AG555 impairs proteasome function.

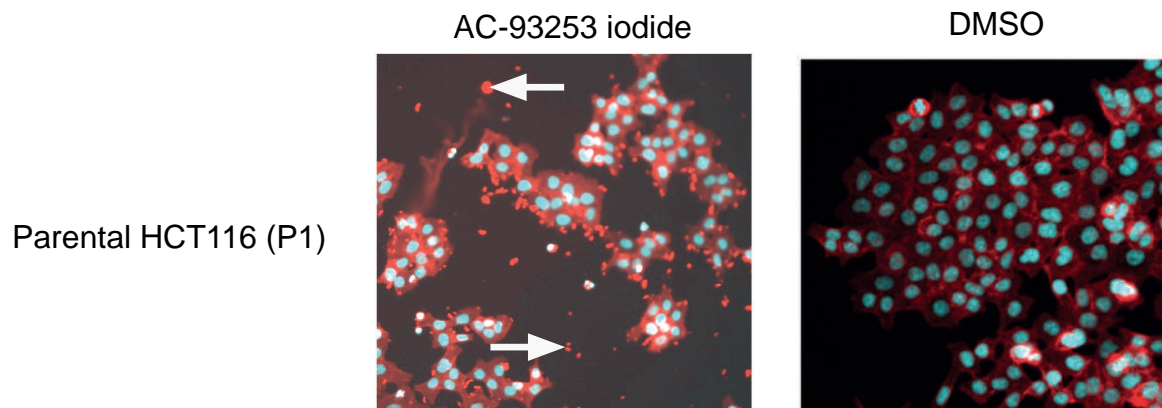

Appendix Figure S1. Quality control.

Images showing experimental artefact, such as autofluorescence of AC-93253 iodide, were removed from the analysis.

Here, a high fluorescence background and the occurrence of fluorescent speckles (arrows) can be seen in the TRITC channel used to detect actin via Phalloidin-TRITC staining.

Image of DMSO treated cells is included as a reference, showing low fluorescence background and specific actin staining.

**A**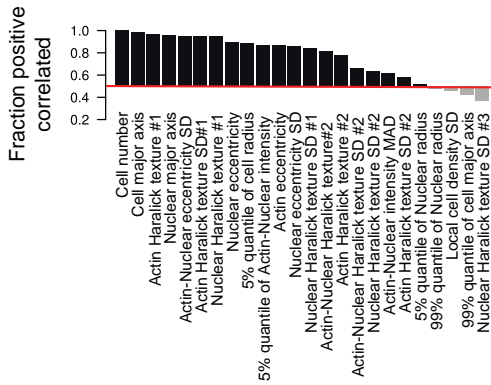**B**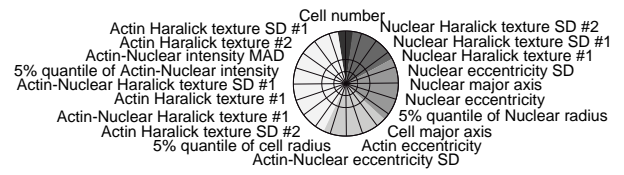**C**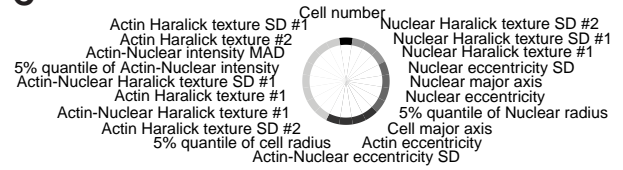

Appendix Figure S2. Phenotypic features.

A Feature names to Figure 1C. Linear decomposition selected a final set of 20 phenotypic features.

B Feature names to Figure 1D. Phenotypic features are grouped in 5 phenotypic categories and span phenoprints.

C Feature names to Figure 2 and 4. Phenotypic interactions for the selected 20 features are grouped in 5 phenotypic categories.

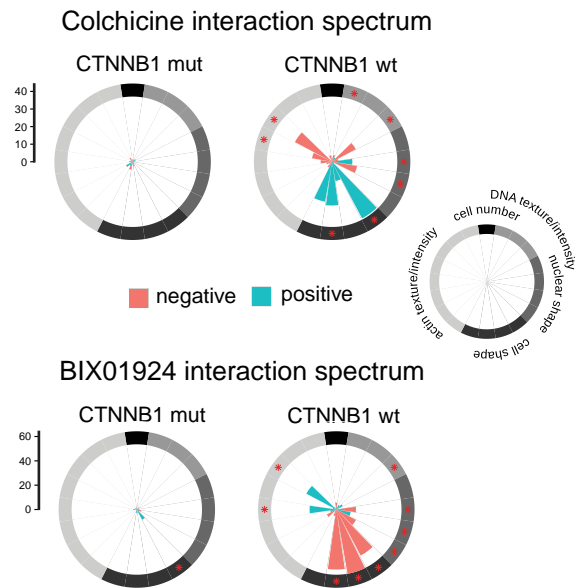

Appendix Figure S3. Quantitative analysis of chemical-genetic interactions across multiple phenotypic features.

Chemical-genetic interactions were calculated for all 20 phenotypic features as described.

Colchicine and BIX01294 show multiple interactions in CTNNB1 wt cells.

Phenotypic chemo-genomic interactions are shown unscaled.

Interactions are further categorized in positive and negative interactions according to the sign of interaction terms (see Material and Methods for details). \* adjusted p-value < 0.01.

1,10-Phenanthroline monohydrate

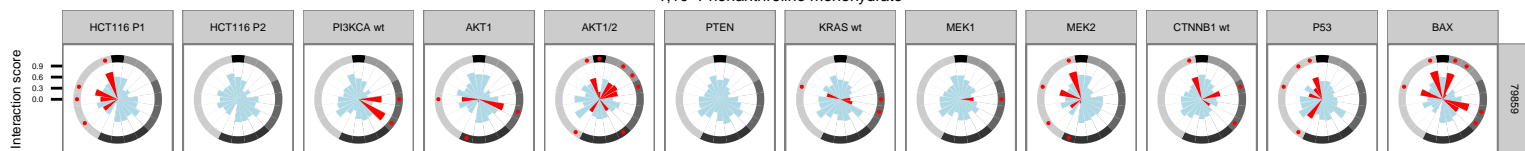

2,3-Butanedione monoxime

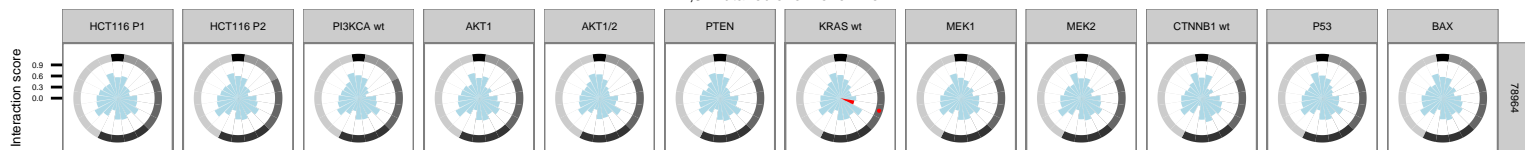

2,3-Dimethoxy-1,4-naphthoquinone

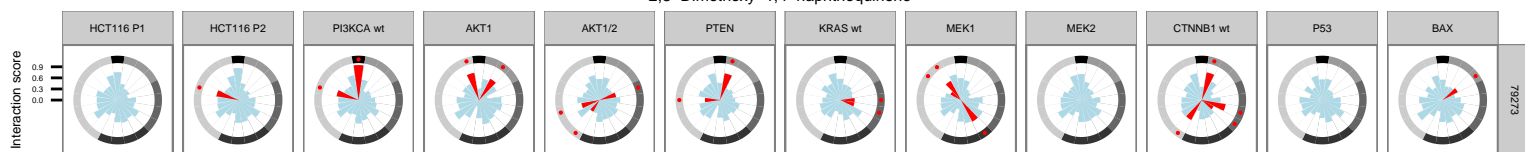

2-Chloroadenosine

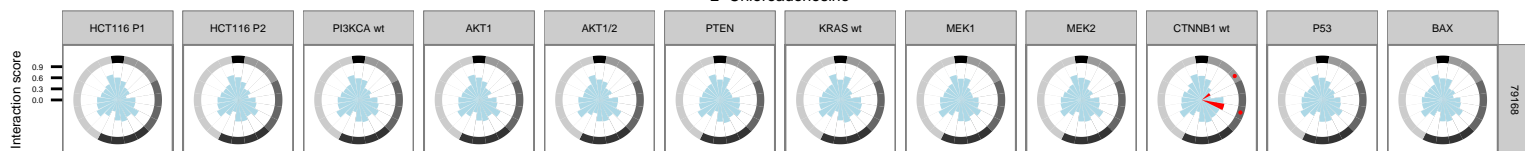

2-Chloroadenosine triphosphate tetrasodium

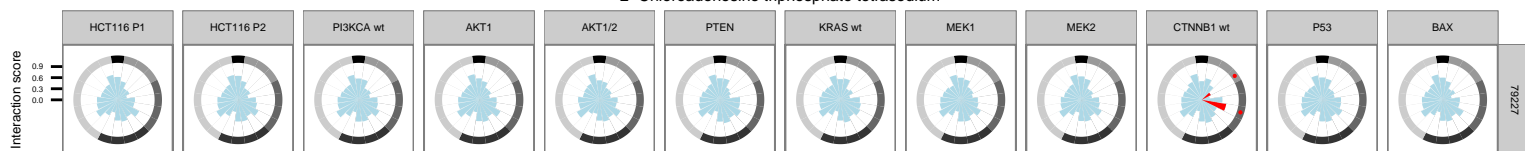

2-methoxyestradiol

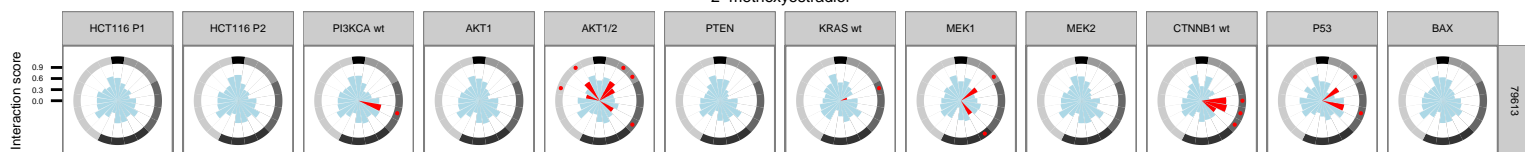

4-Imidazolemethanol hydrochloride

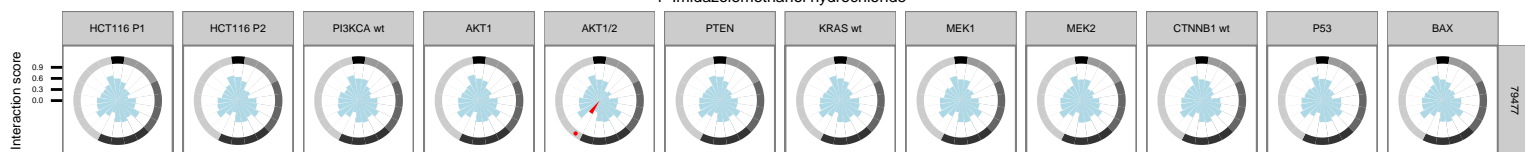

4-Methylpyrazole hydrochloride

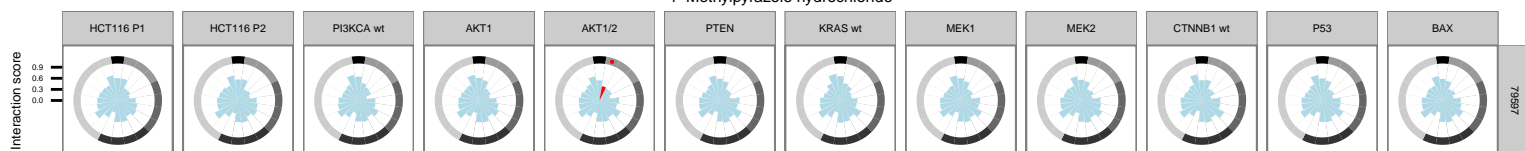

## 5-azacytidine

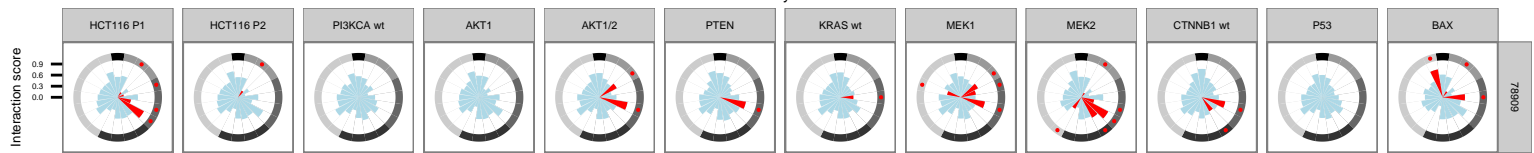

## 5-Bromo-2'-deoxyuridine

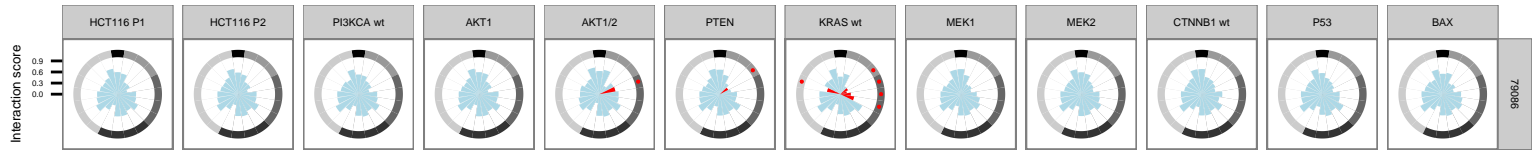

## 5-fluoro-5'-deoxyuridine

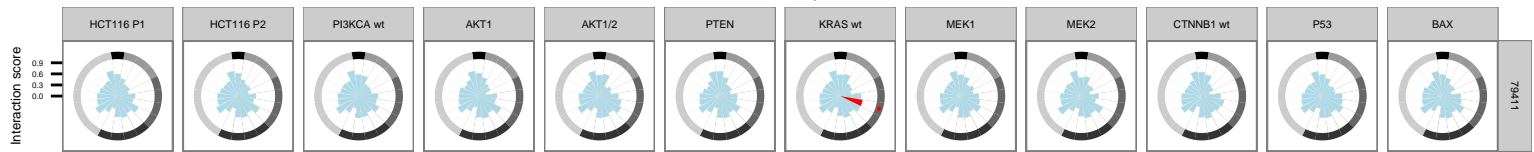

## 5-Fluorouracil

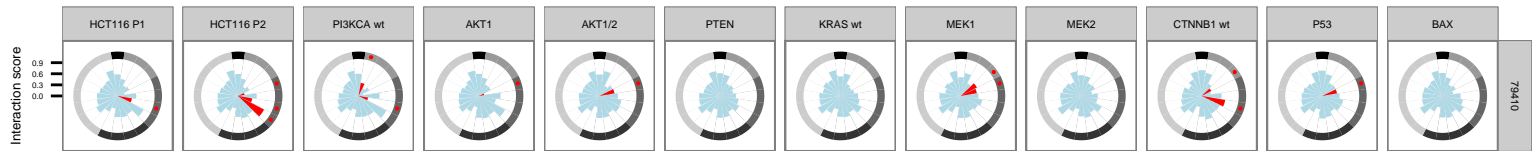

## 5-N-Ethylcarboxamidoadenosine

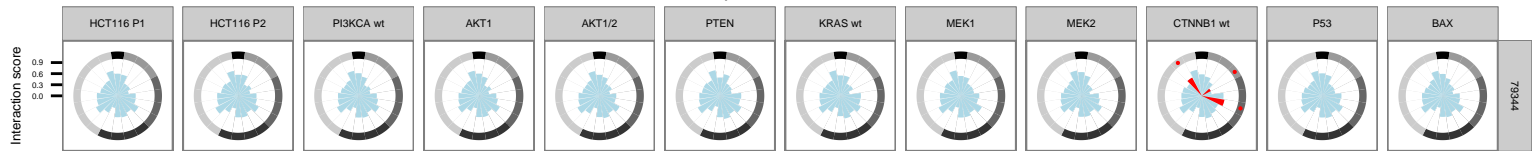

## 5-(N-Ethyl-N-isopropyl)amiloride

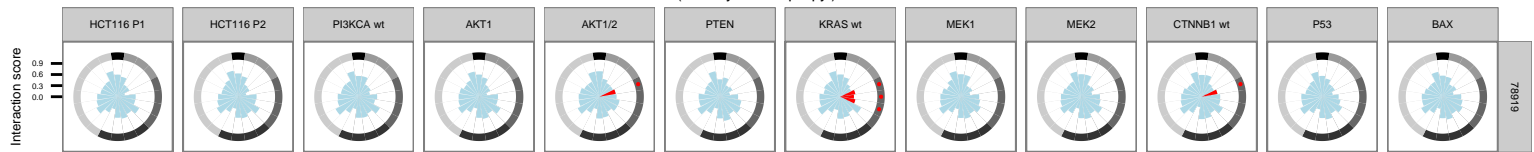

## 5-(N,N-hexamethylene)amiloride

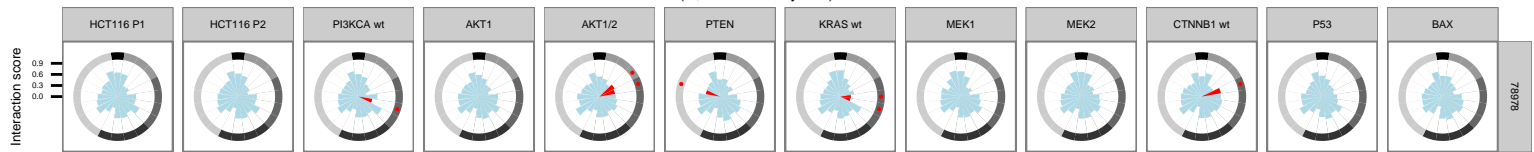

## 6-Methoxy-1,2,3,4-tetrahydro-9H-pyrido[3,4b] indole

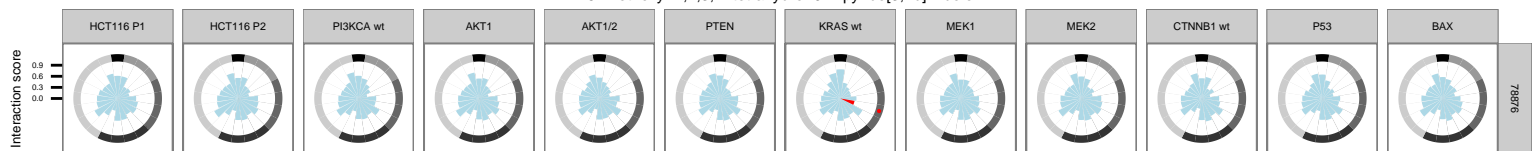

7-Cyclopentyl-5-(4-phenoxy)phenyl-7H-pyrrolo[2,3-d]pyrimidin-4-ylamine

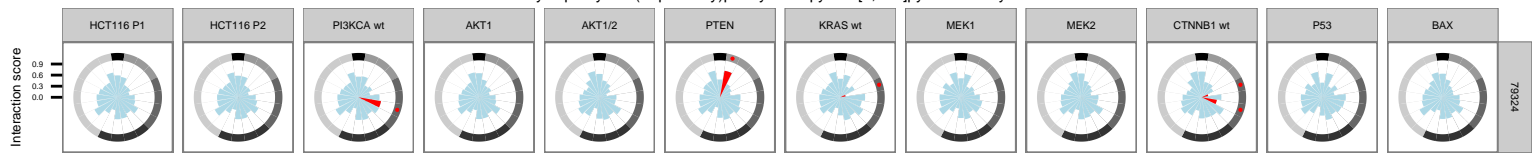

A-134974 dihydrochloride hydrate

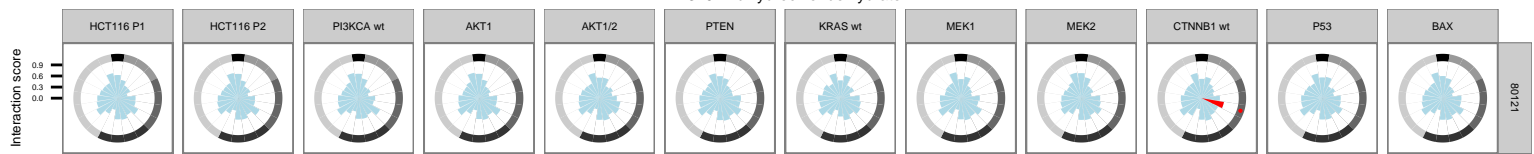

A-77636 hydrochloride

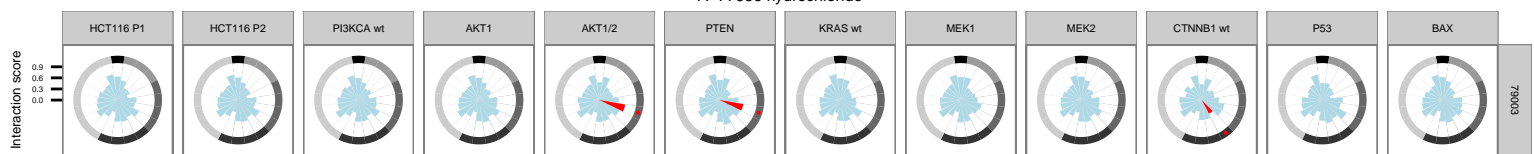

ABT-702 dihydrochloride

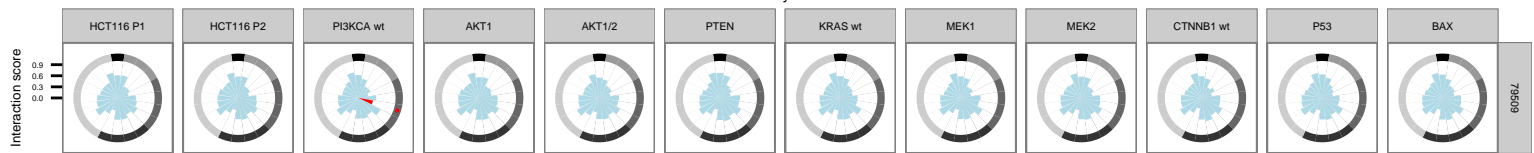

Actinonin

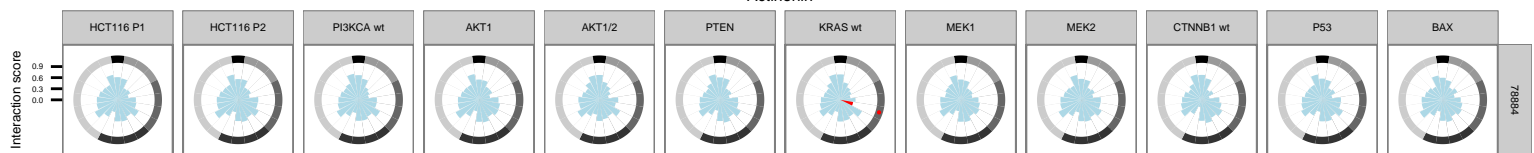

Aminopterin

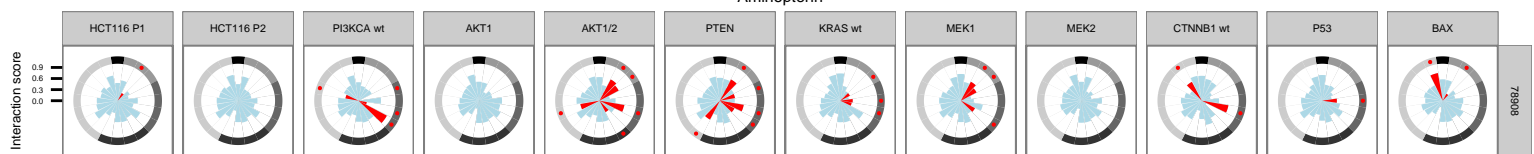

Ammonium pyrrolidinedithiocarbamate

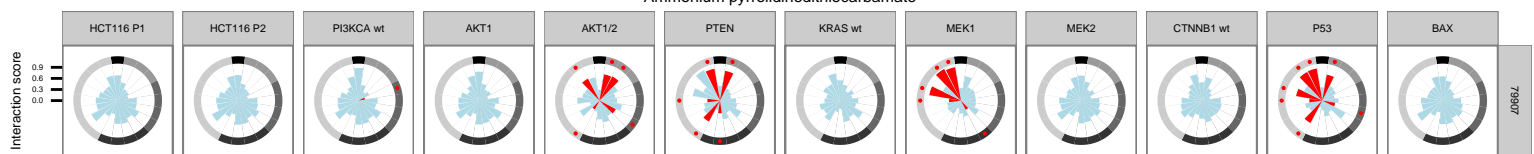

Amoxapine

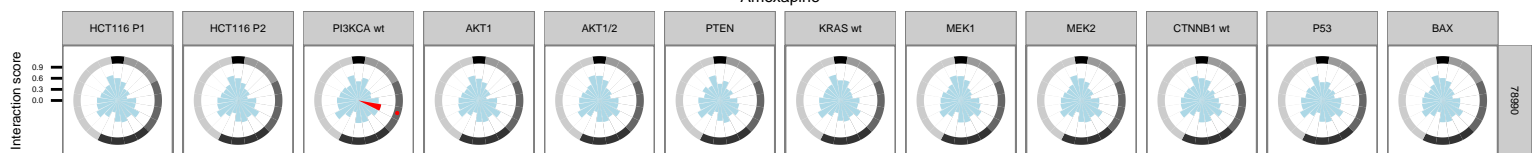

Amsacrine hydrochloride

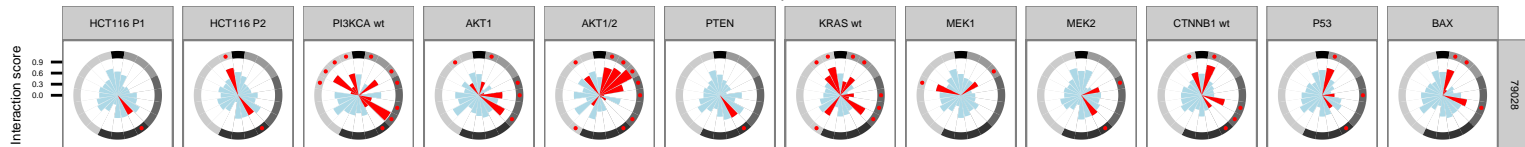

(+/-)-AMT hydrochloride

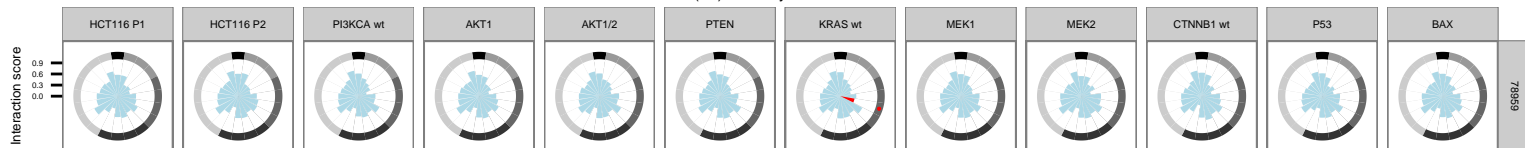

Ancitabine hydrochloride

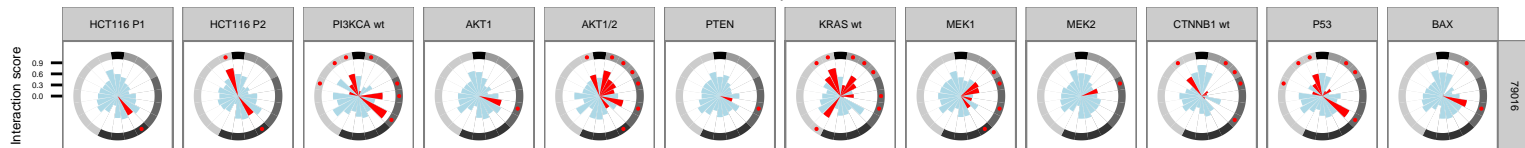

Anisotropine methyl bromide

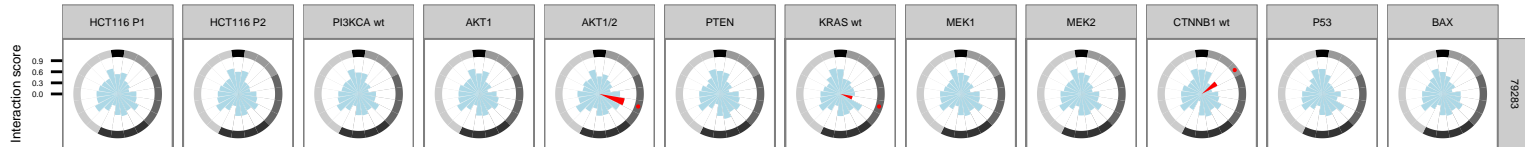

ARP 101

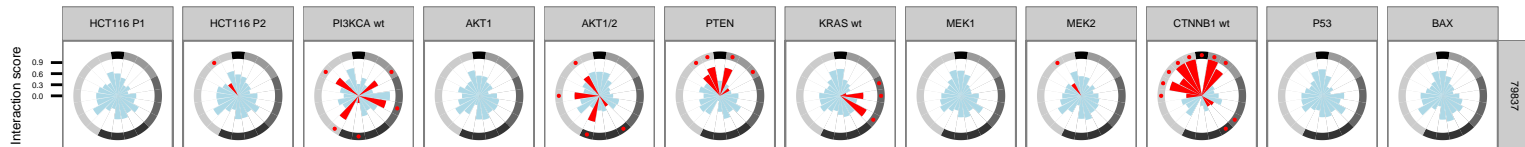

Auranofin

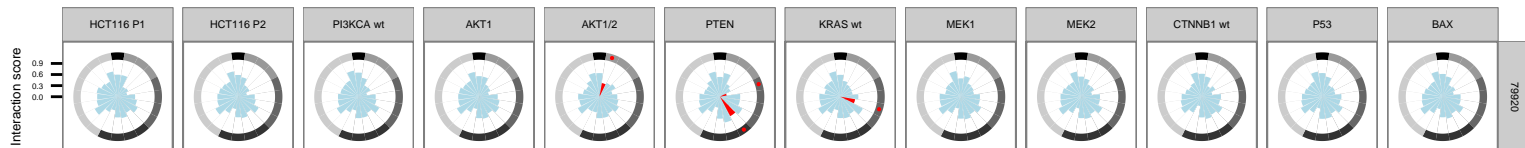

Aurothioglucose

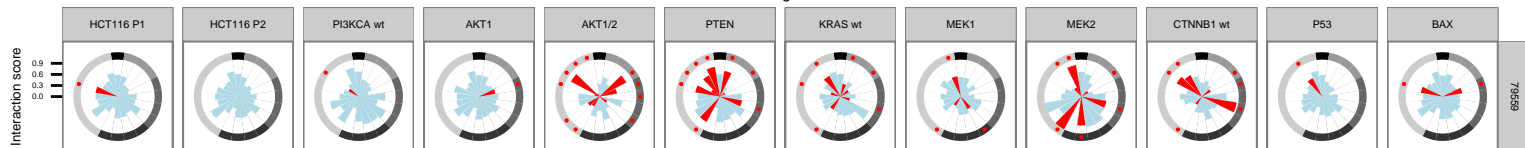

Azathioprine

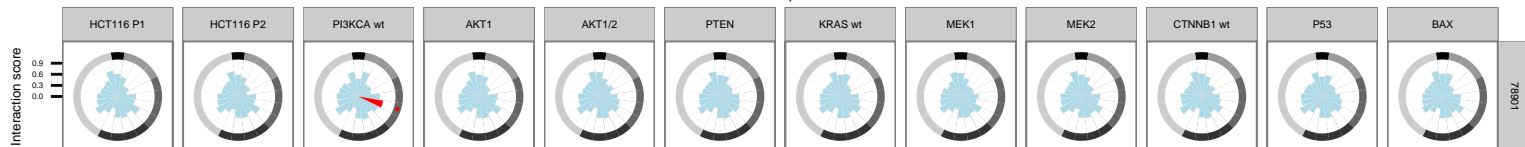



Bay 11-7082

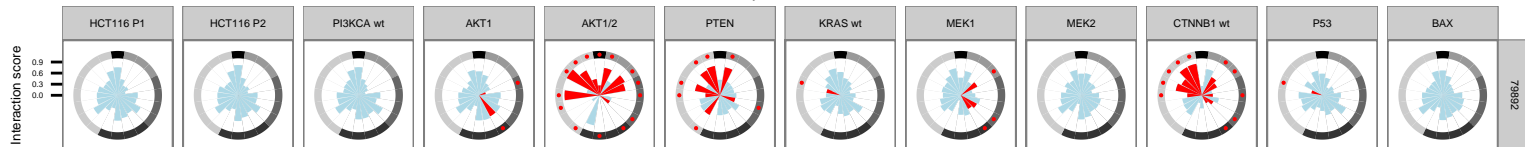

Bay 11-7085

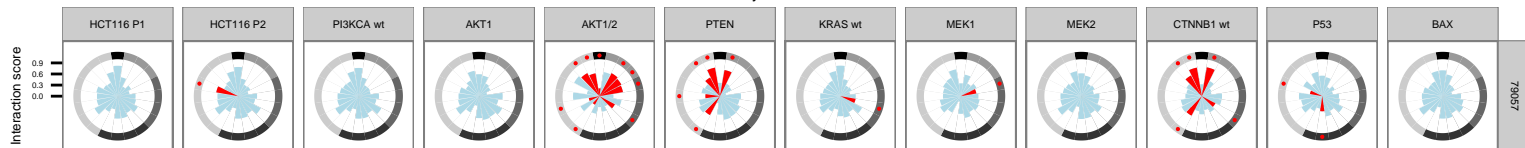

Beclomethasone

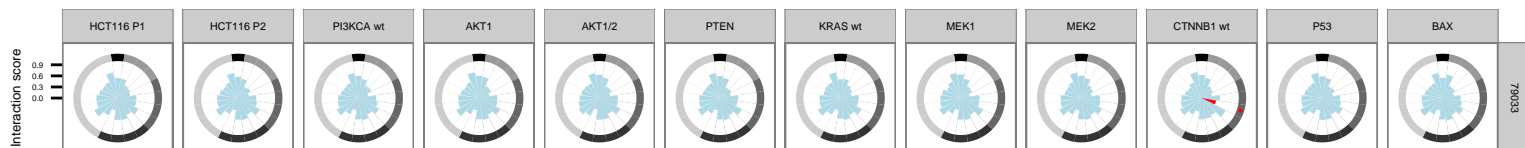

Bendamustine hydrochloride

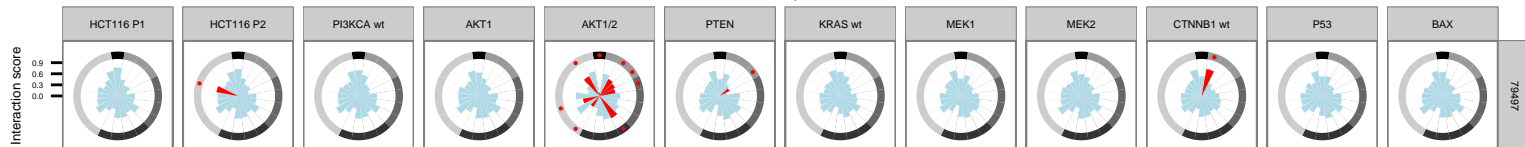

Benoxathian hydrochloride

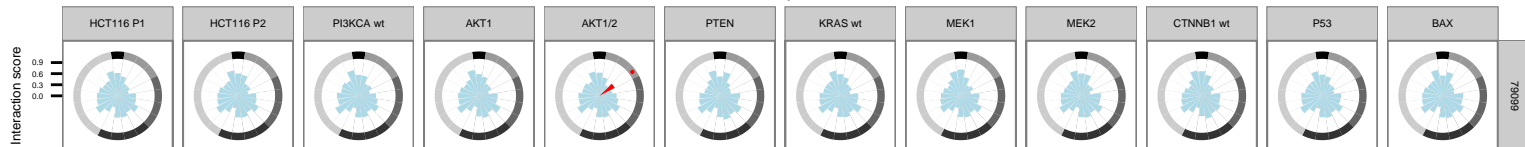

Benztropine mesylate

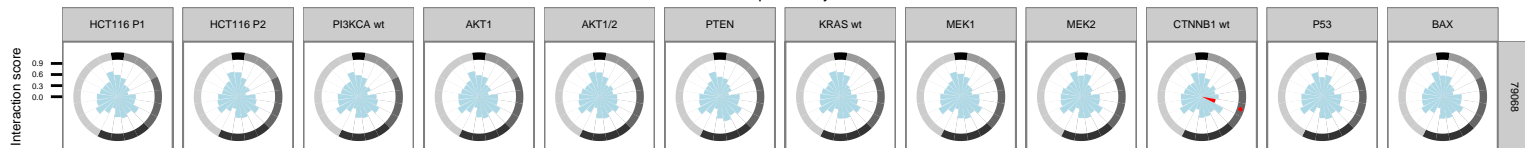

beta-Chloro-L-alanine hydrochloride

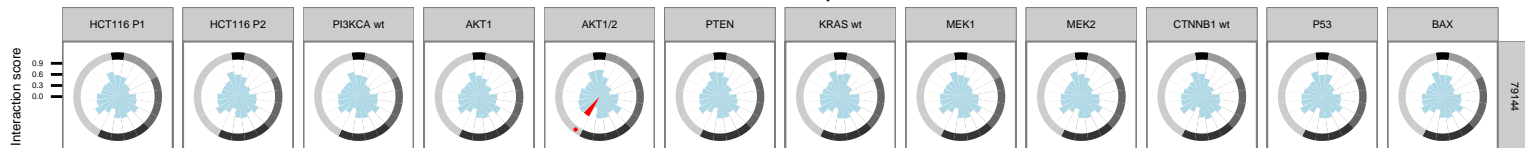

beta-Lapachone

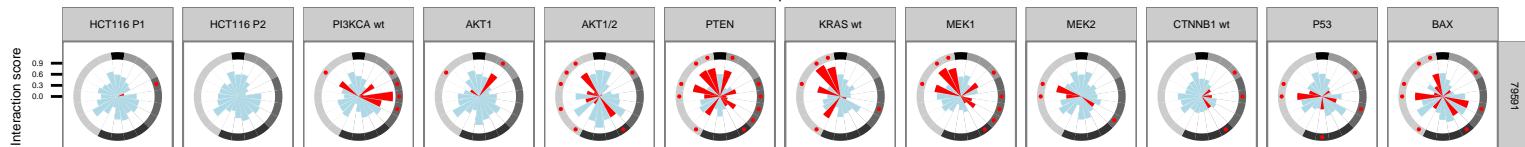

Betamethasone

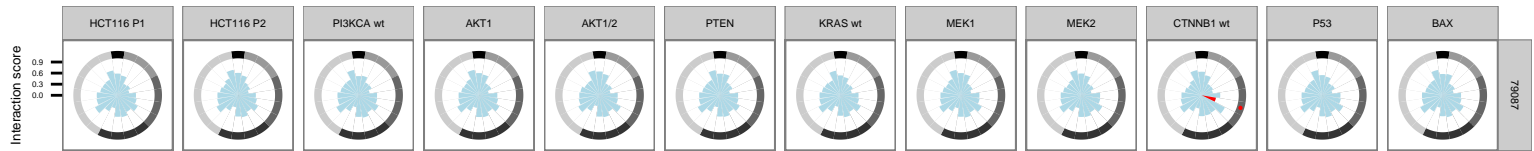

BIO

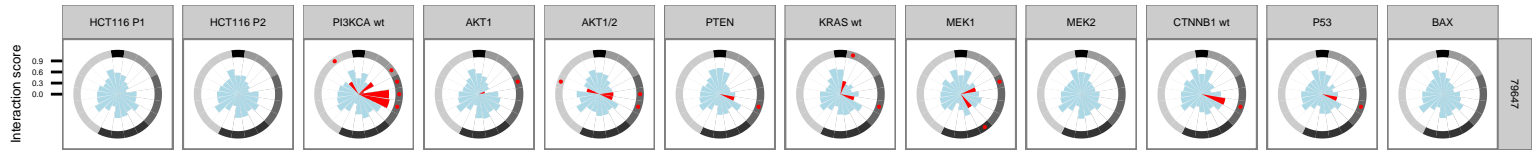

Bisoprolol hemifumarate salt

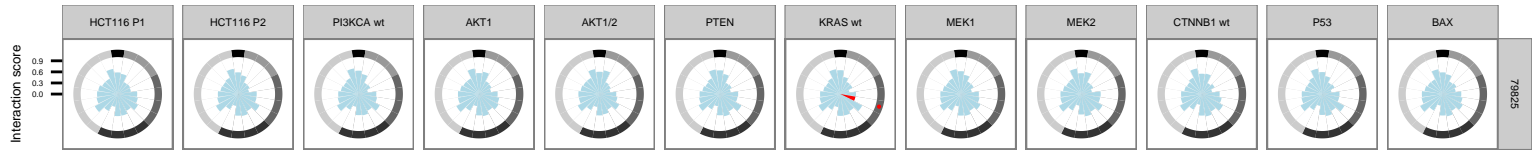

BIX 01294 trihydrochloride hydrate

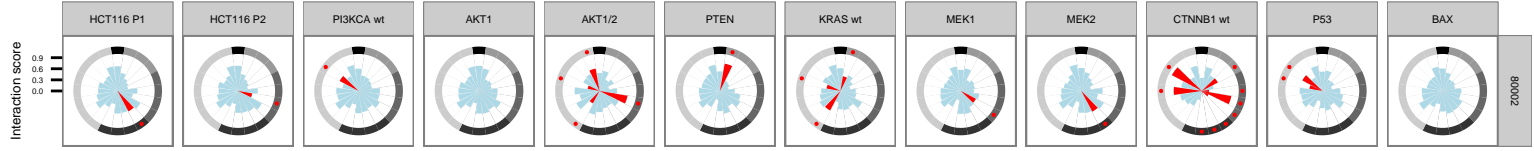

BNTX maleate salt hydrate

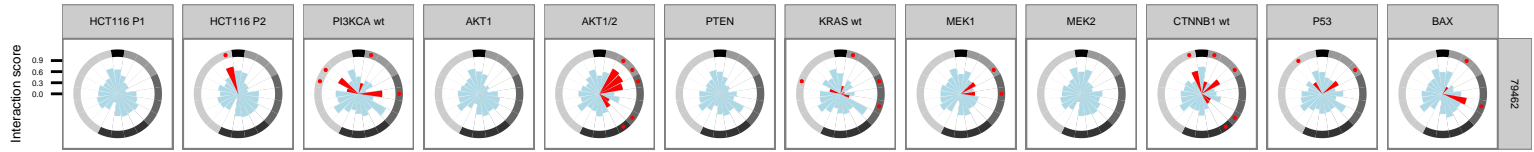

Brefeldin A from Penicillium brefeldianum

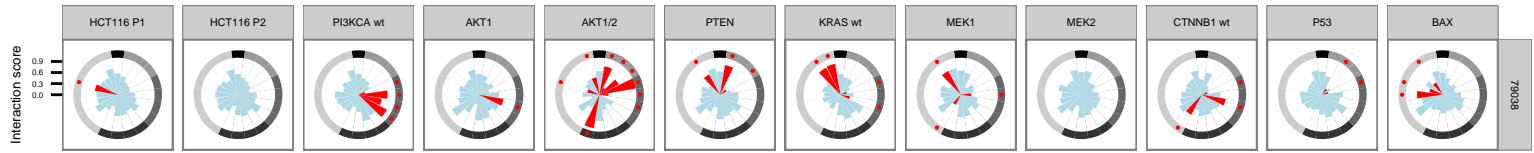

Bromoacetyl alprenolol menthane

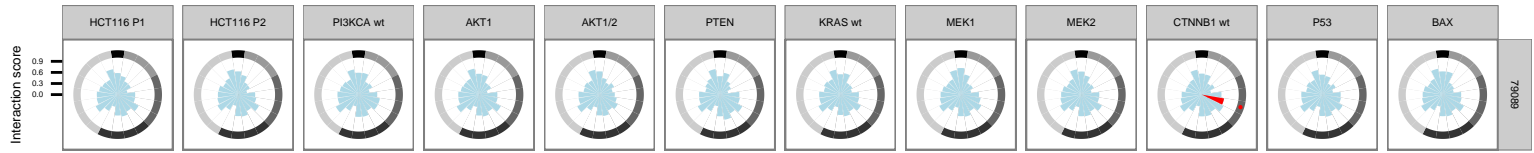

(+)-Bromocriptine methanesulfonate

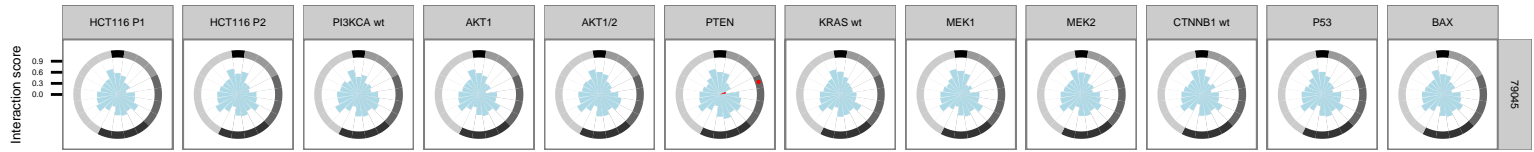

(+)-Brompheniramine maleate

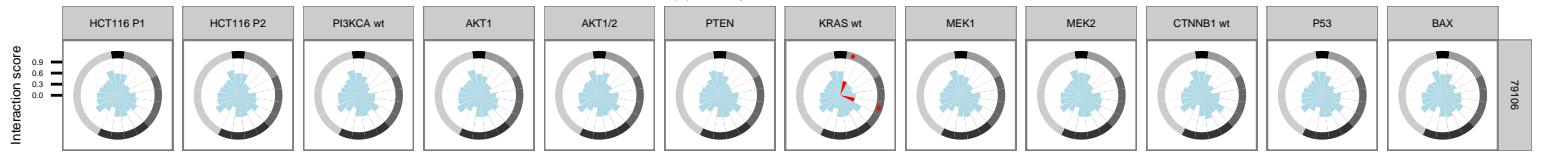

BTO-1

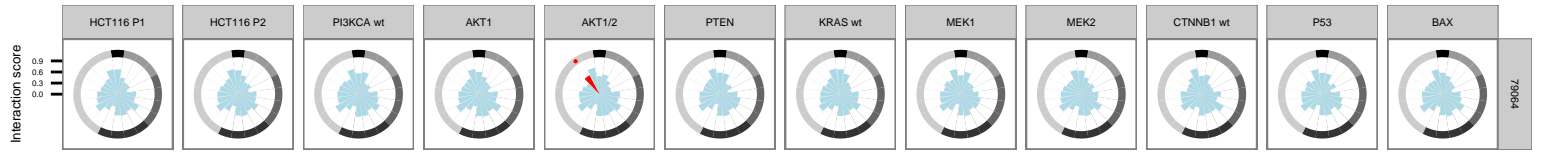

Budesonide

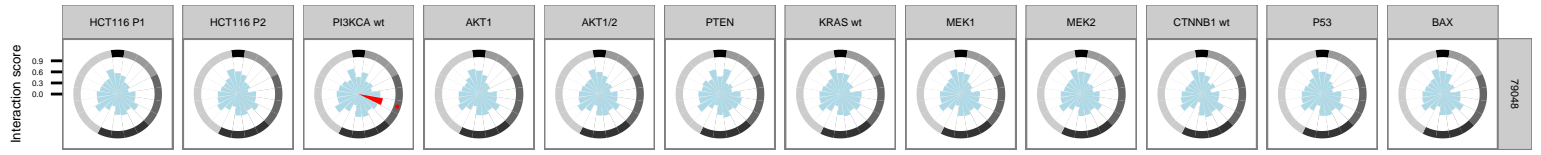

(+)-Butaclamol hydrochloride

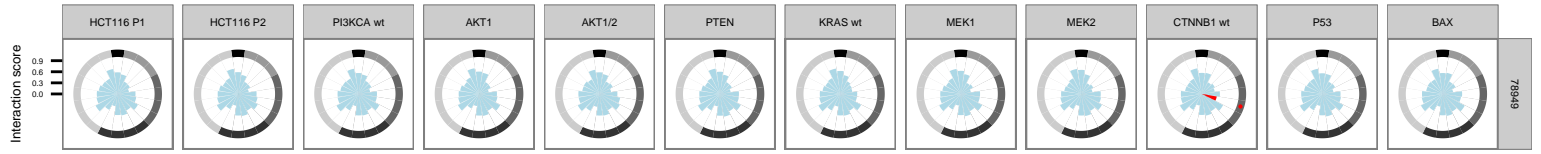

Caffeic acid phenethyl ester

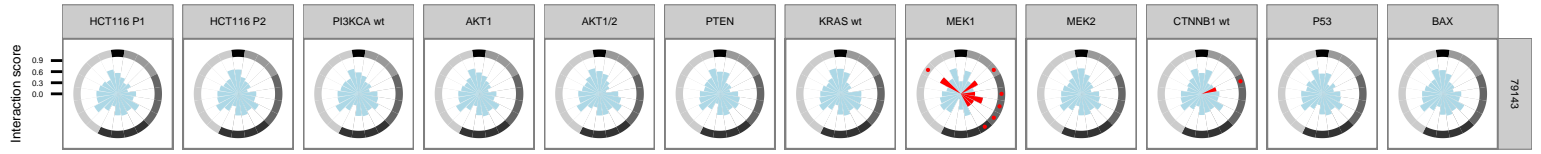

Calcimycin

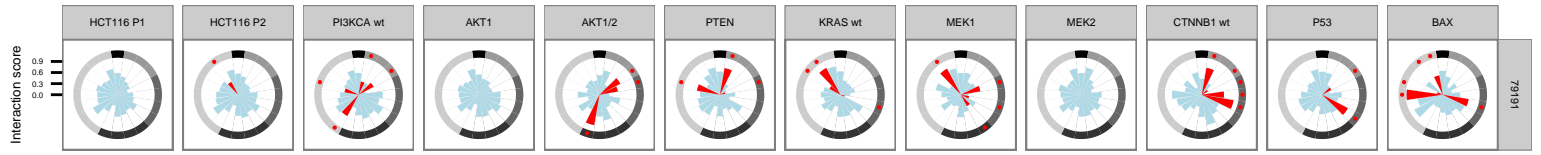

Cantharidic Acid

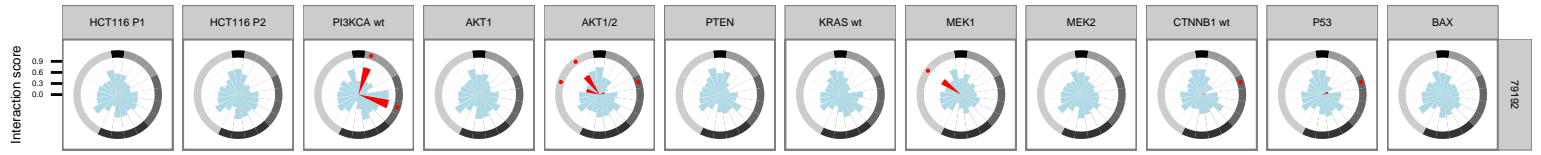

Cantharidin

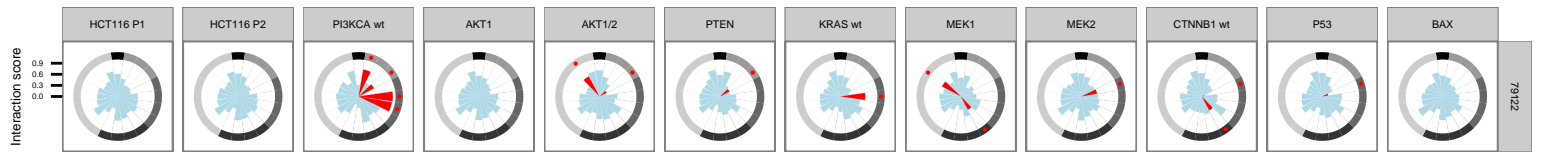

Capsazepine

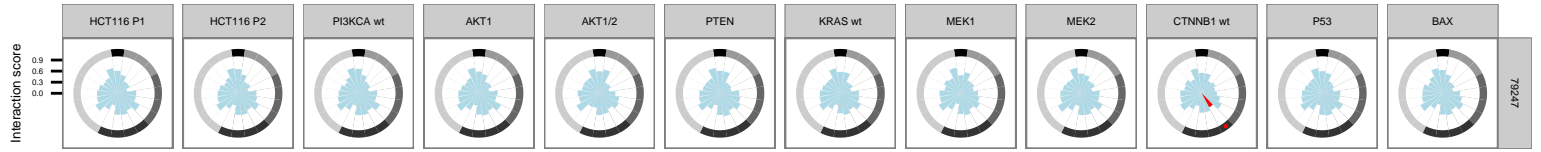

Carboplatin

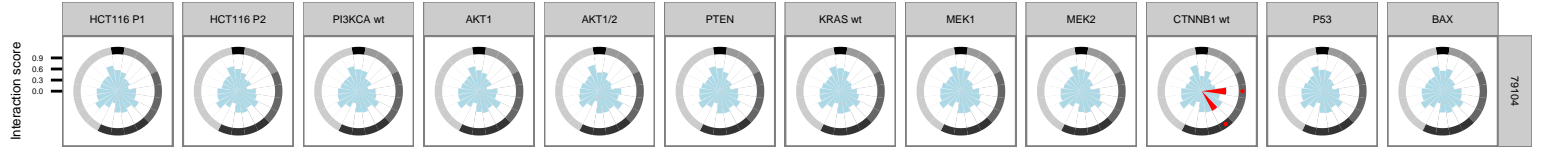

Carvedilol

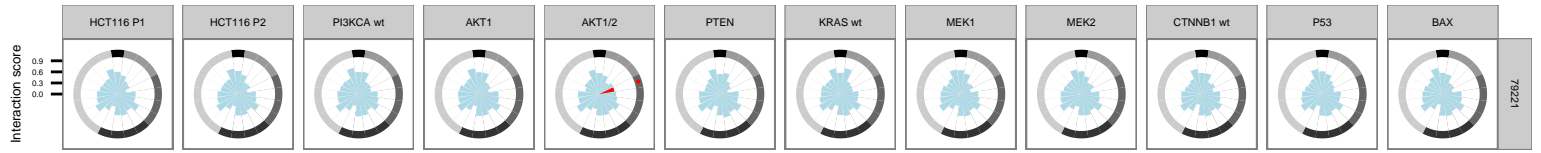

CB 1954

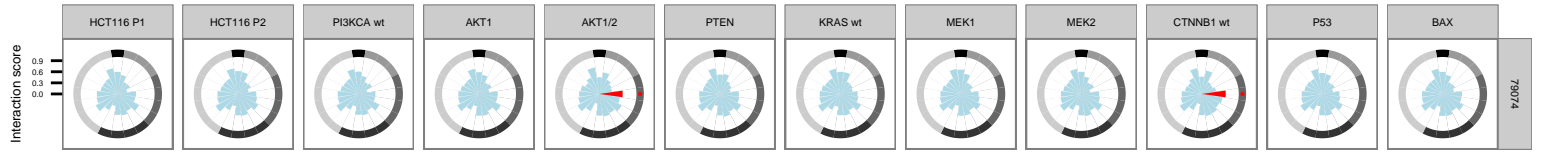

CGP 57380

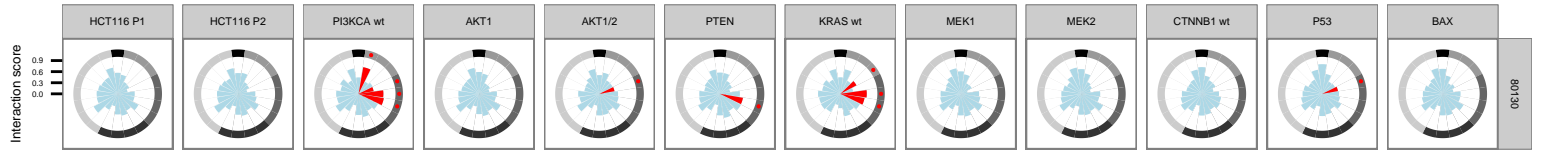

CGP-74514A hydrochloride

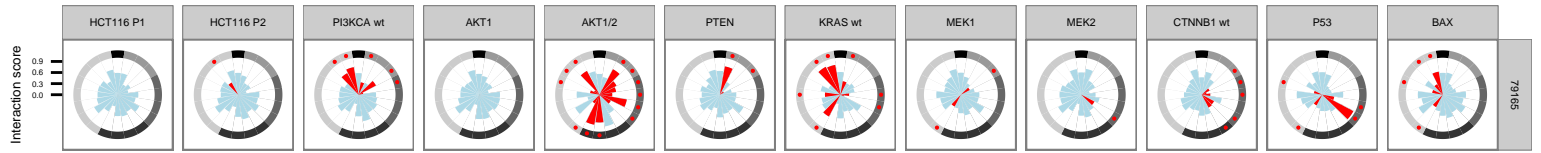

CGS-15943

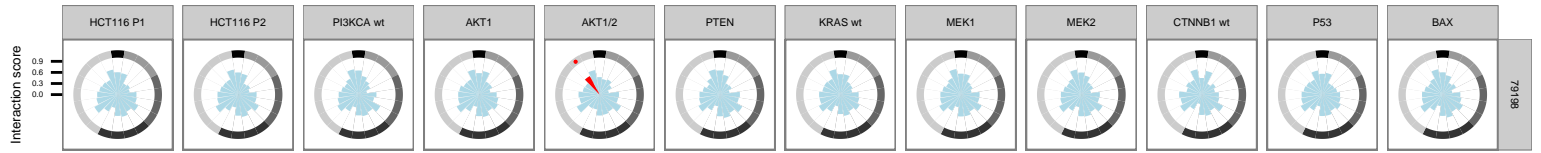

(+)-Chloro-APB hydrobromide

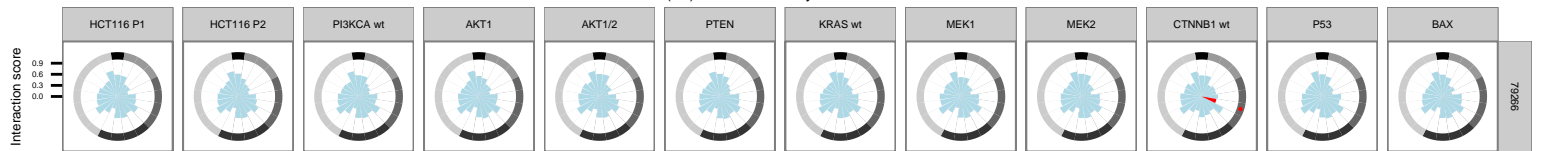

CHM-1 hydrate

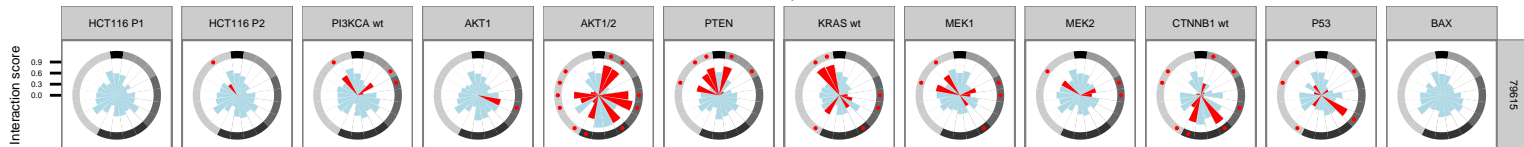

cis-Azetidine-2,4-dicarboxylic acid

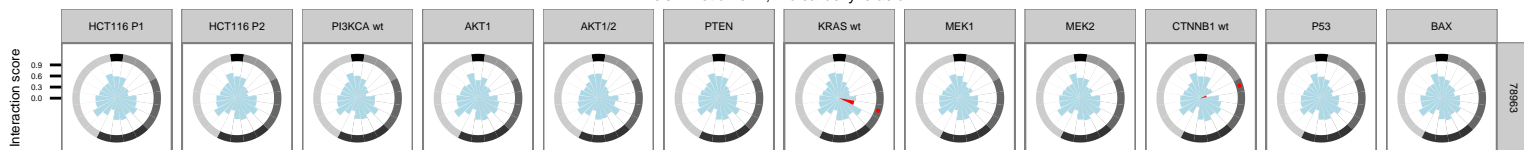

CK2 Inhibitor 2

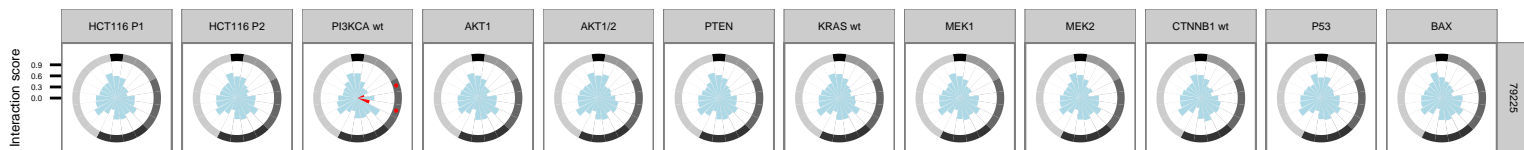

Clemastine fumarate

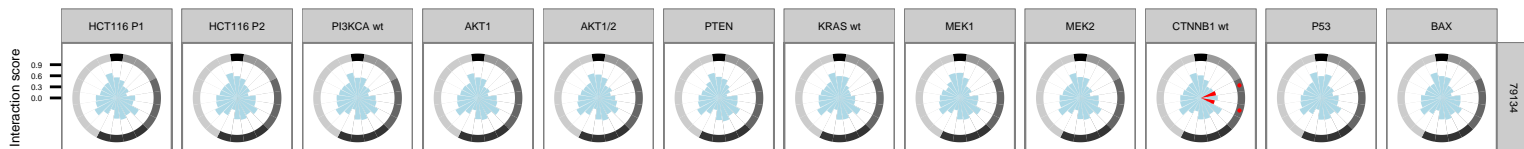

Colchicine

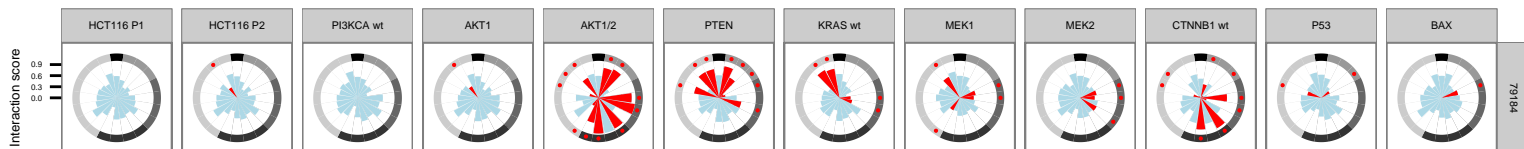

Cyclosporin A

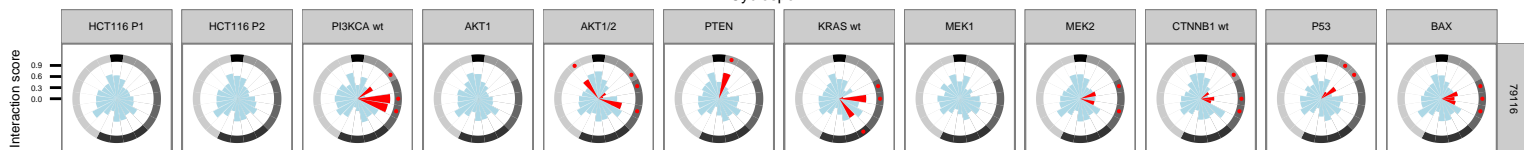

Cytosine-1-beta-D-arabinofuranoside hydrochloride

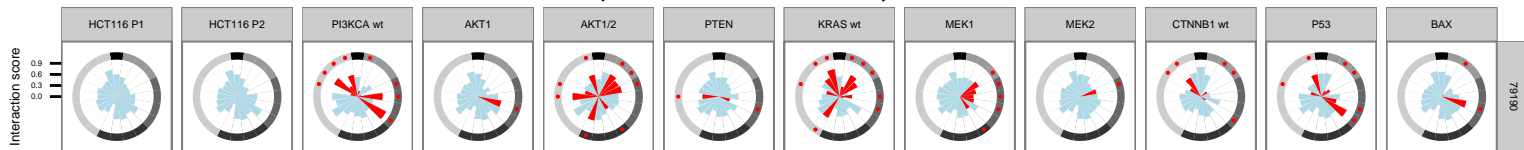

DAPH

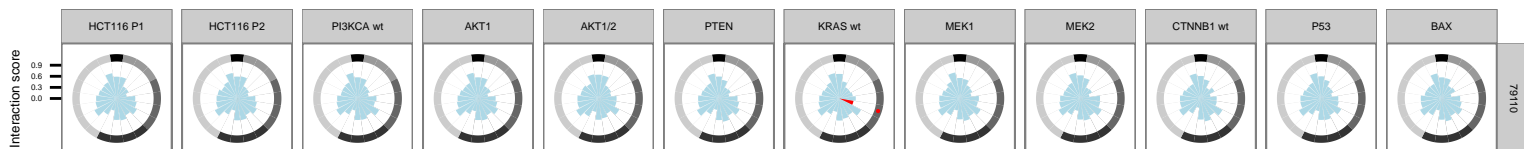

Debrisoquin sulfate

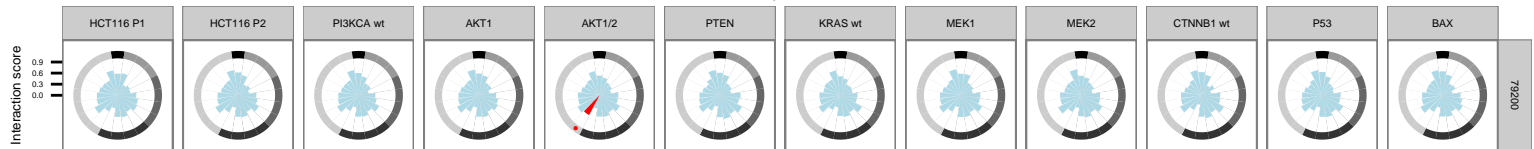

Dequalinium chloride hydrate

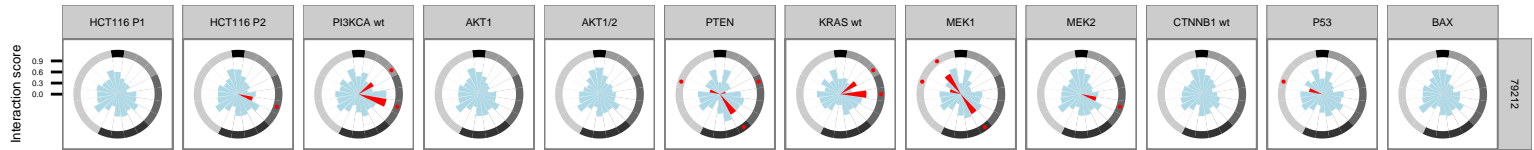

Dihydroouabain

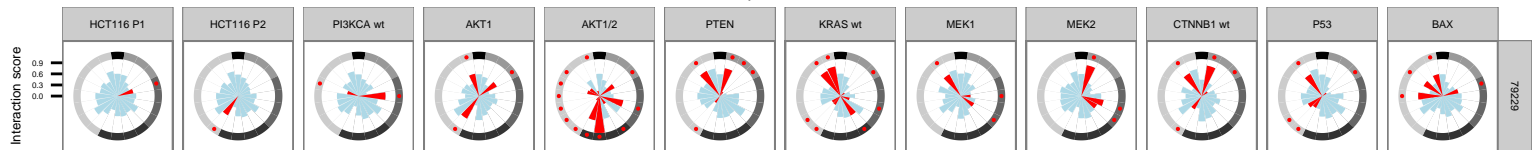

Diphenylethidium chloride

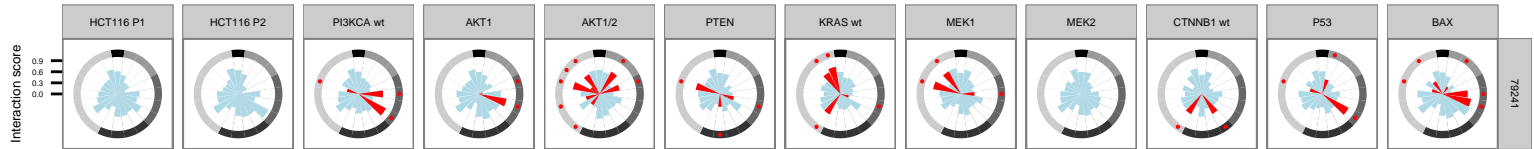

DL-alpha-Methyl-p-tyrosine

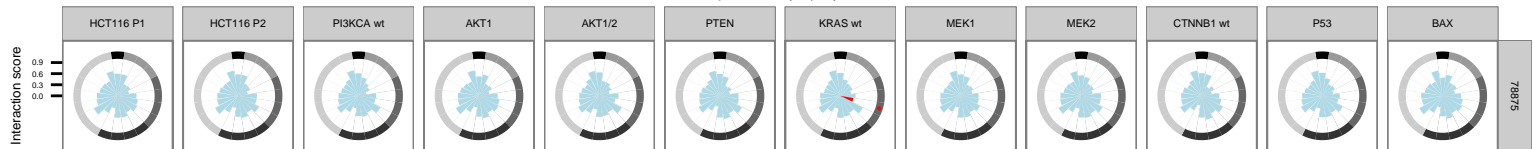

DL-Stearoylcarnitine chloride

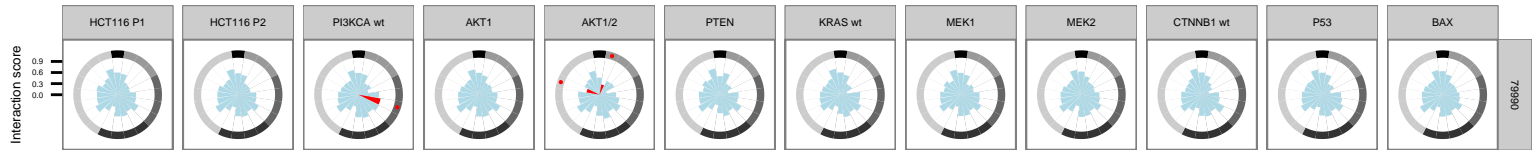

Domperidone

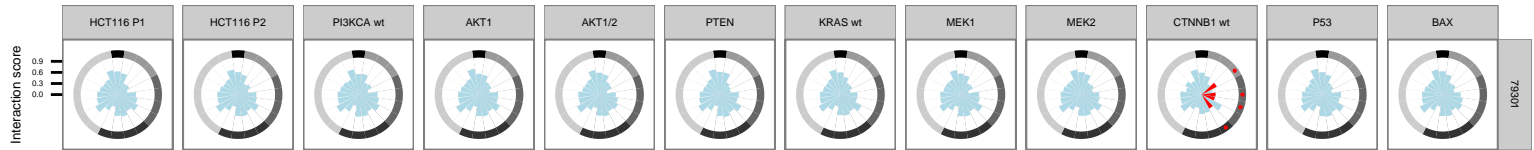

Droperidol

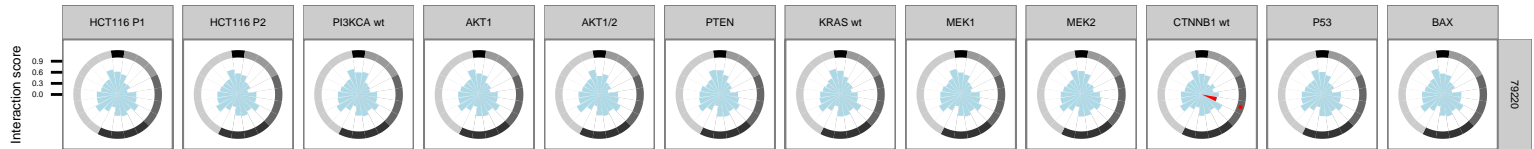

(E)-5-(2-Bromovinyl)-2'-deoxyuridine

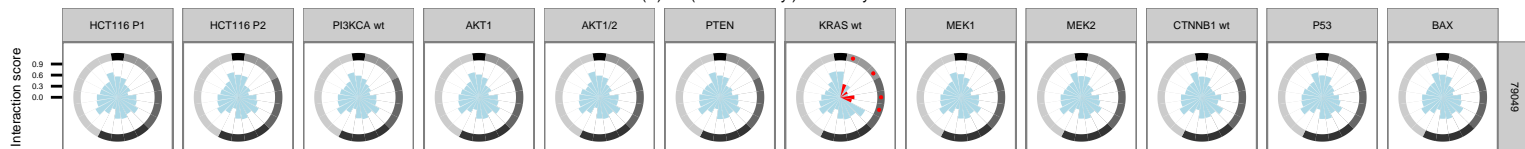

EGTA

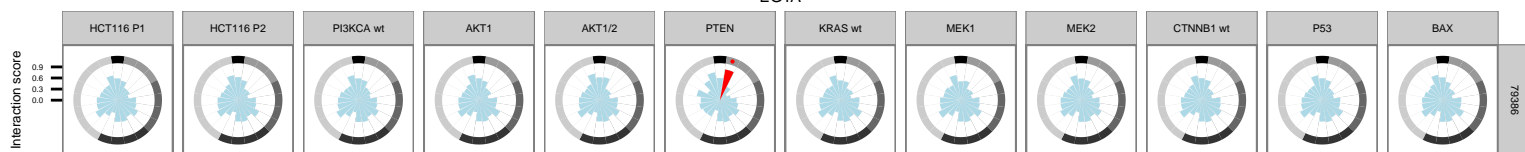

Ellipticine

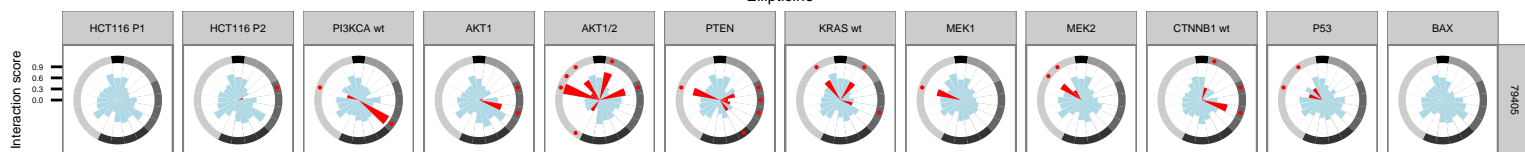

Emetine dihydrochloride hydrate

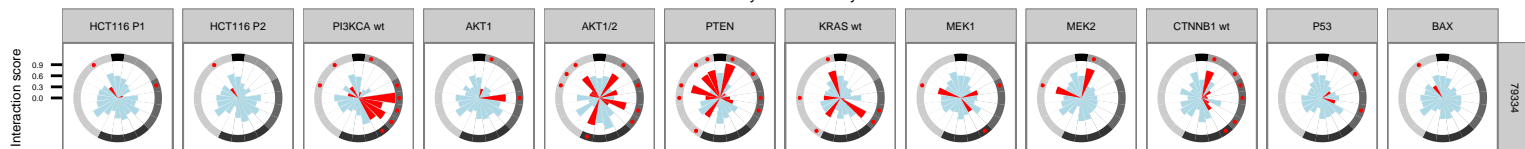

Enalaprilat dihydrate

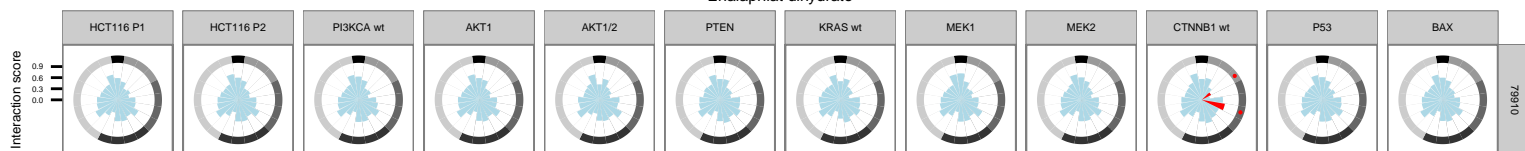

ET-18-OCH3

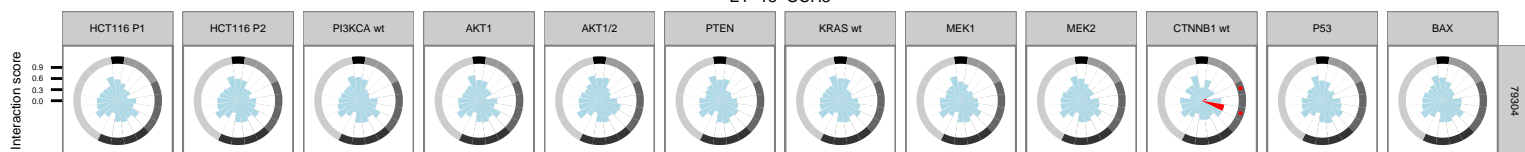

Ethopropazine hydrochloride

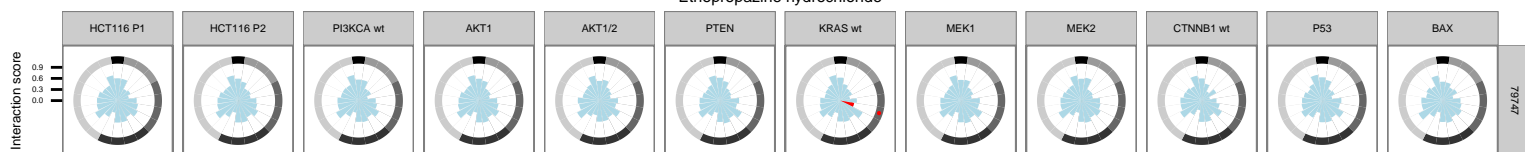

Etoposide

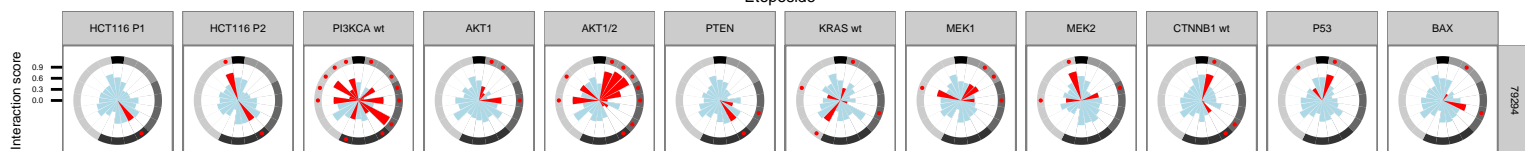

Fluphenazine dihydrochloride

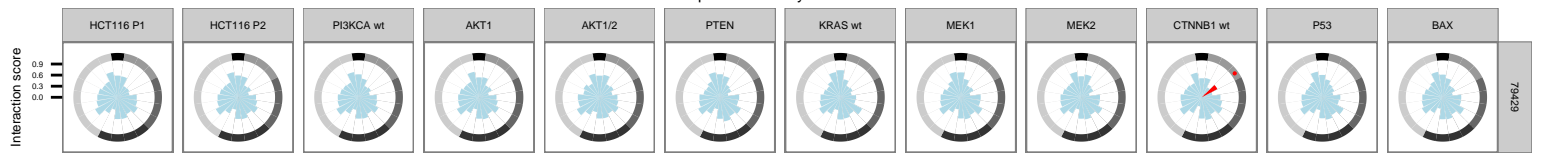

Forskolin

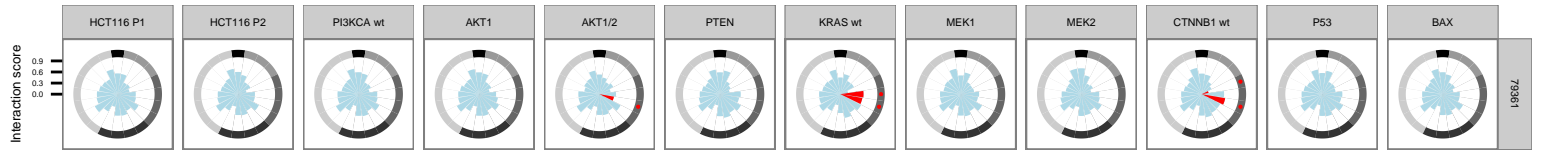

Ganciclovir

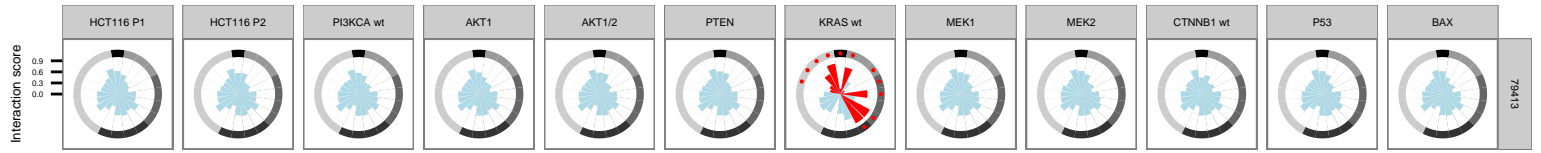

Genistein

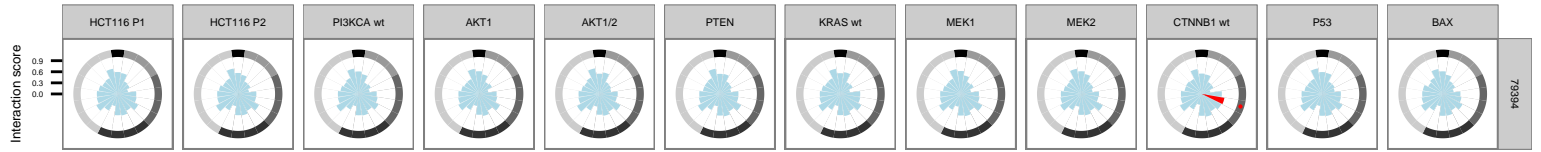

Gossypol

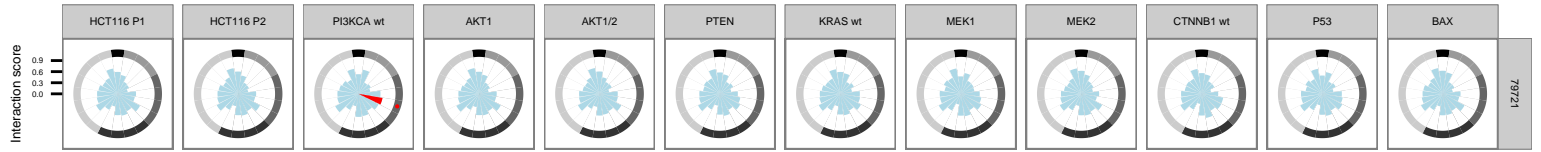

GR 127935 hydrochloride hydrate

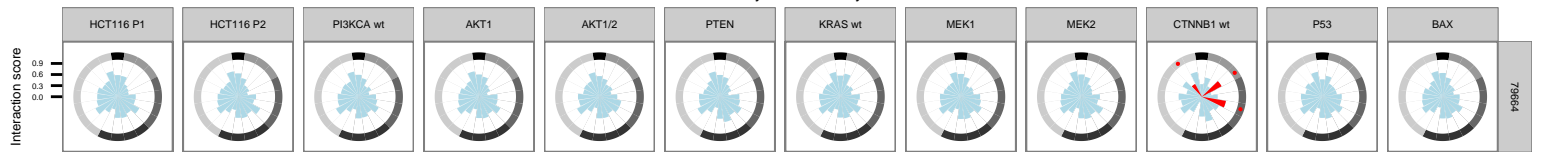

GW405833 hydrochloride

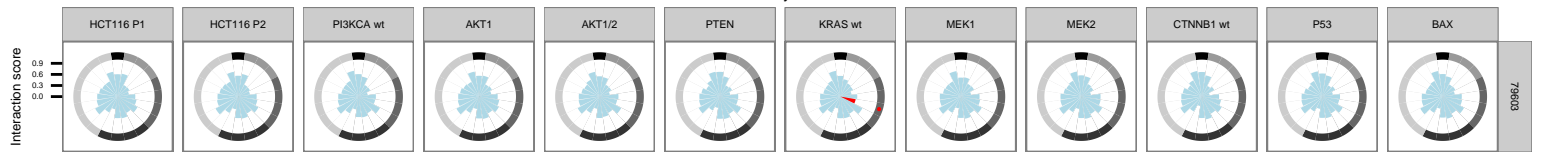

GW9508

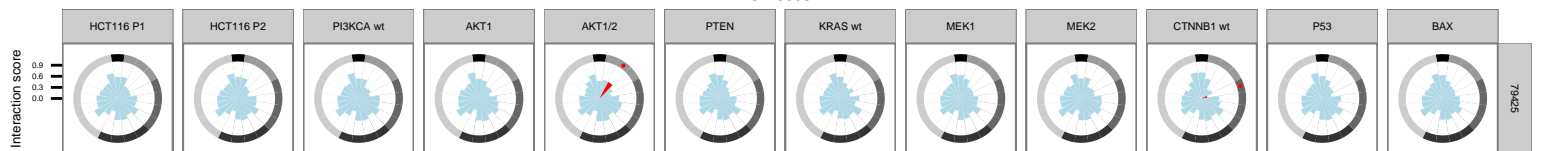



Hydralazine hydrochloride

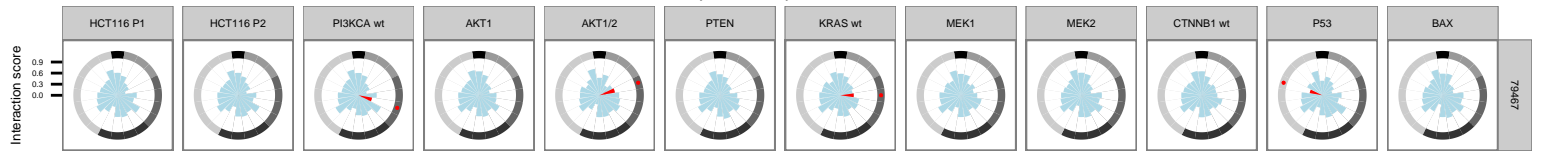

IB-MECA

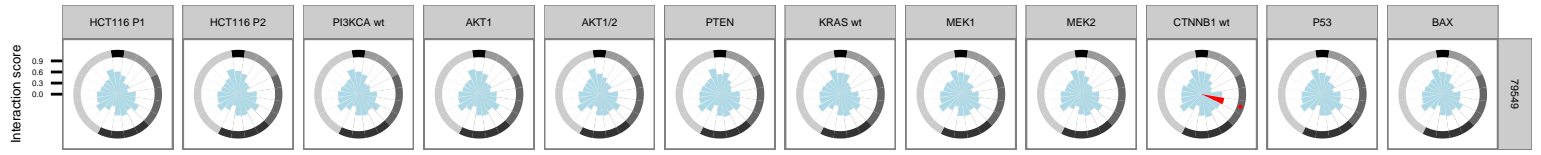

IC 261

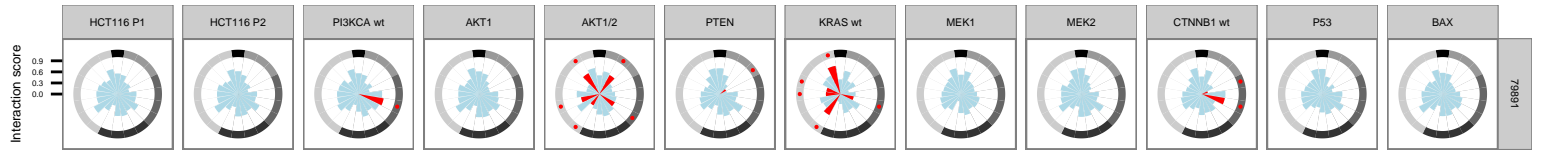

Idarubicin

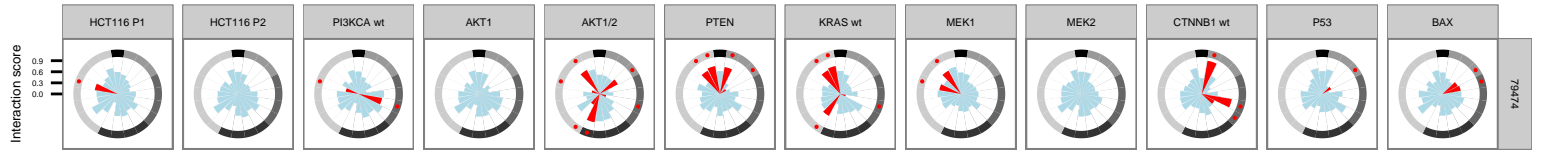

Ifenprodil tartrate

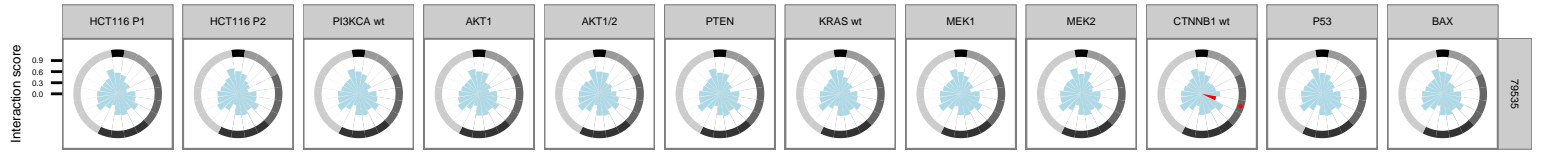

Indatraline hydrochloride

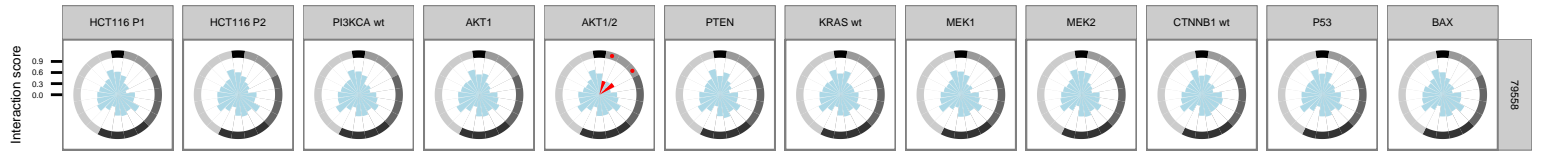

Indirubin-3'-oxime

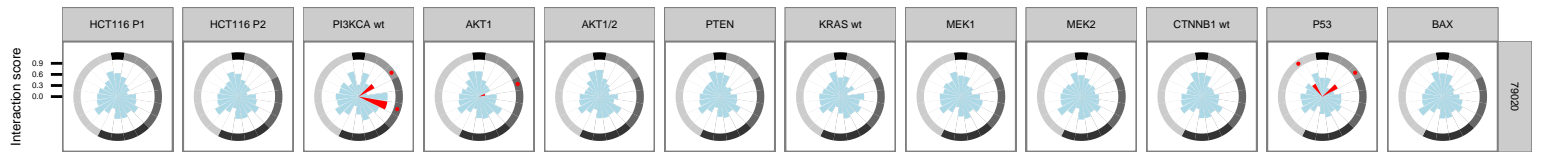

Iodoacetamide

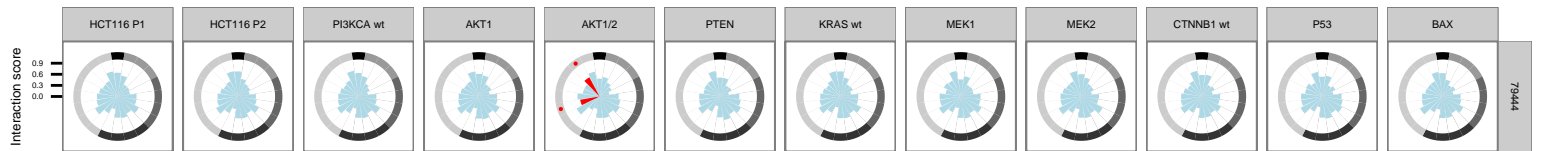

IRAK-1/4 Inhibitor I

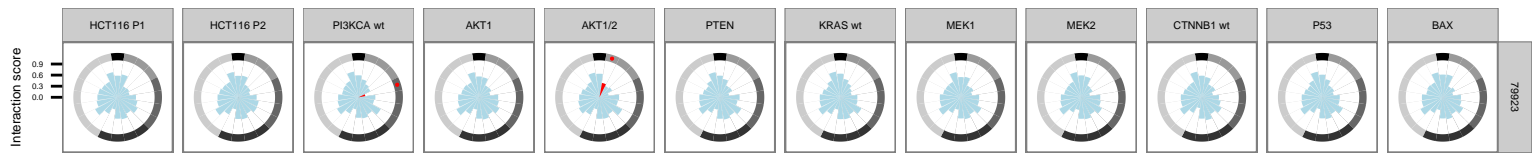

Ivermectin

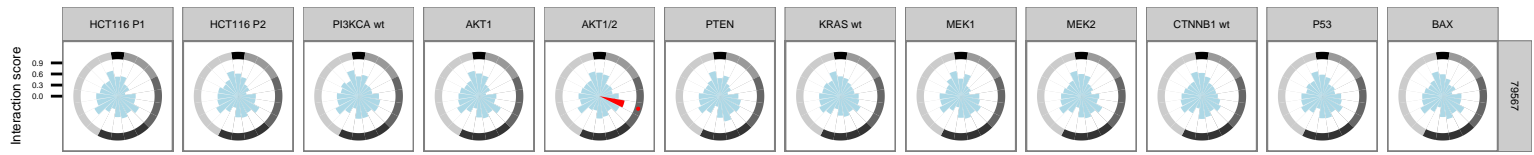

JL-18

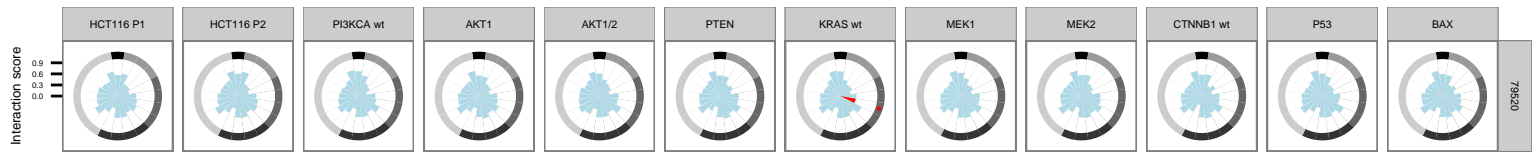

L-703,606 oxalate salt hydrate

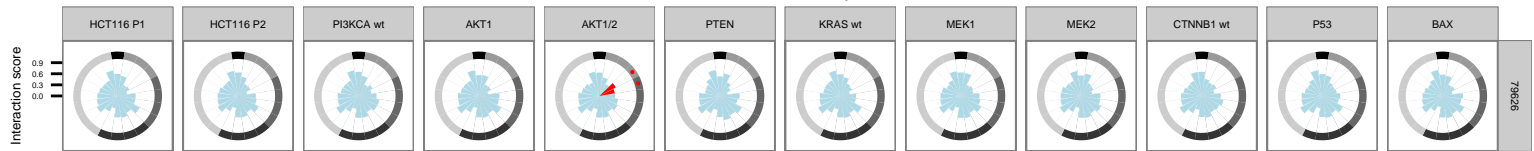

L-750,667 trihydrochloride

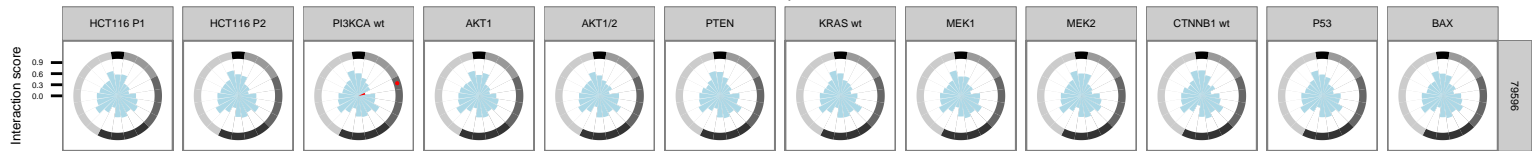

L-Canavanine sulfate

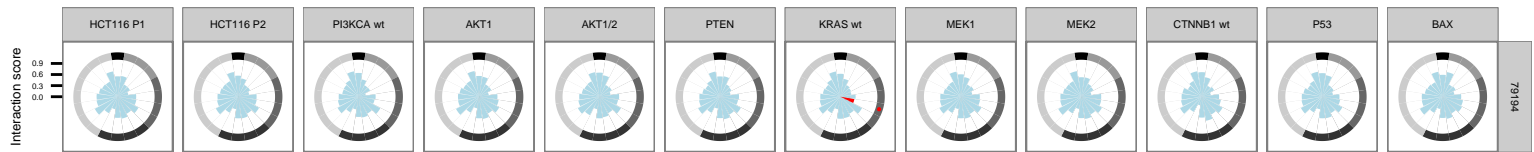

LFM-A13

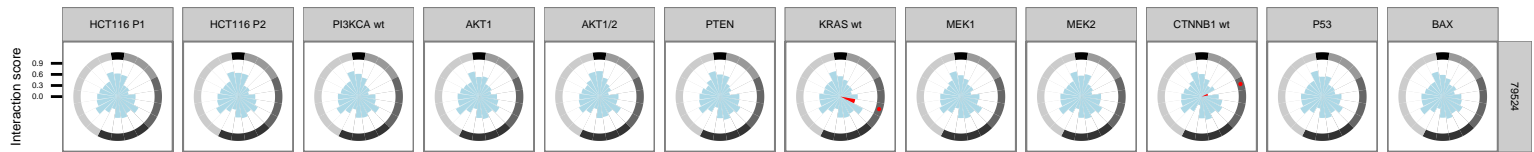

Loperamide hydrochloride

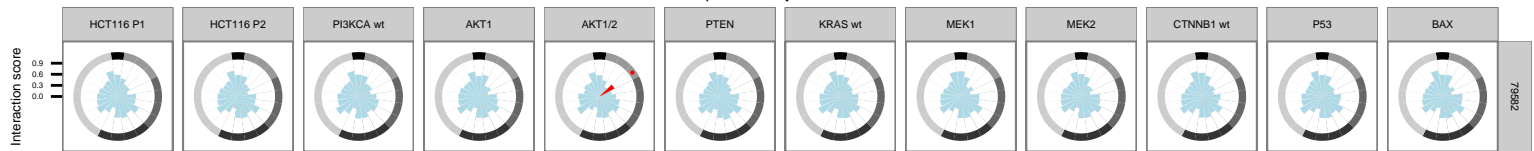

Loxapine succinate

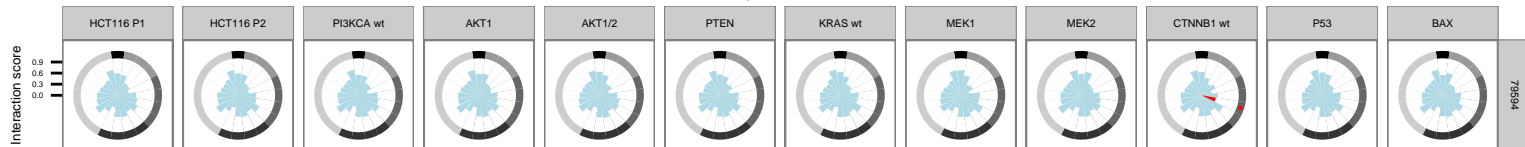

LP44

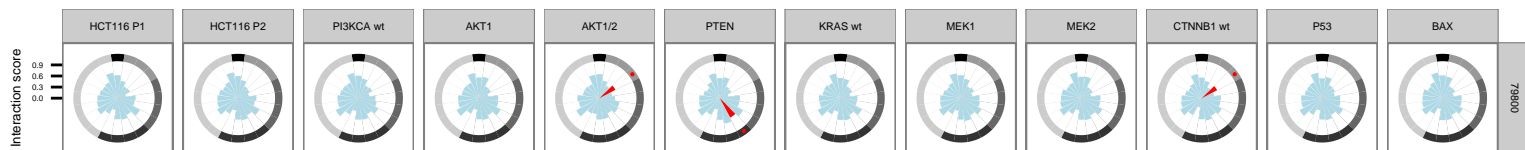

MDL 28170

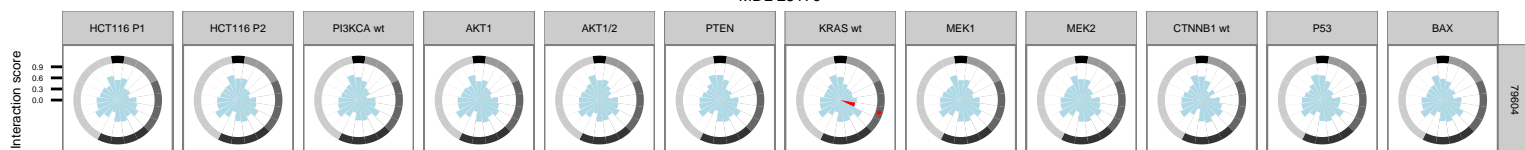

Me-3,4-dephostatin

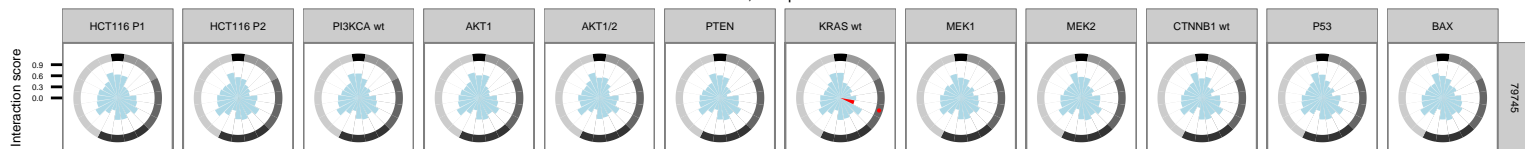

Melphalan

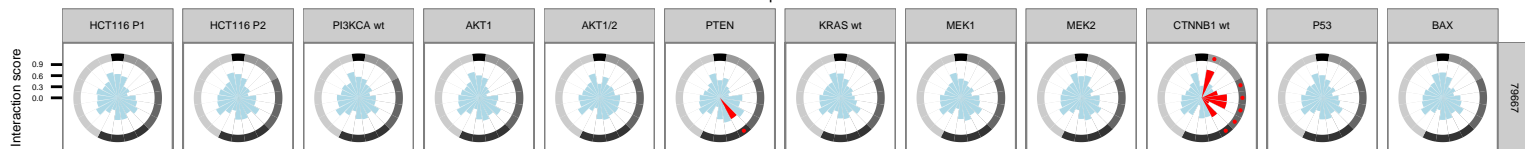

Metergoline

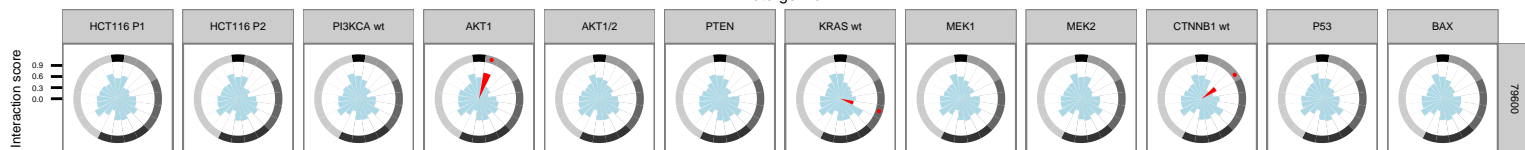

Methapyrilene hydrochloride

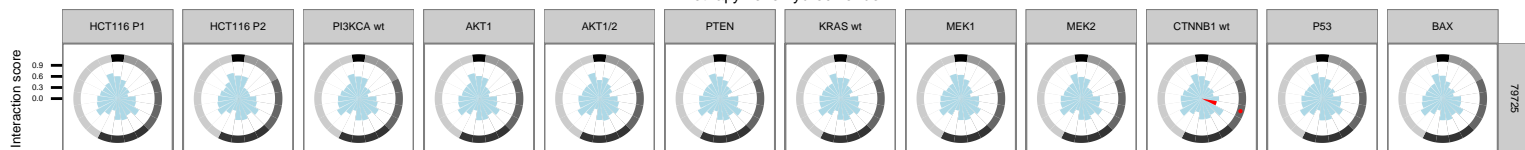

Methotrexate hydrate

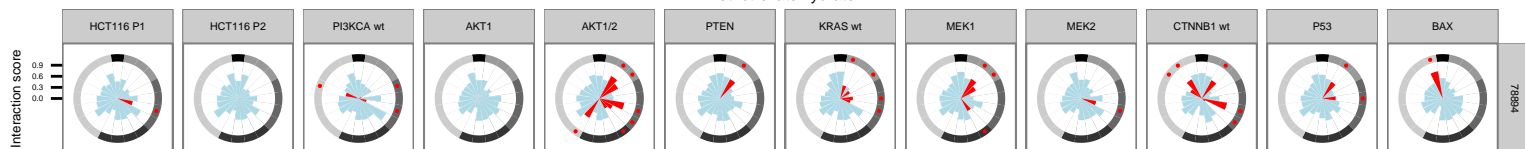

Mevastatin

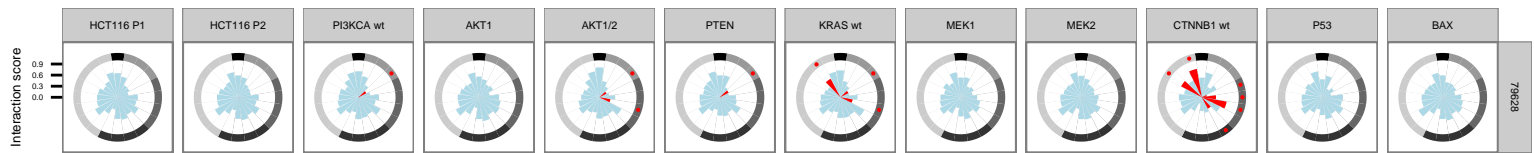

MG 624

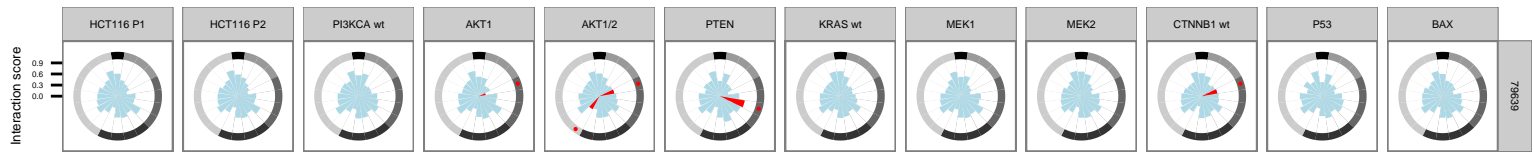

Mitoxantrone

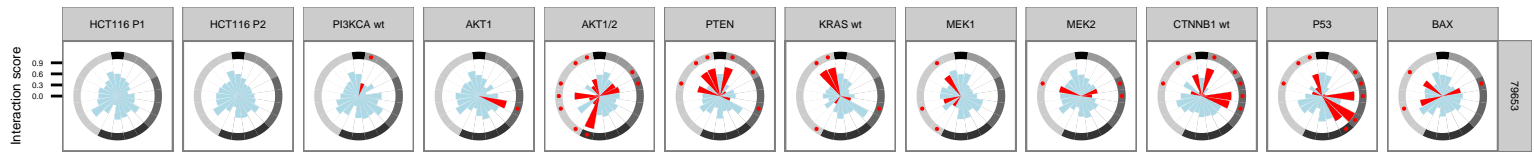

(+)-MK-801 hydrogen maleate

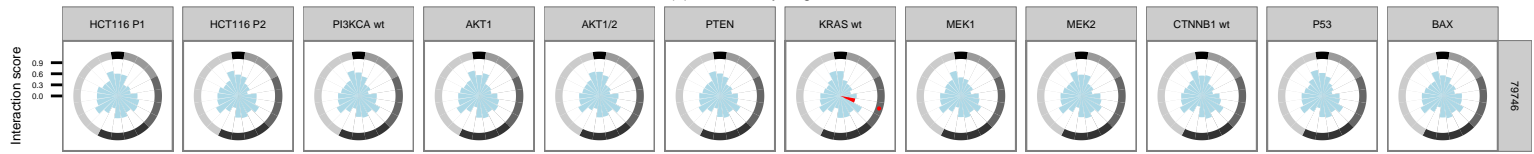

MNS

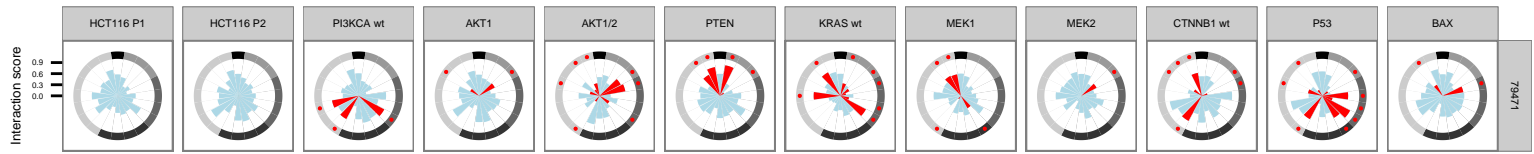

Molsidomine

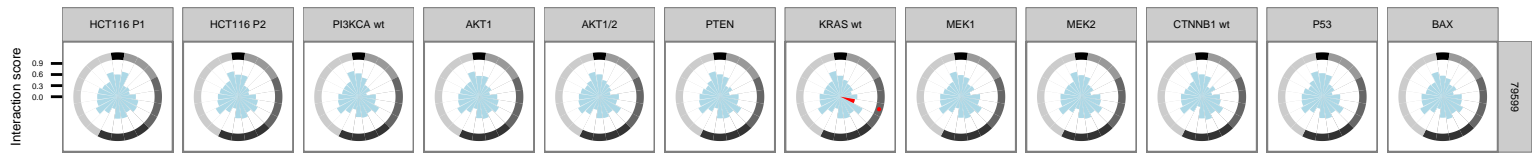

N6-2-(4-Aminophenyl)ethyladenosine

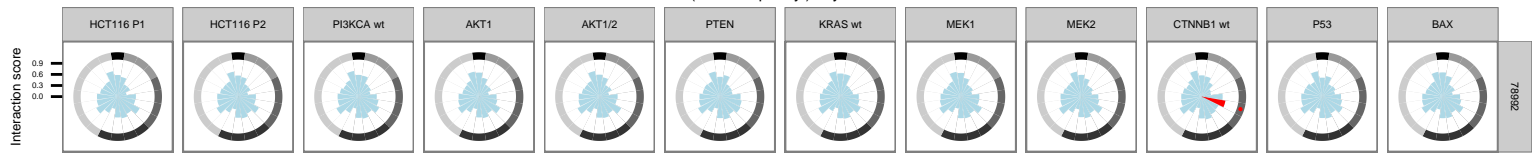

N-Acetyl-L-Cysteine

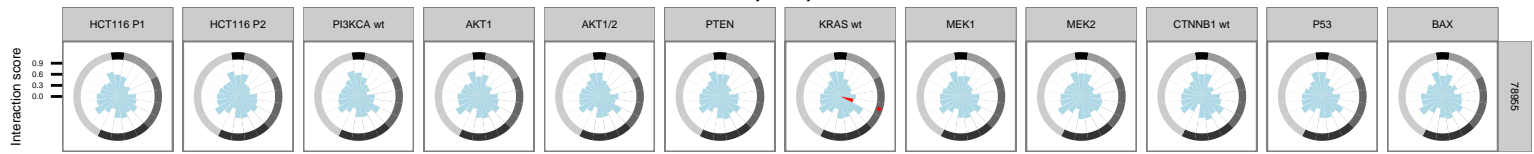

Niclosamide

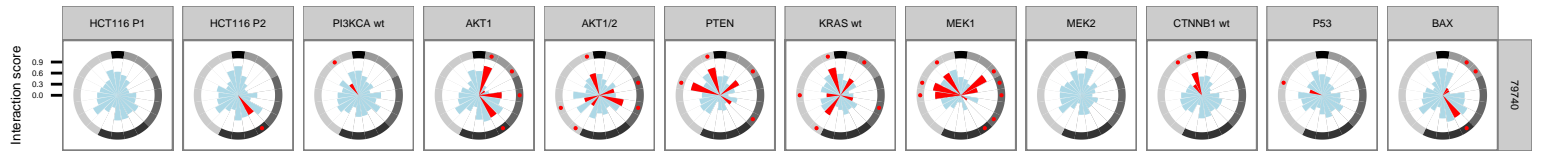

Nocodazole

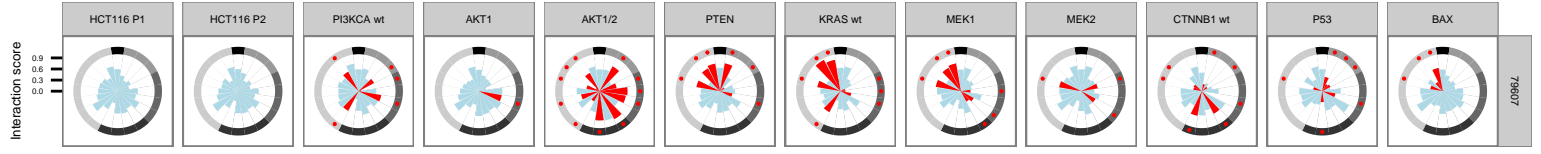

Nordihydroguaiaretic acid from Larrea divaricata (creosote bush)

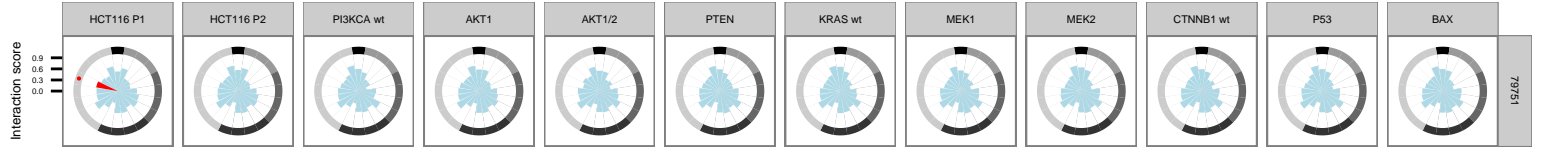

NSC 95397

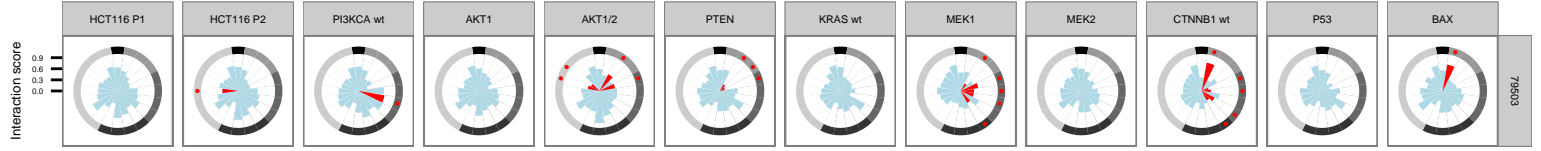

NU2058

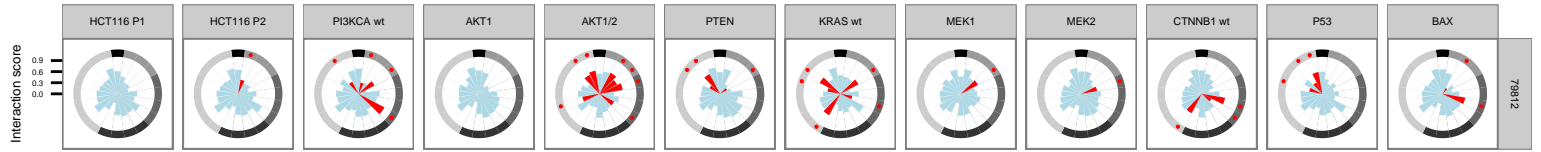

NU6027

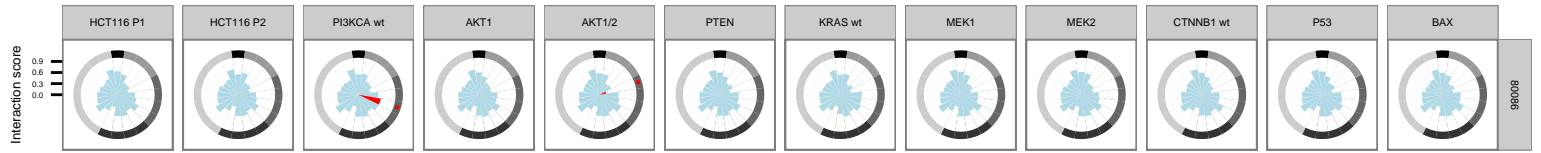

ODQ

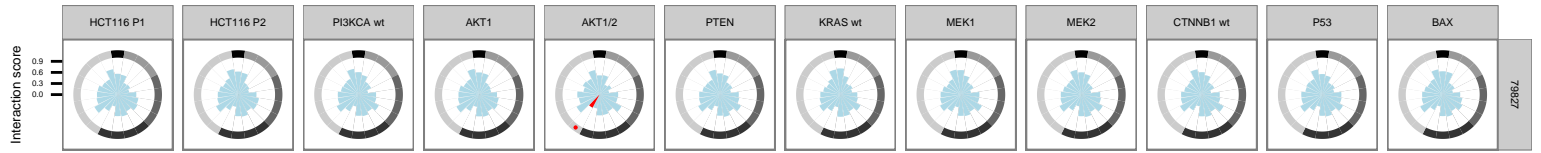

Ouabain

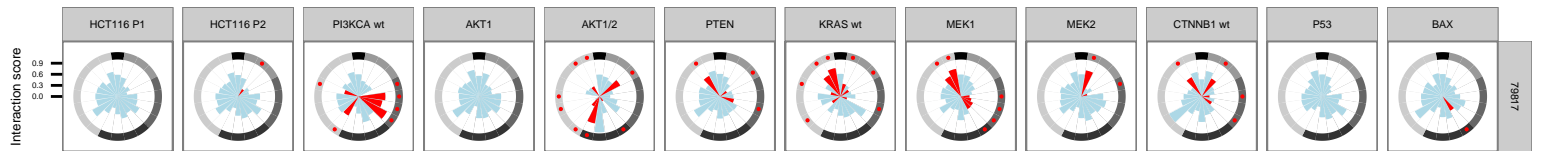

PAC-1

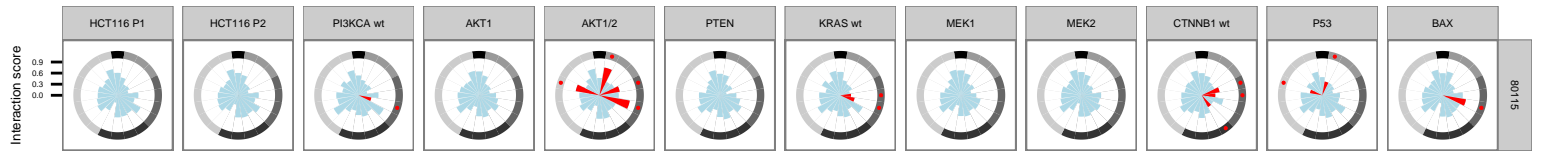

Paliperidone

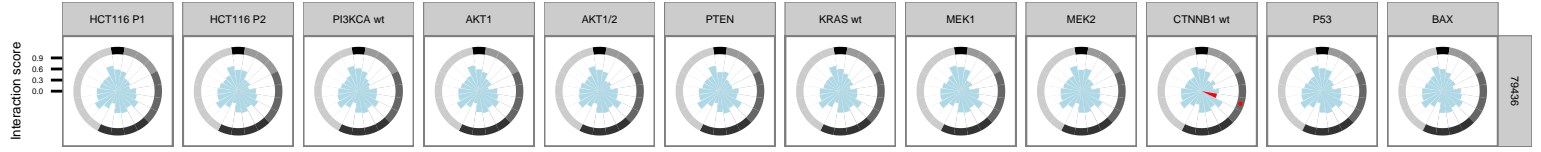

Parthenolide

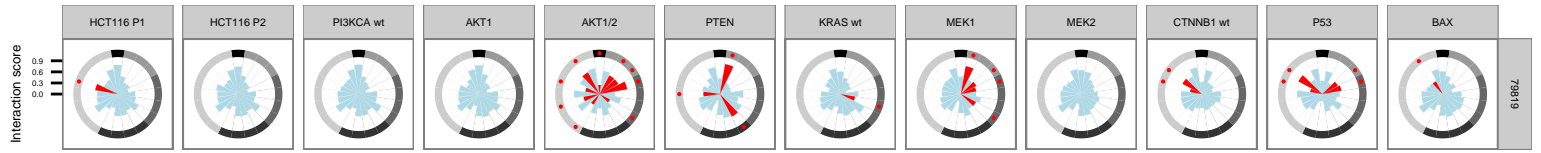

PD 169316

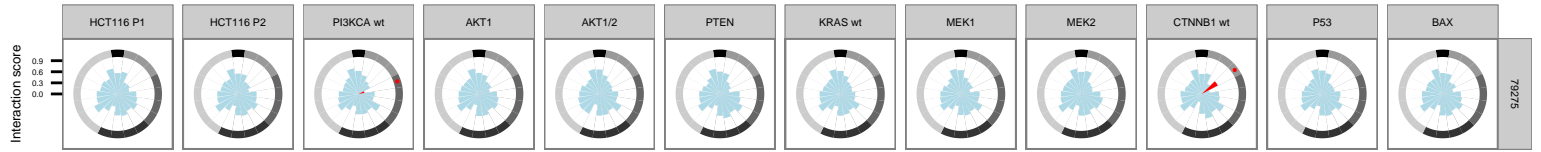

PD 98,059

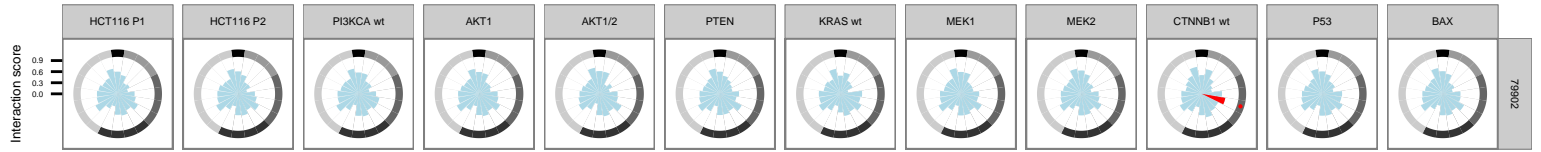

Pentamidine isethionate

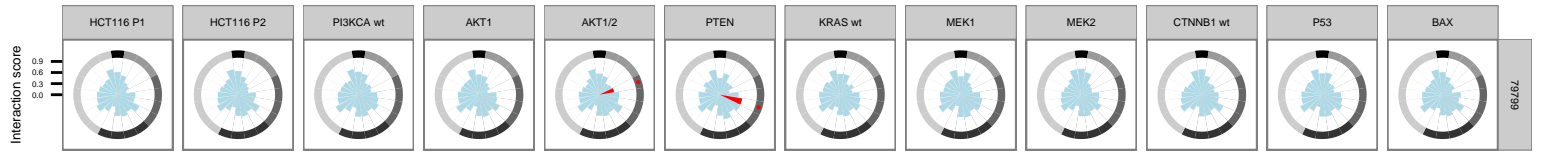

Perphenazine

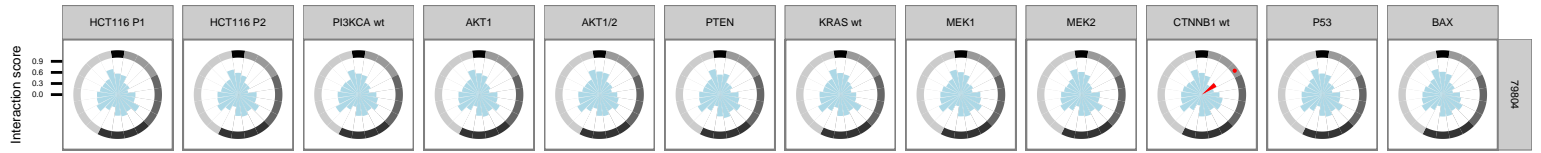

Phenamyl methanesulfonate

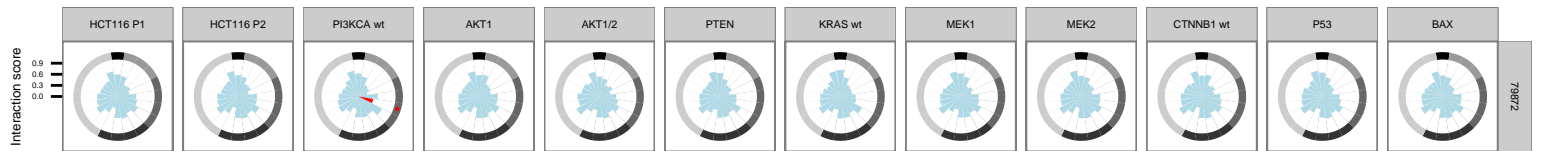

Phorbol 12-myristate 13-acetate

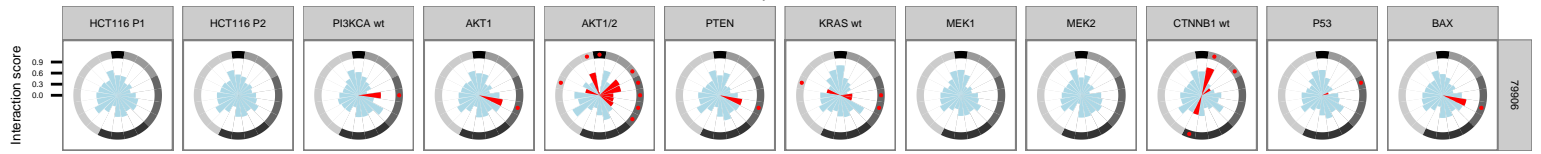

Pifithrin- $\mu$

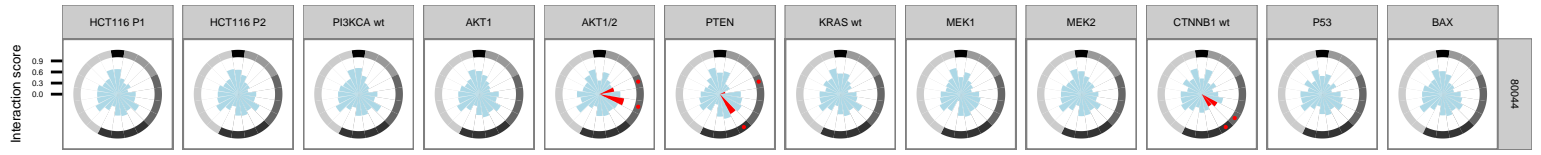

p-MPPI hydrochloride

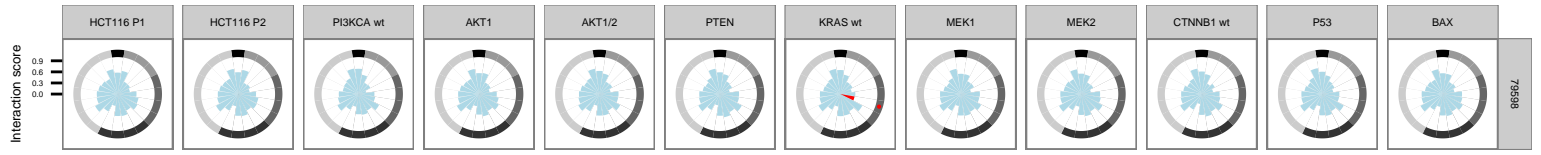

Podophyllotoxin

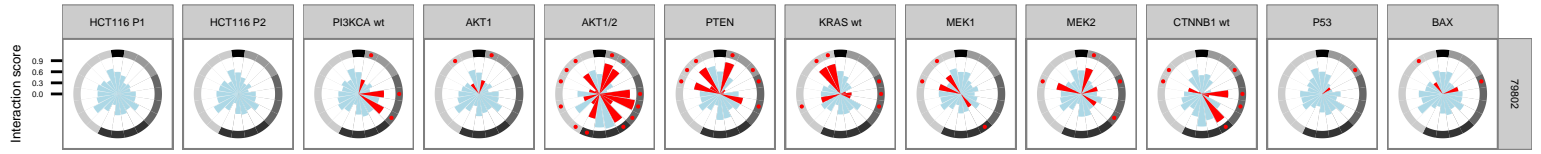

Prilocaine hydrochloride

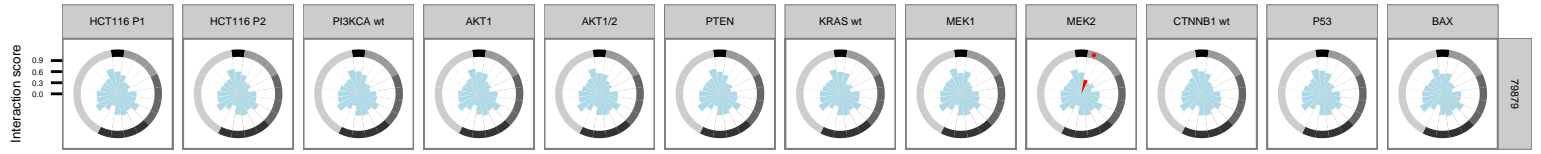

Promazine hydrochloride

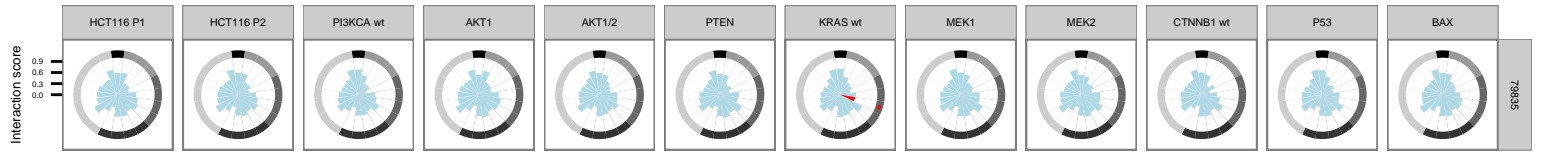

Promethazine hydrochloride

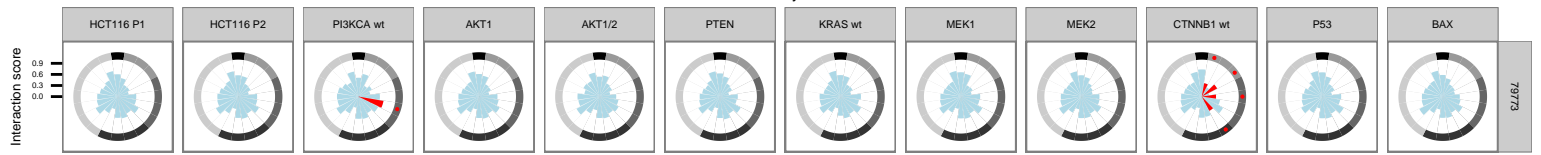

Pyrocatechol

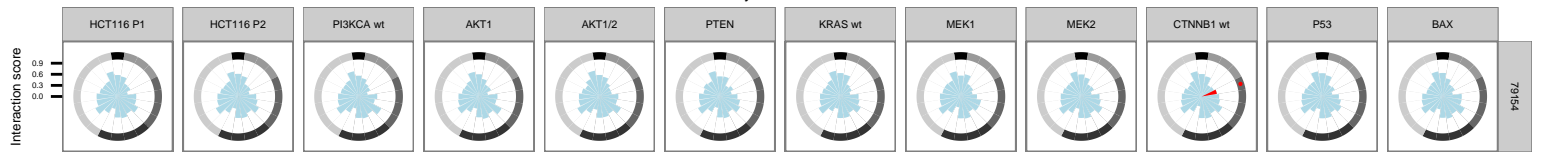

Quinacrine dihydrochloride

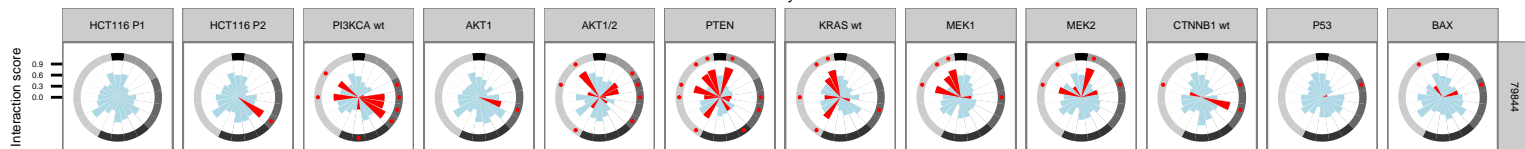

R(+)-6-Bromo-APB hydrobromide

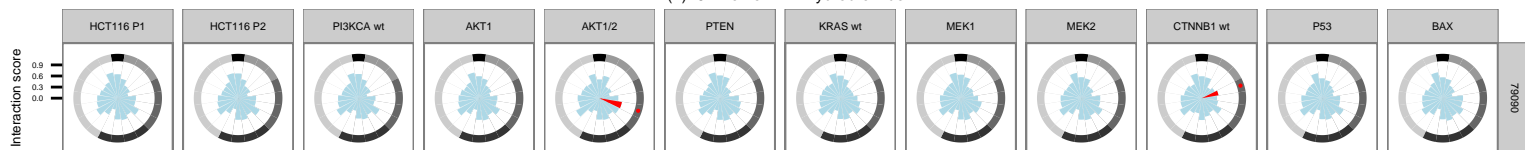

R-(+)-8-Hydroxy-DPAT hydrobromide

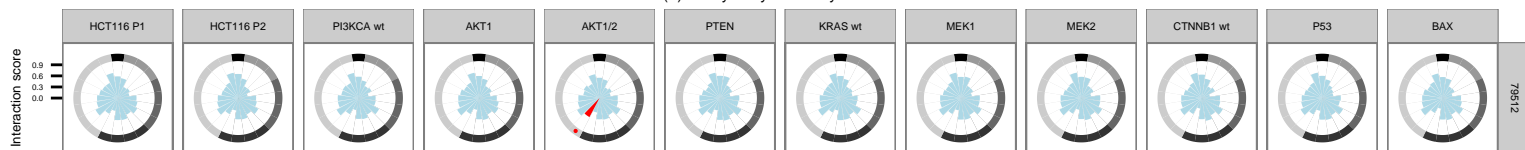

Ribavirin

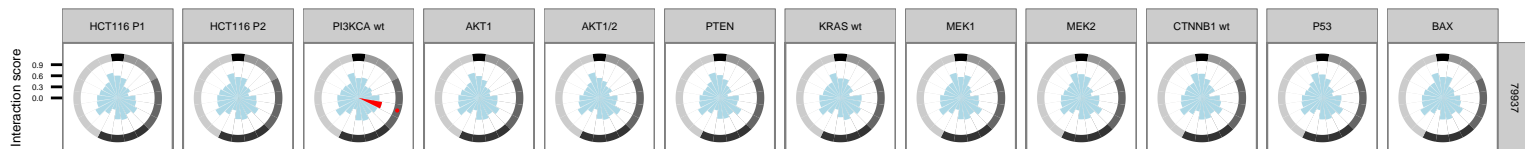

Rotenone

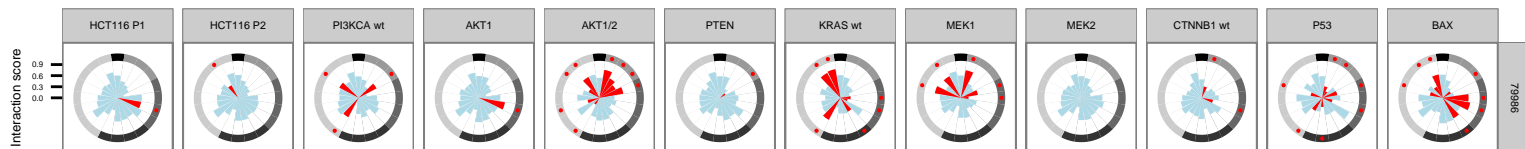

Rottlerin

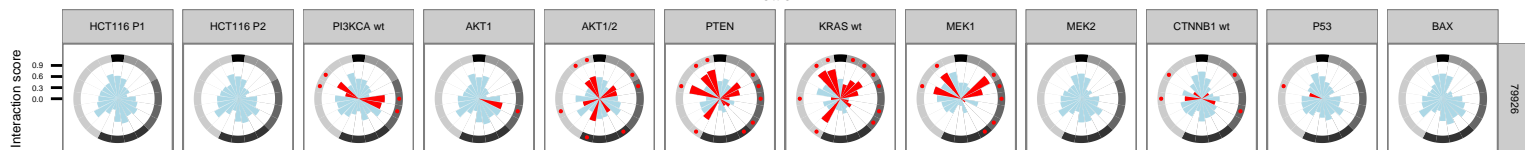

Sanguinarine chloride

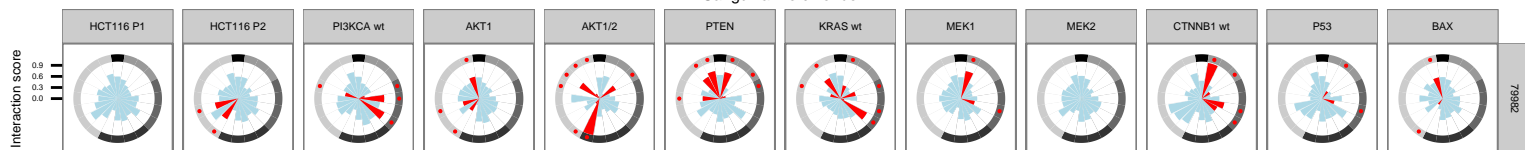

SB 202190

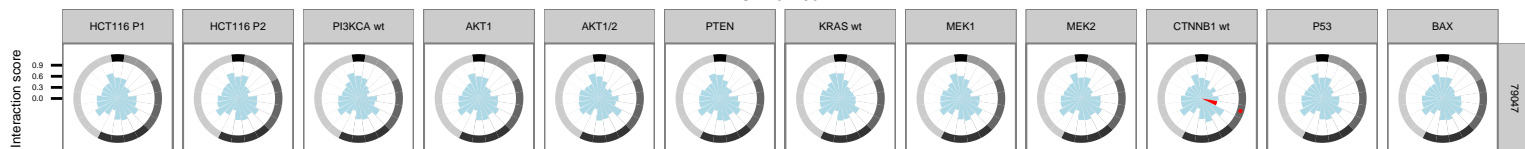



SB 415286

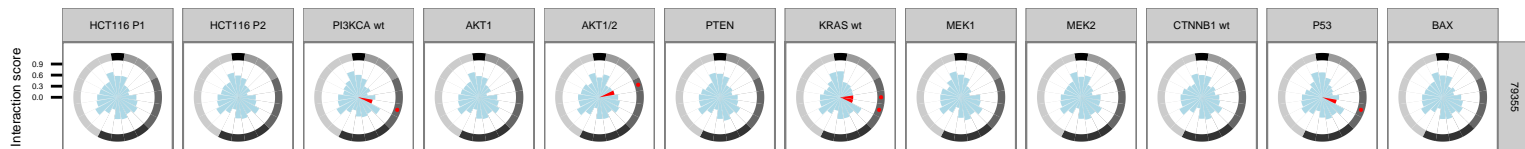

(S)-(+)-Camptothecin

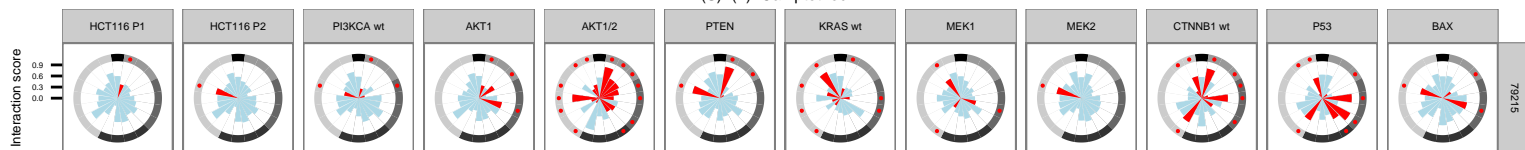

Sivelestat sodium salt hydrate

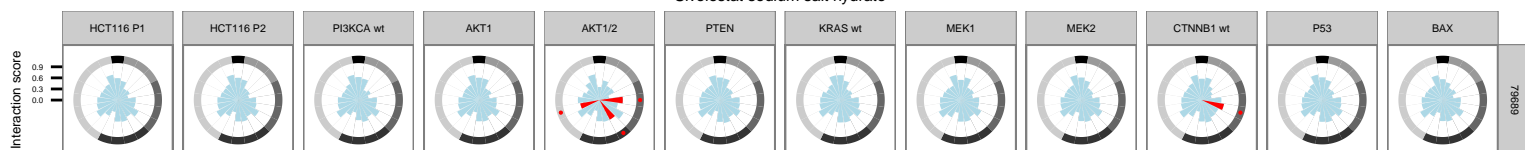

SKF 96365

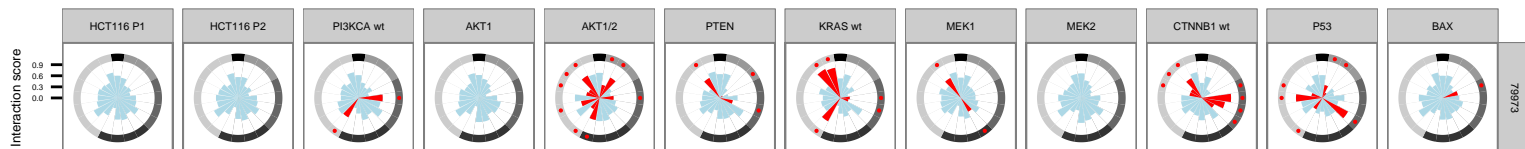

Sobuzoxane

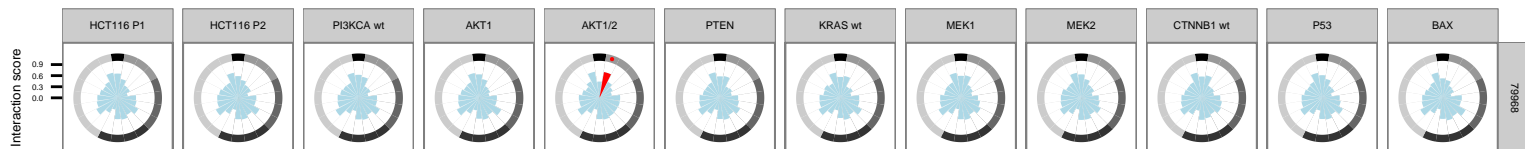

Siperone hydrochloride

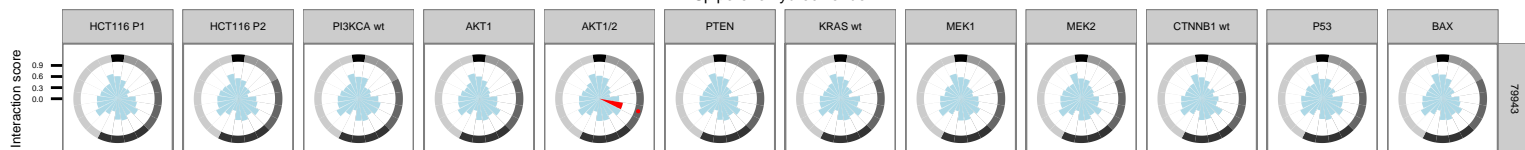

Stattic

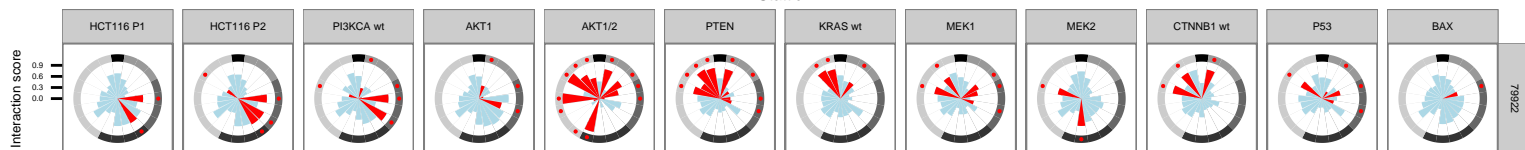

Staurosporine aglycone

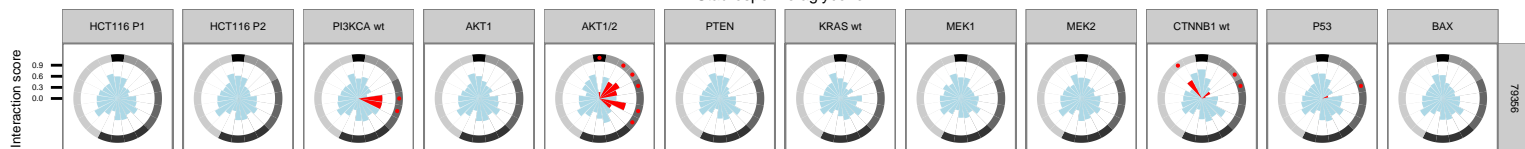

SU 5416

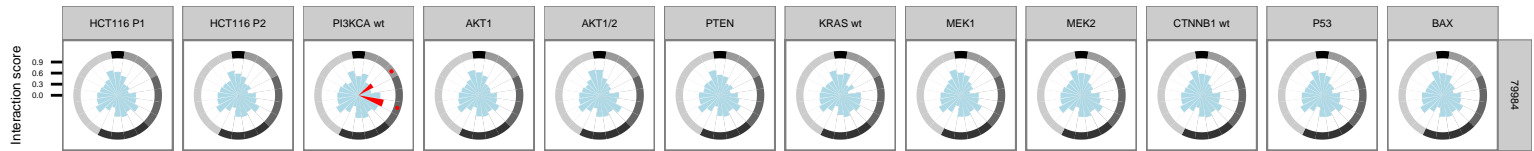

(-)-Sulpiride

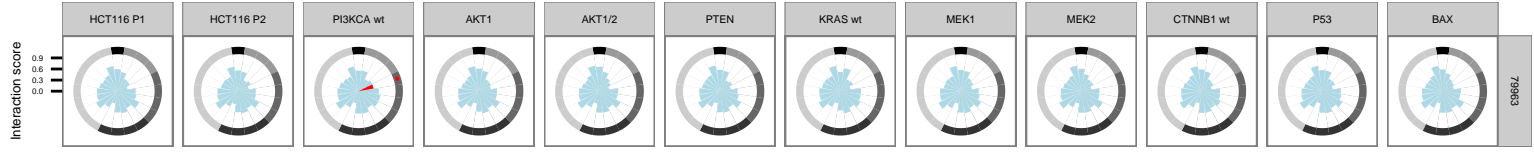

Supercinnamaldehyde

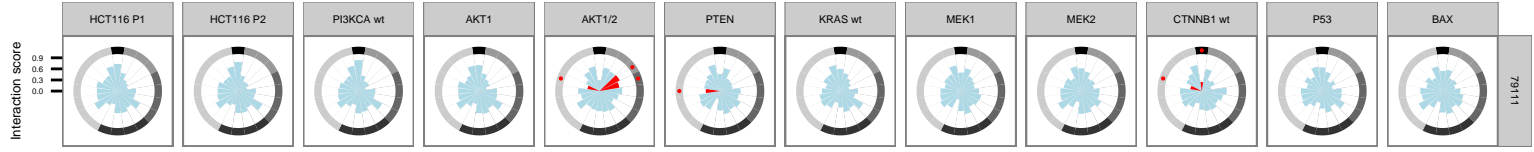

Taxol

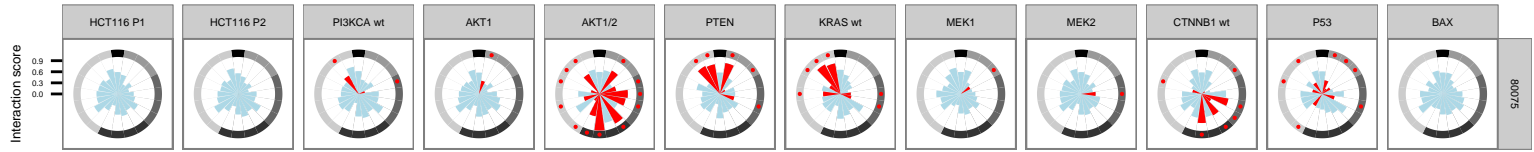

TBBz

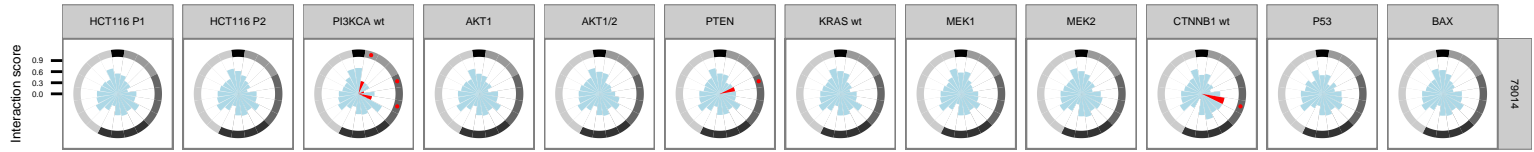

Terfenadine

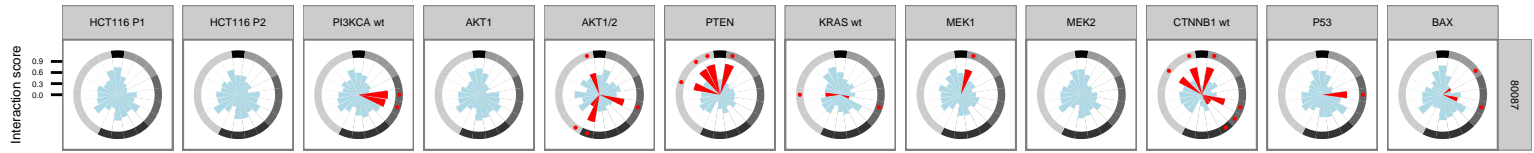

Tetraethylthiuram disulfide

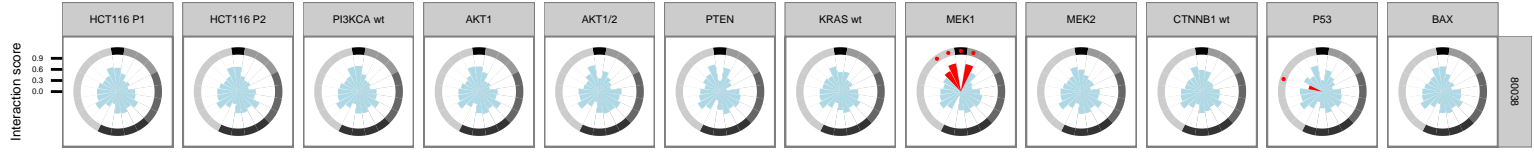

Thapsigargin

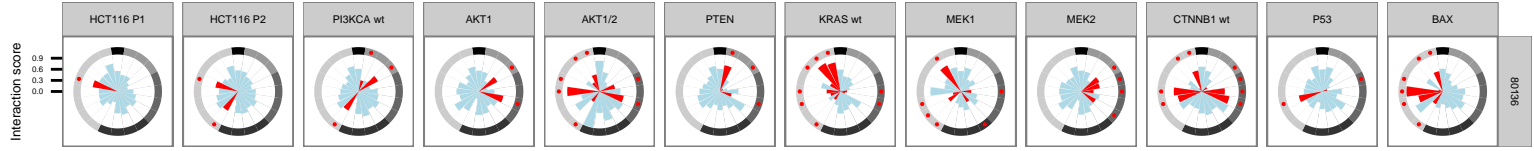

TMPH hydrochloride

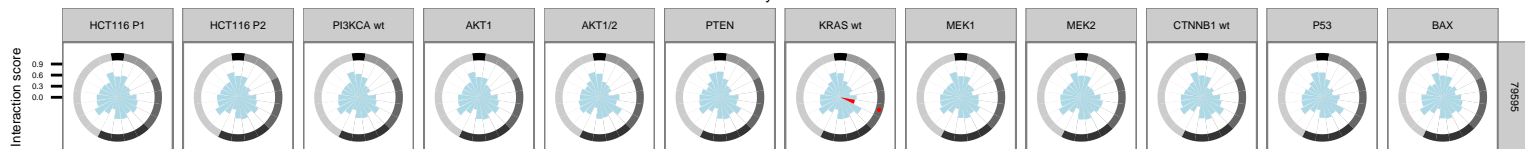

Tomoxetine

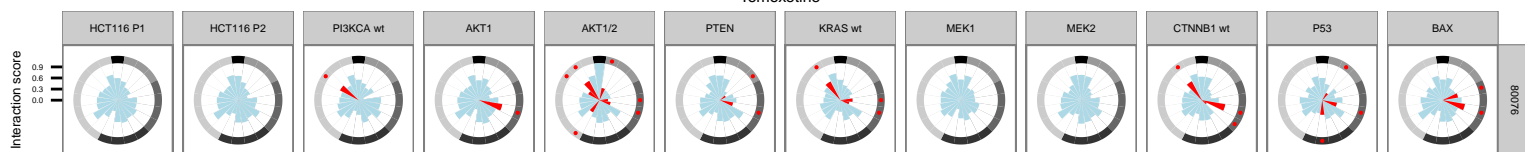

Trequinsin hydrochloride

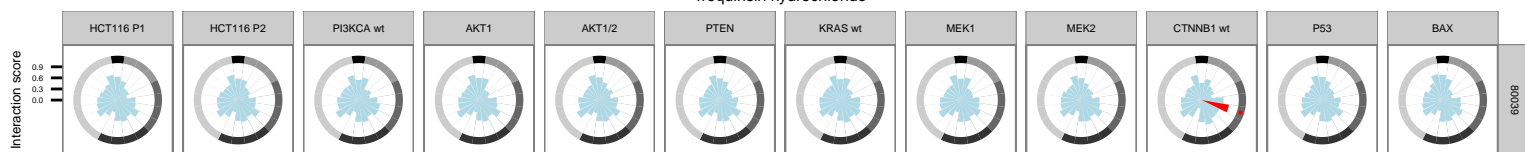

Trimipramine maleate

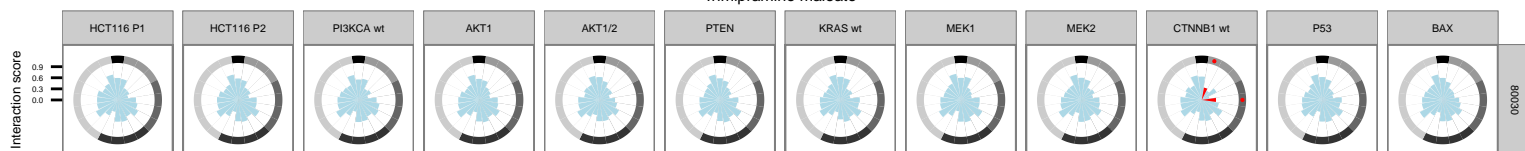

Tyrphostin A9

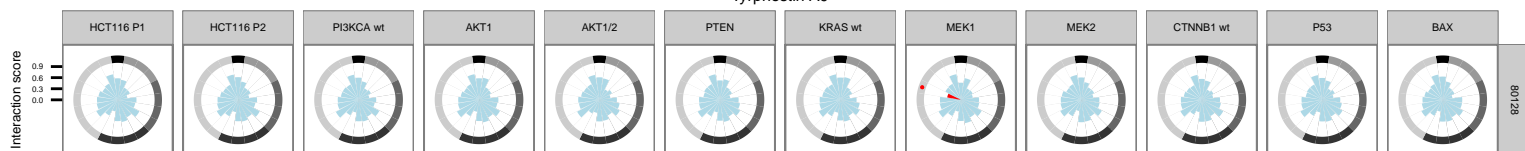

Tyrphostin AG 494

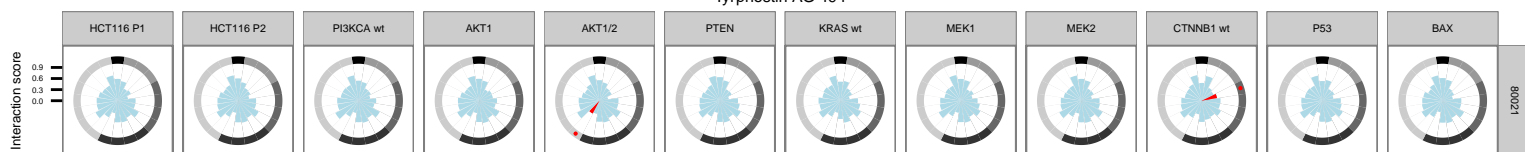

Tyrphostin AG 555

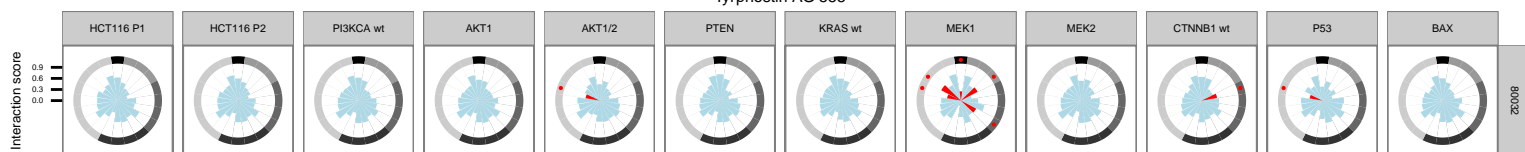

U0126

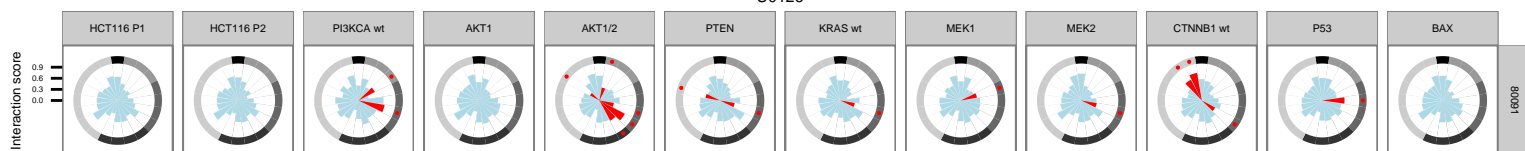

U-74389G maleate

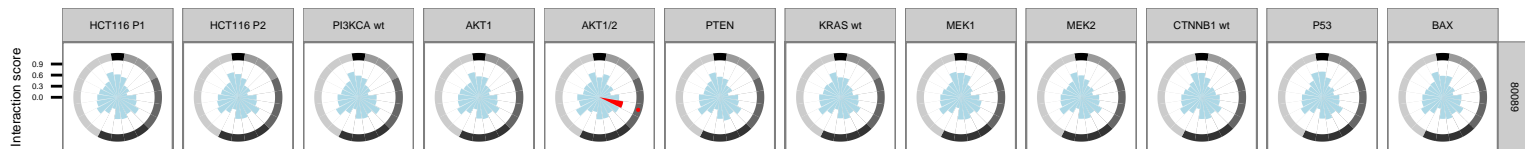

(+)-Vesamicol hydrochloride

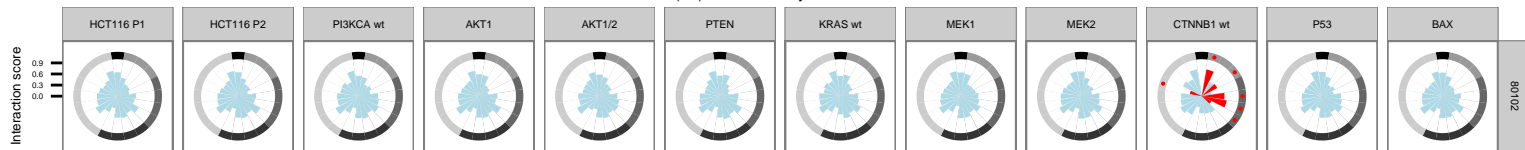

Vinblastine sulfate salt

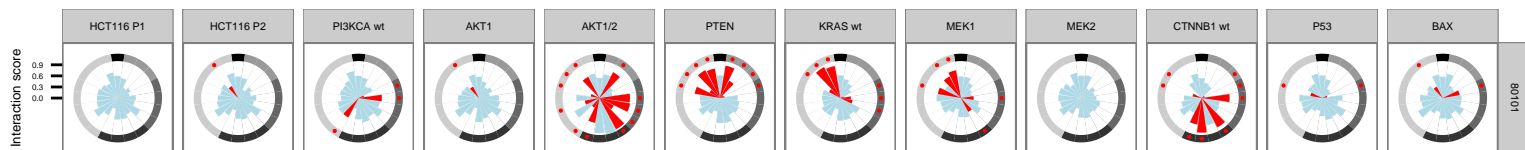

Vincristine sulfate

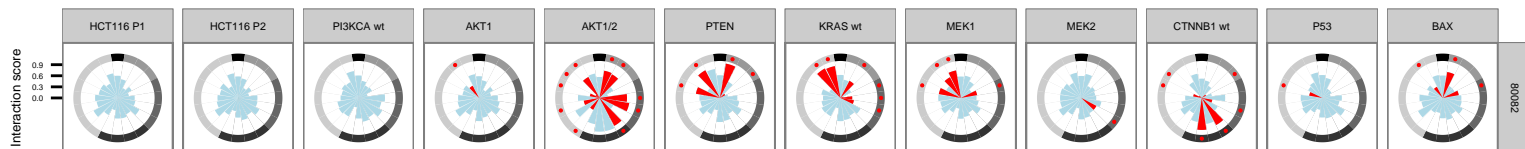

WIN 62,577

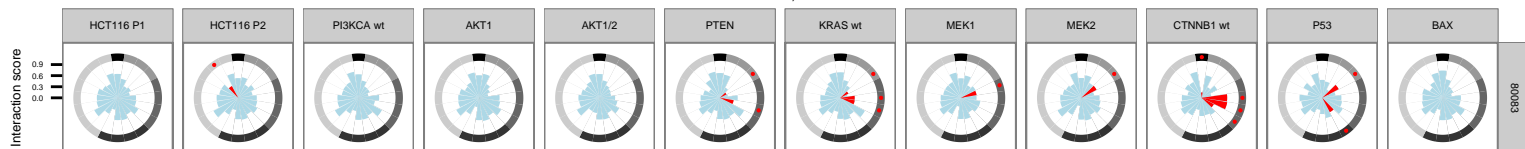

Wortmannin from Penicillium funiculosum

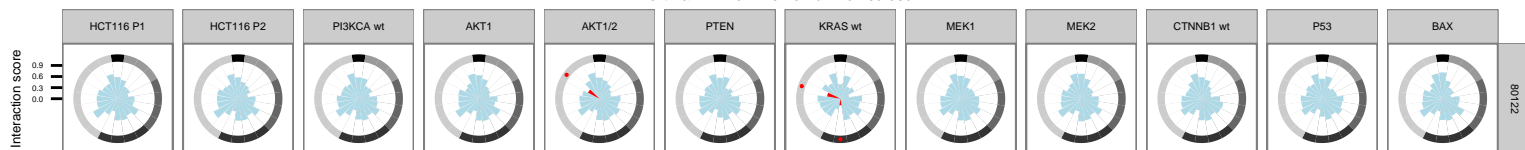

Y-27632 dihydrochloride

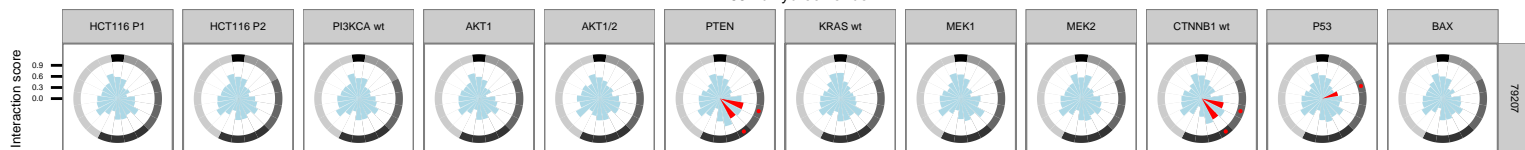

YC-1

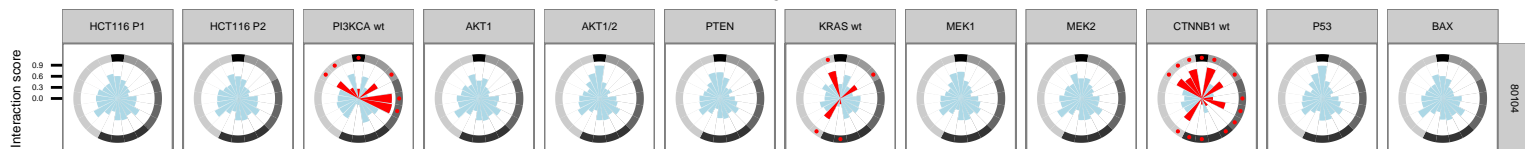

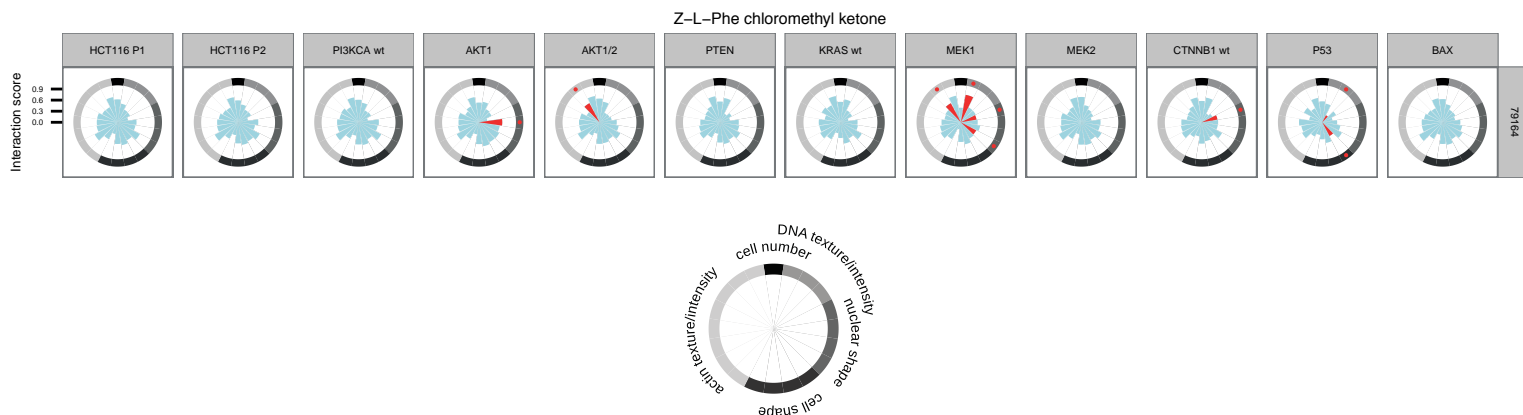

Appendix Figure S4. Significant multiparametric chemical-genetic interactions.

Chemical-genetic interactions were calculated for all 20 phenotypic features as described. A total of 193 compounds revealed significant interactions and their respective interaction spectra are plotted alphabetically. Interactions are scaled from 0-1. \* FDR < 0.01, highlighted in red.

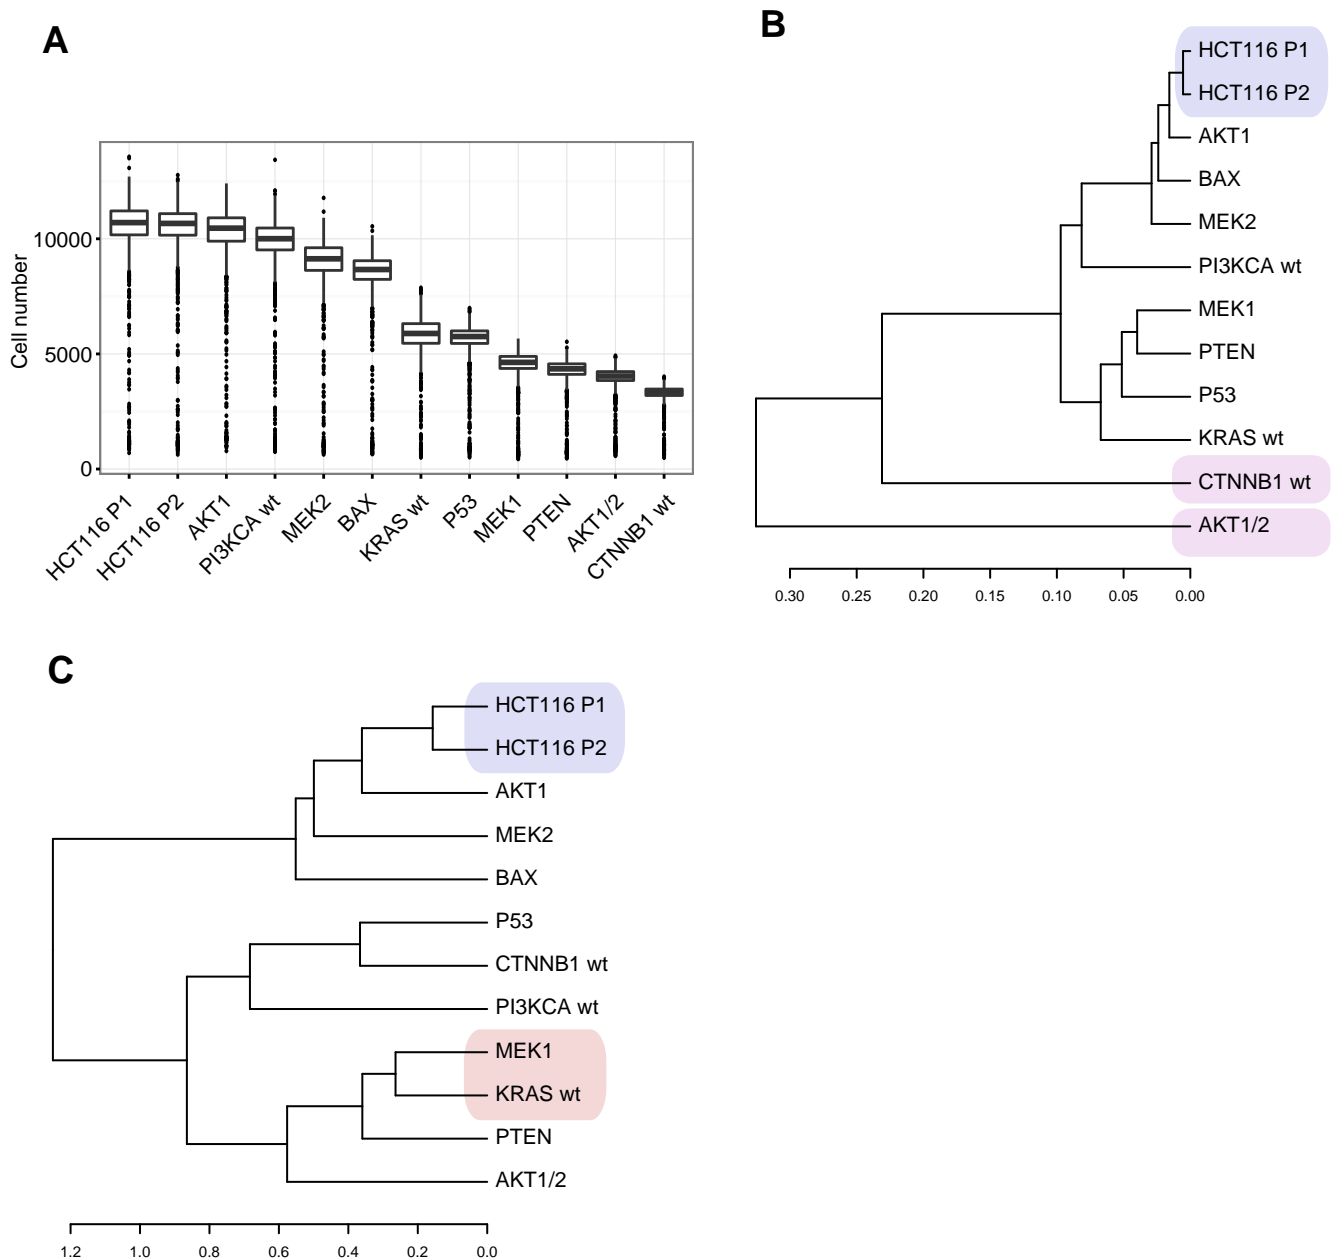

Appendix Figure S5. Strong main effects of gene KO and associations of isogenic cell lines. A Cell number for each isogenic cell line tested after 48h growth under control conditions (DMSO treatment). Particular isogenic cell lines display a pronounced phenotypic effect, i.e. impaired proliferation as compared to parental HCT116 cells.

B Unsupervised clustering of isogenic cell lines based on their 20-feature phenotype signature reveals that the parental HCT116 cell lines from two different sources cluster tightly together. CTNNB1 wt cells and AKT1/2 KO cells cluster apart from the other cell lines, indicating that the KO of respective genes induces strong phenotypic main effects.

C Unsupervised clustering of the phenotypic chemical-genetic interaction profiles for all drugs on all 20 phenotypic features reveals that the parental HCT116 cell lines from two different sources cluster tightly together. KRAS wt cluster together with MEK1 KO and not with MEK2 KO cells, indicating the key role of MEK1 in KRAS signaling.

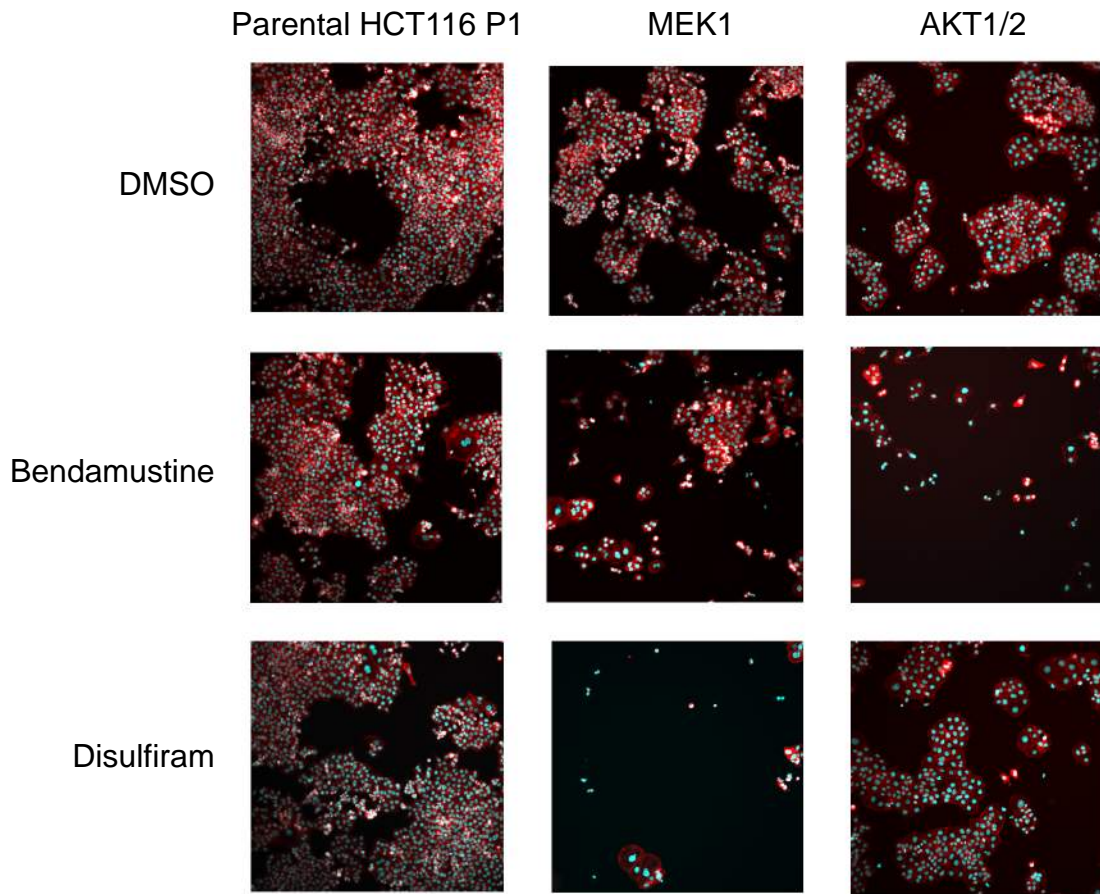

Appendix Figure S6. Synthetic lethal pharmacogenetic interactions. Bendamustine specifically impaired the growth of AKT1/2 KO cells. Disulfiram specifically impaired the growth of MEK1 KO cells. Actin = red, DNA = cyan.

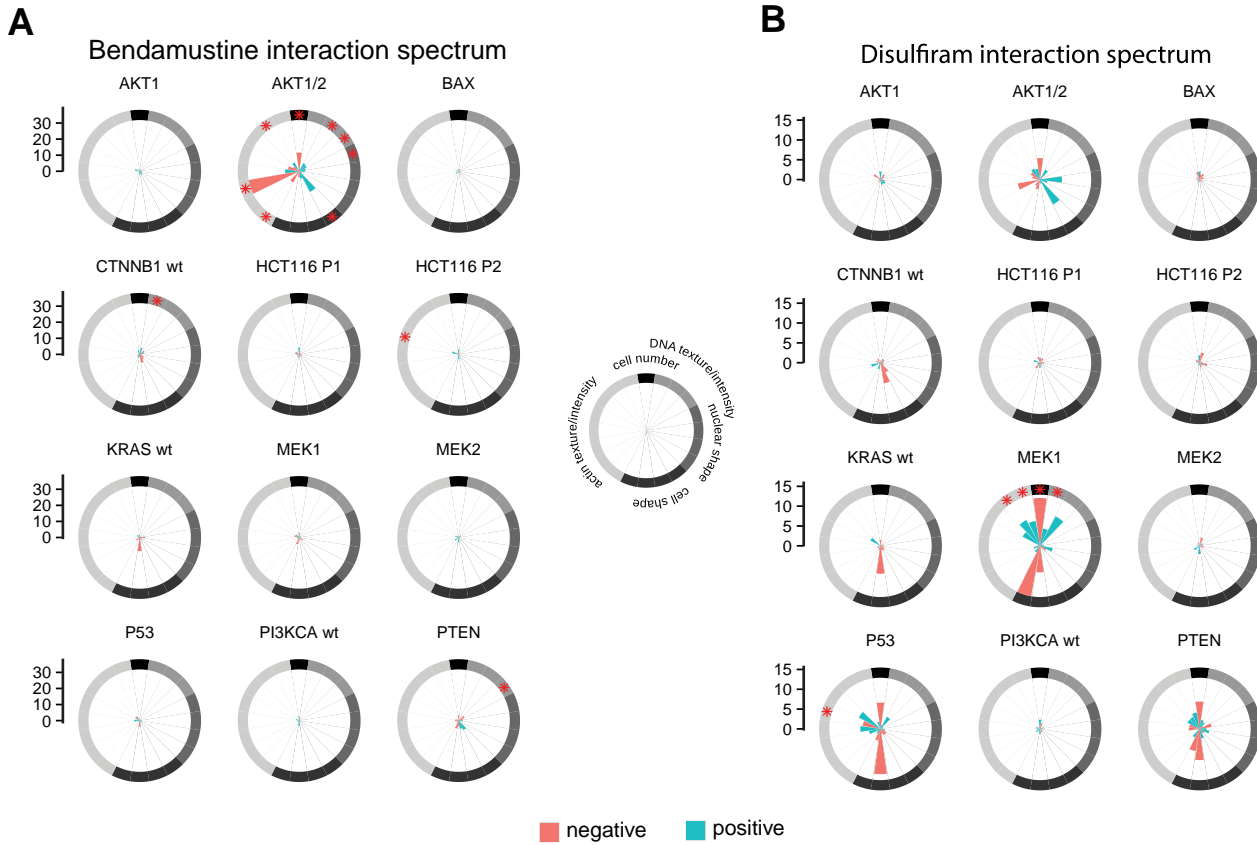

Appendix Figure S7. Bendamustine and disulfiram interaction spectrum.

A Bendamustine interaction spectrum. Bendamustine revealed chemical-genetic interactions across multiple phenotypic features including cell number in AKT1/2 double KO cells (highlighted in red).

B Disulfiram interaction spectrum. Disulfiram revealed chemical-genetic interactions across multiple phenotypic features, including cell number in MEK1 KO cells (highlighted in red). Phenotypic chemo-genomic interactions are shown unscaled which reveals that interactions are rare. Interactions are further categorized in positive and negative interactions according to the sign of interaction terms. \* adjusted p-value < 0.01.





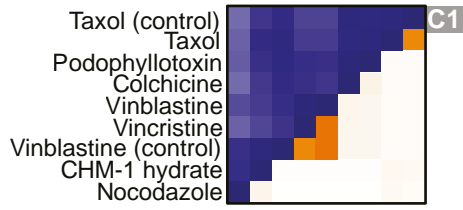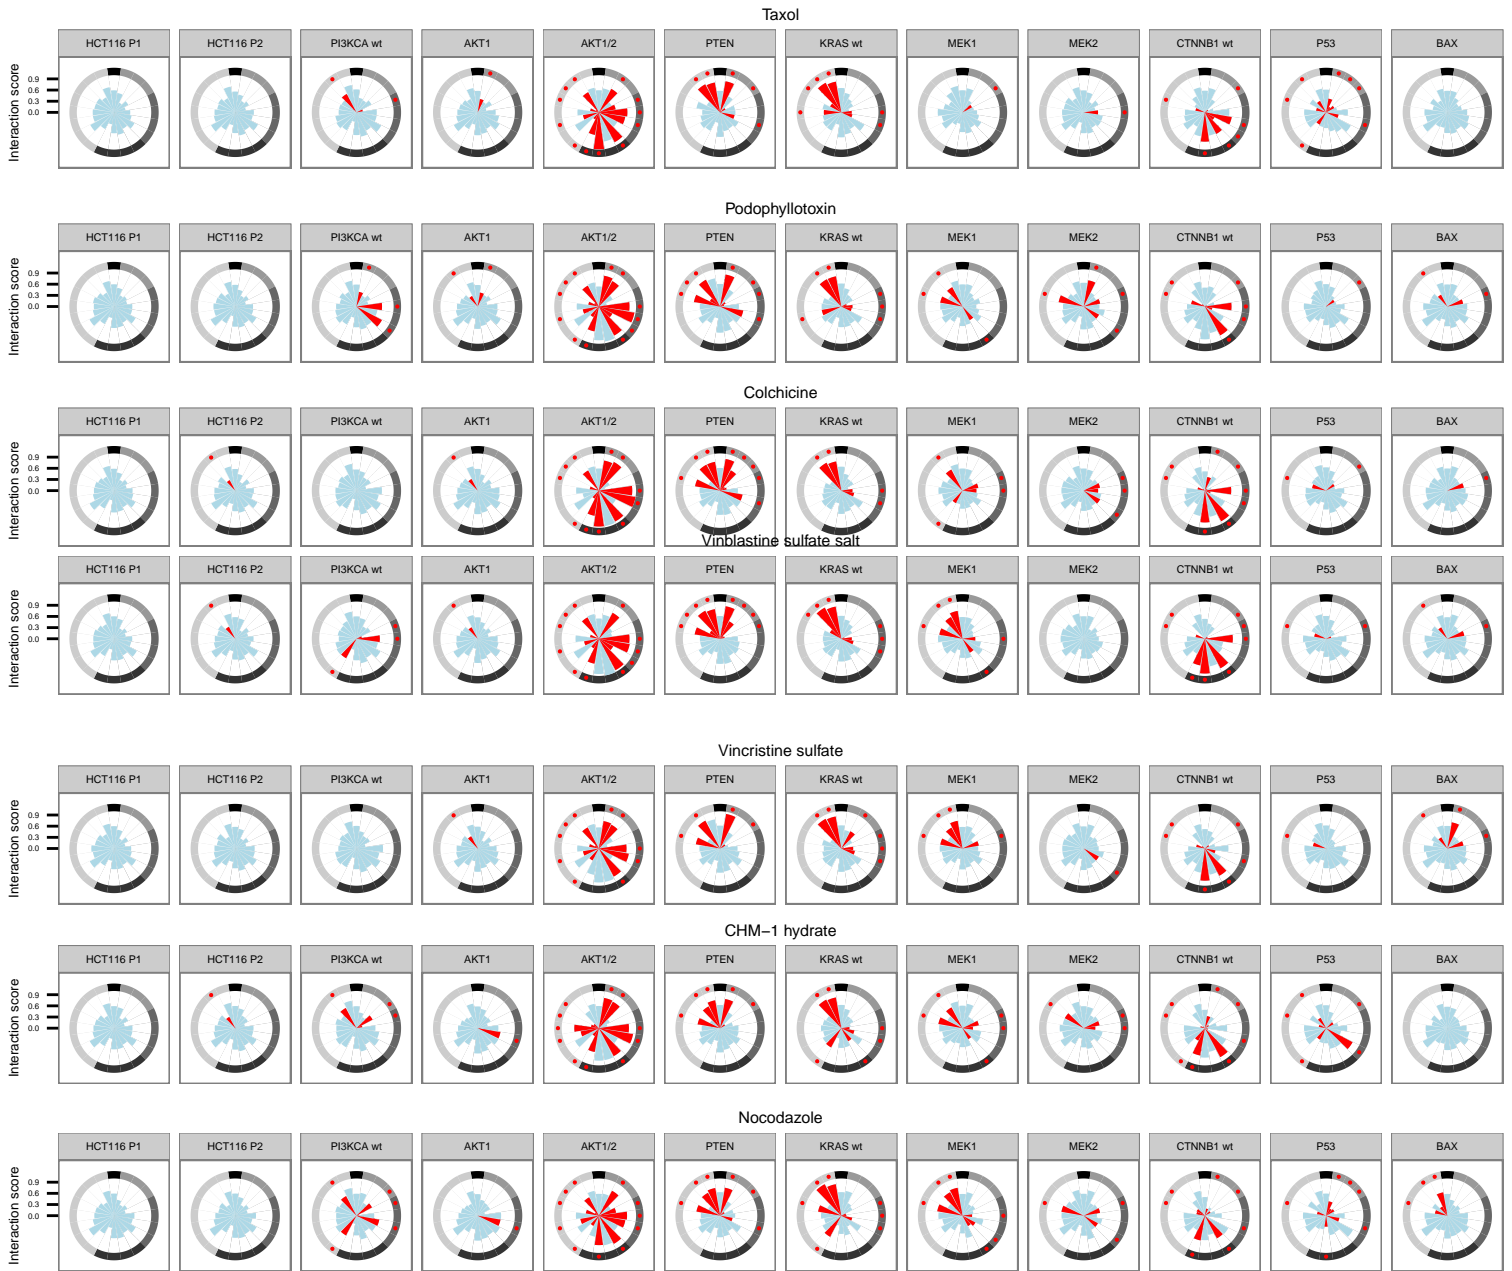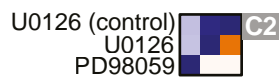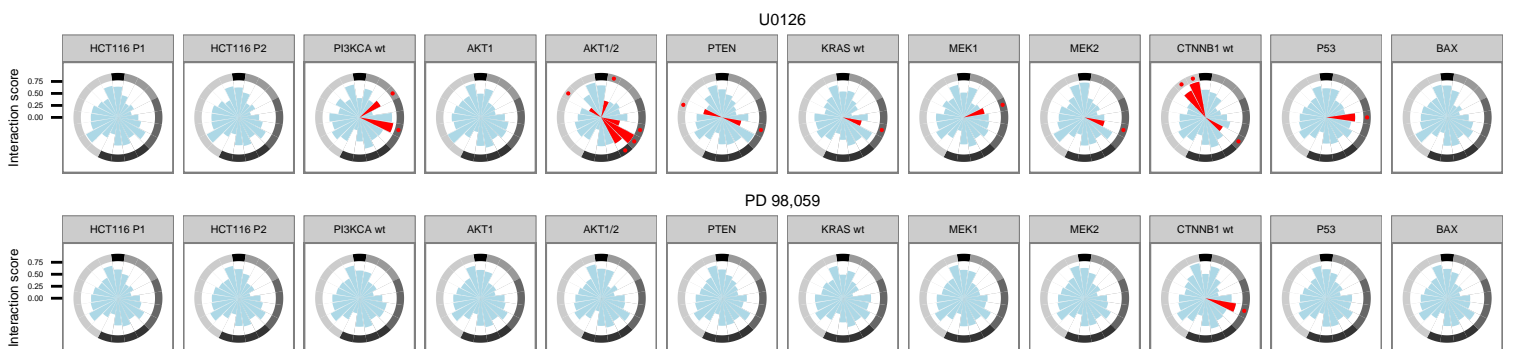

PD 169316   
SB 202190 

PD 169316

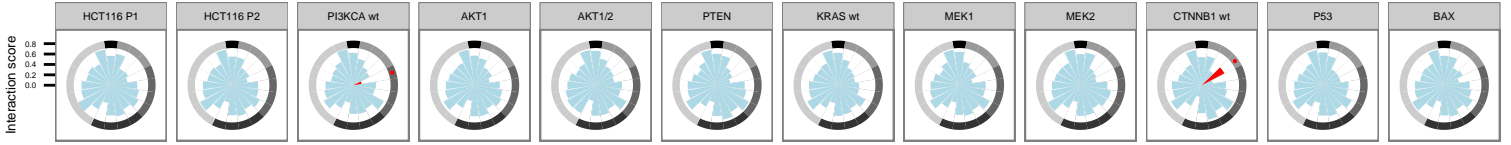

SB 202190

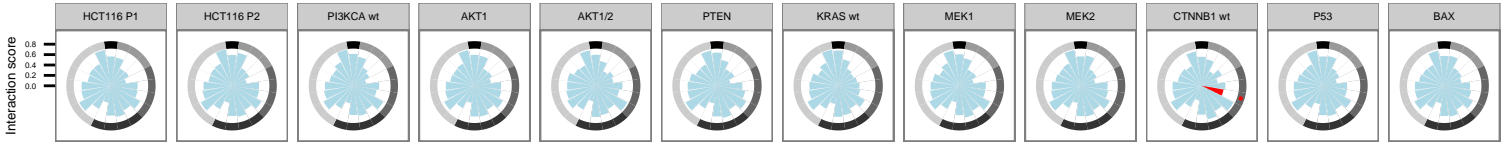

Betamethasone   
Beclomethasone 

Betamethasone

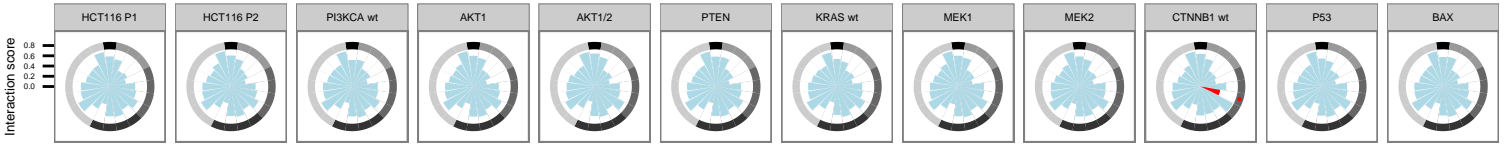

Beclomethasone

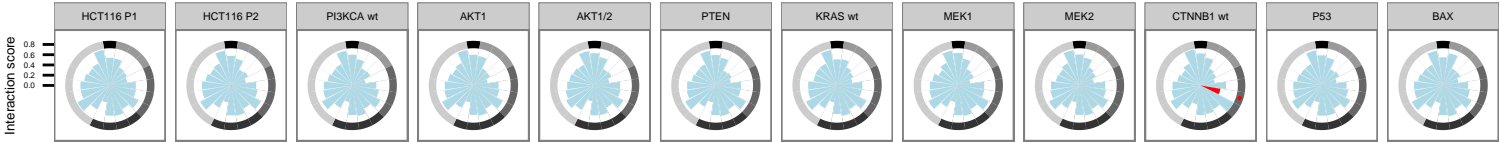

DMAT   
TBBz 

DMAT (CK2 Inhibitor 2)

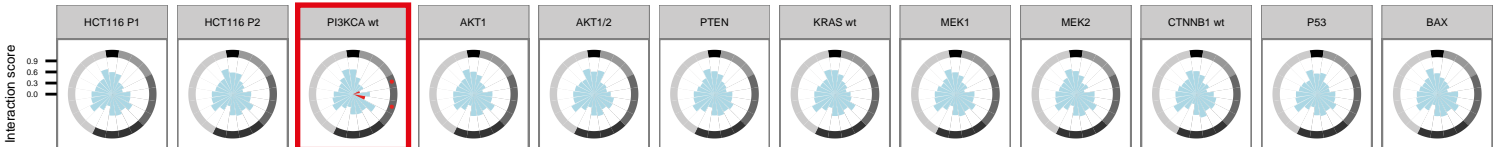

TBBz

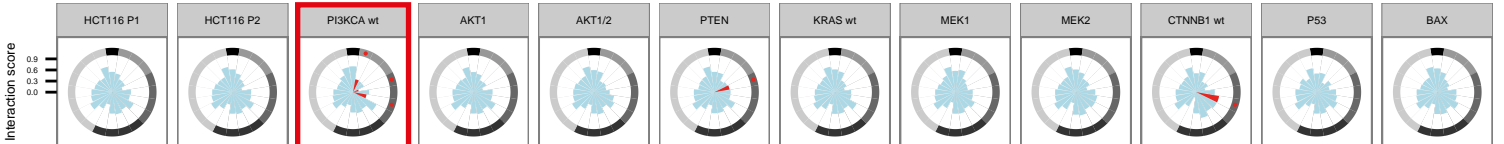

5'dFurd   
5-FU 

5-fluoro-5'-deoxyuridine

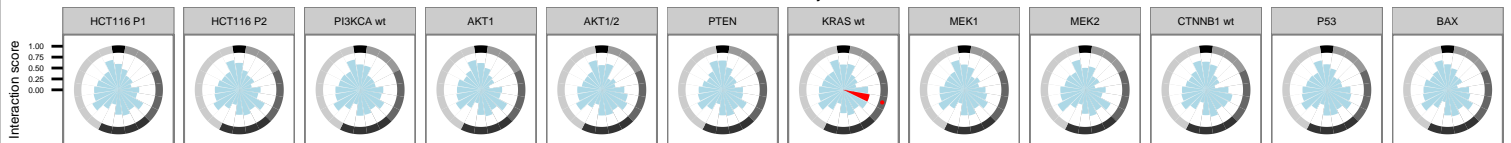

5-Fluorouracil

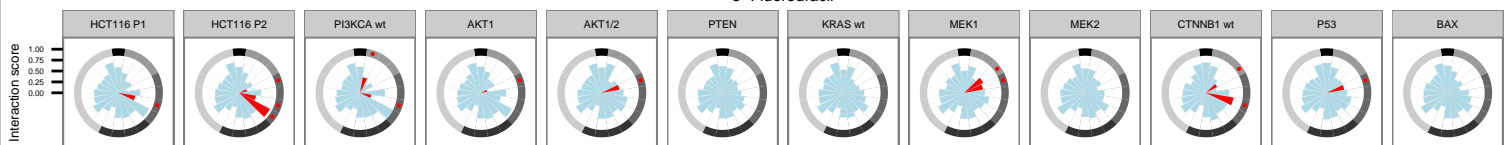

Etoposide  
Amsacrine  
NU2058  
Ara-C  
Cyclo-C

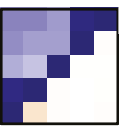

C7

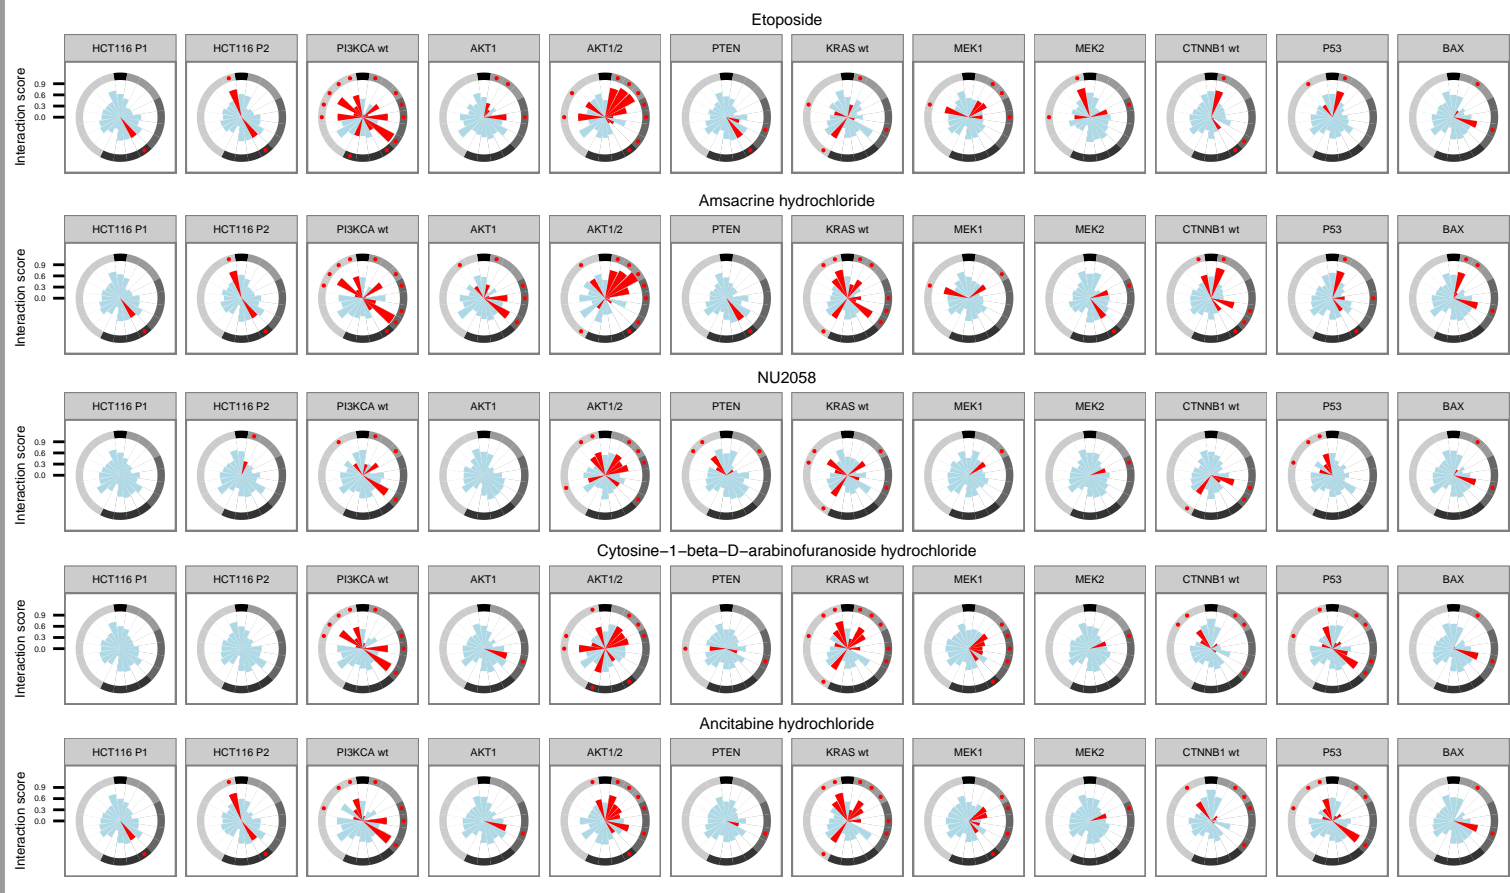

Mitoxantrone  
Camptothecin  
Thapsigargin  
Calcimycin



C8

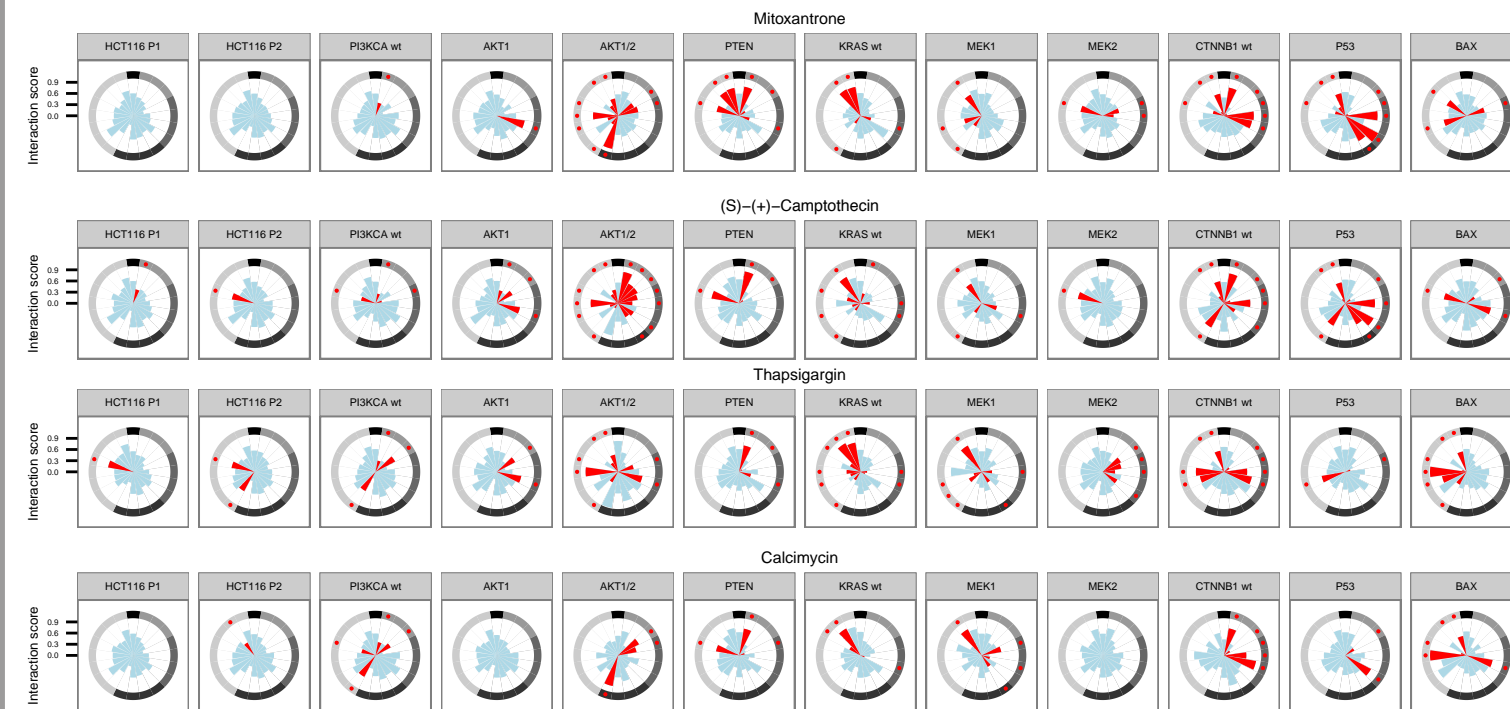

Carboplatin  
CB 1954

Carboplatin

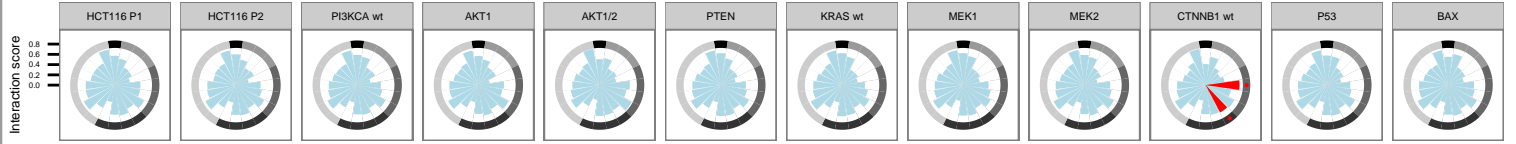

CB 1954

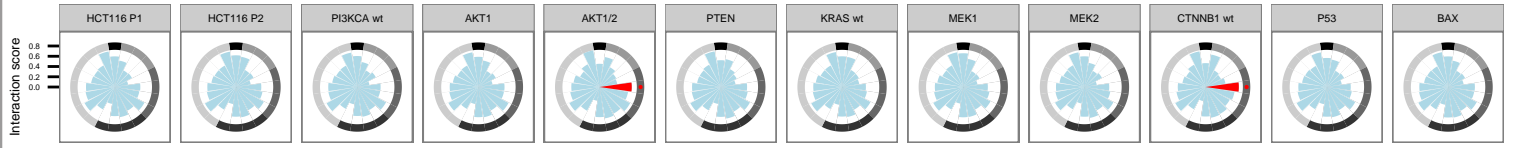

Bendamustine  
Iodoacetamide  
Pifithrin- $\mu$   
Parthenolide  
Supercinnamaldehyde

C10

Bendamustine hydrochloride

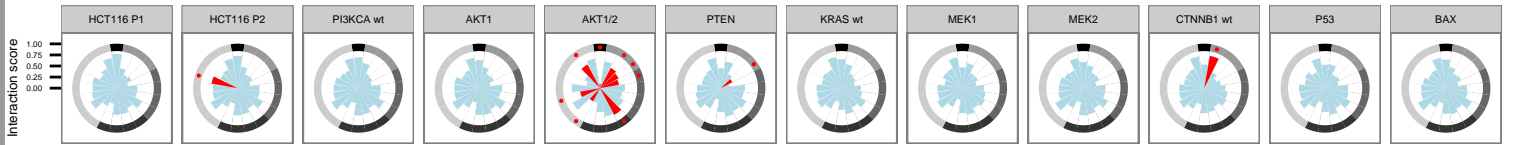

Iodoacetamide

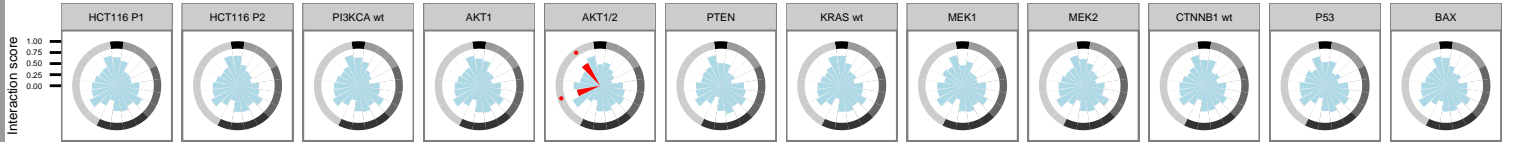

Pifithrin- $\mu$

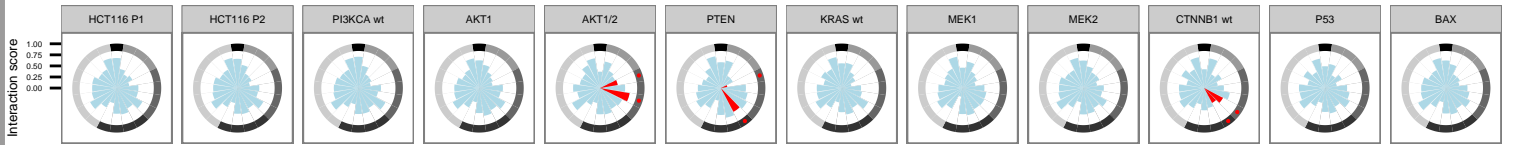

Parthenolide

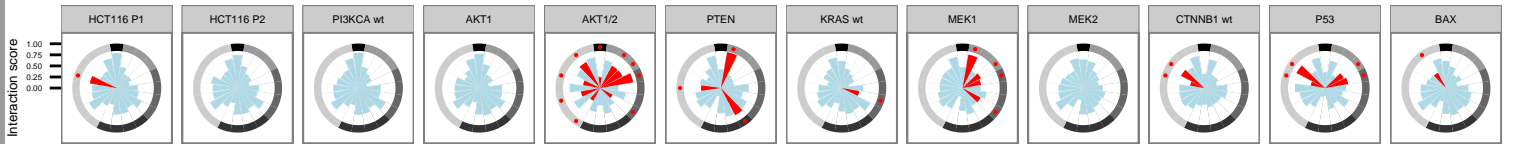

Supercinnamaldehyde

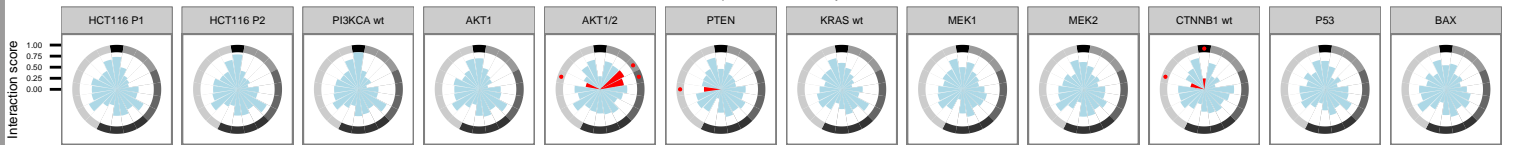

Ouabain  
Dihydro-Ouabain  
Brefeldin A 

Ouabain

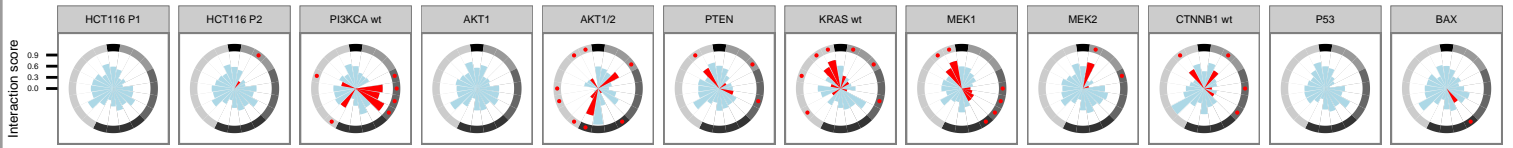

Dihydroouabain

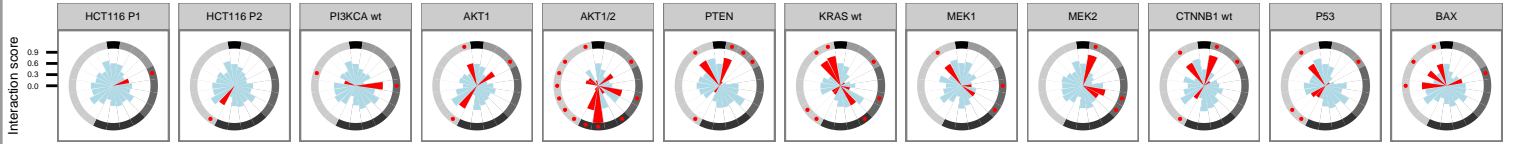

Brefeldin A from *Penicillium brefeldianum*

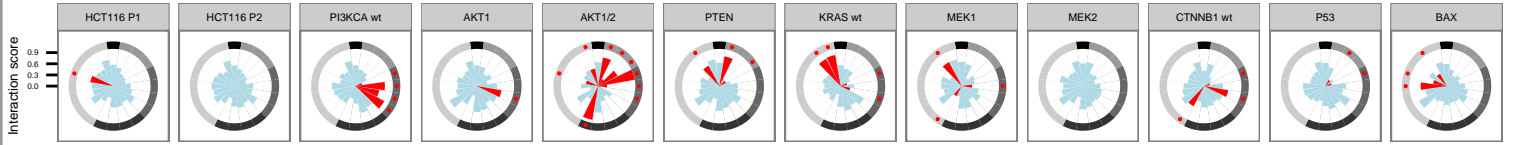

CGP-74514A  
Emetine  
NSC95397 

CGP-74514A hydrochloride

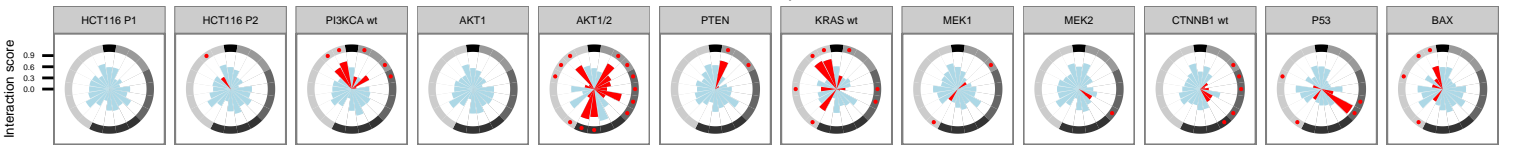

Emetine dihydrochloride hydrate

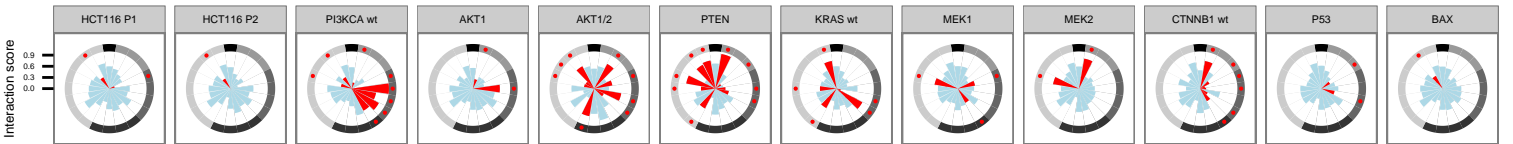

NSC 95397

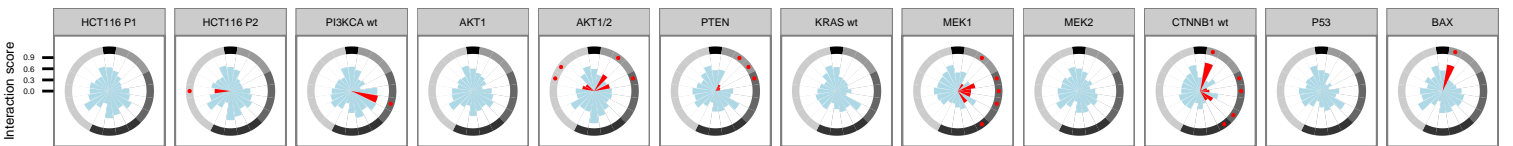

BAY 11-7082  
BAY 11-7085  
STATTIC 

Bay 11-7082

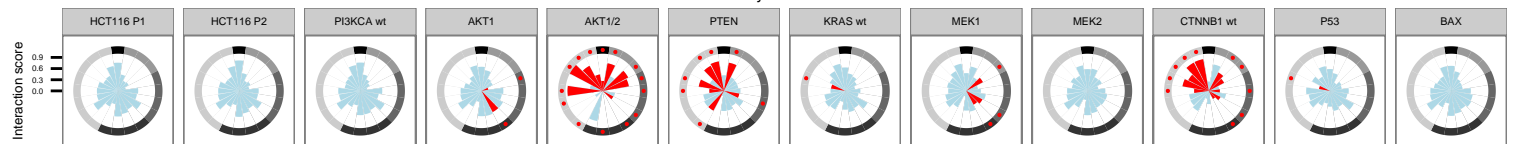

Bay 11-7085

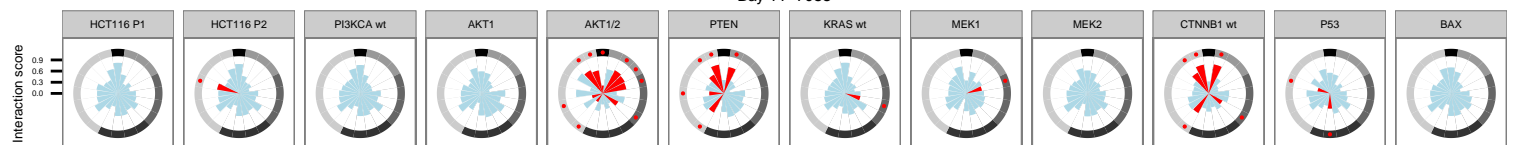

Static

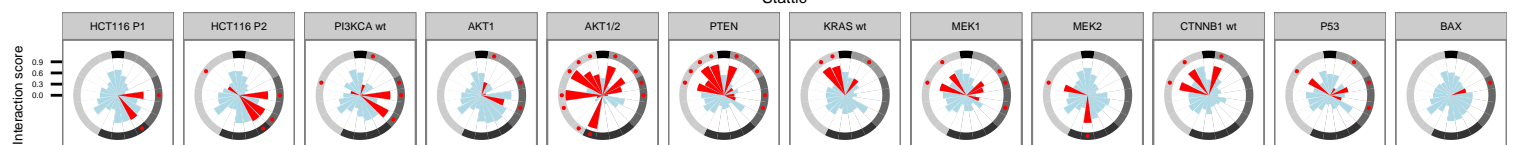

YC-1  C14  
 ARP 101 

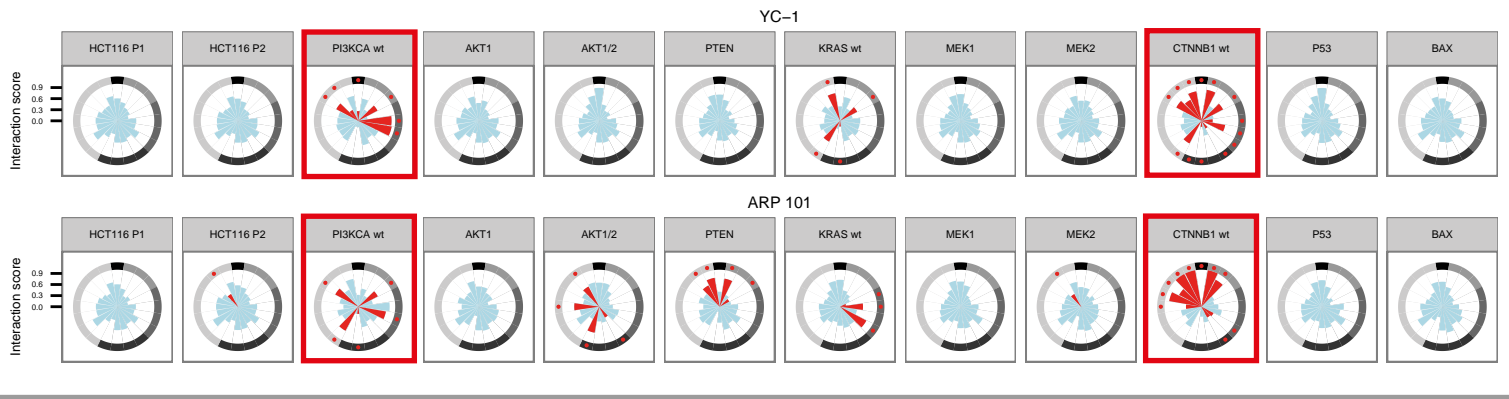

Cantharidic acid  C15  
 Cantharidin  BIO

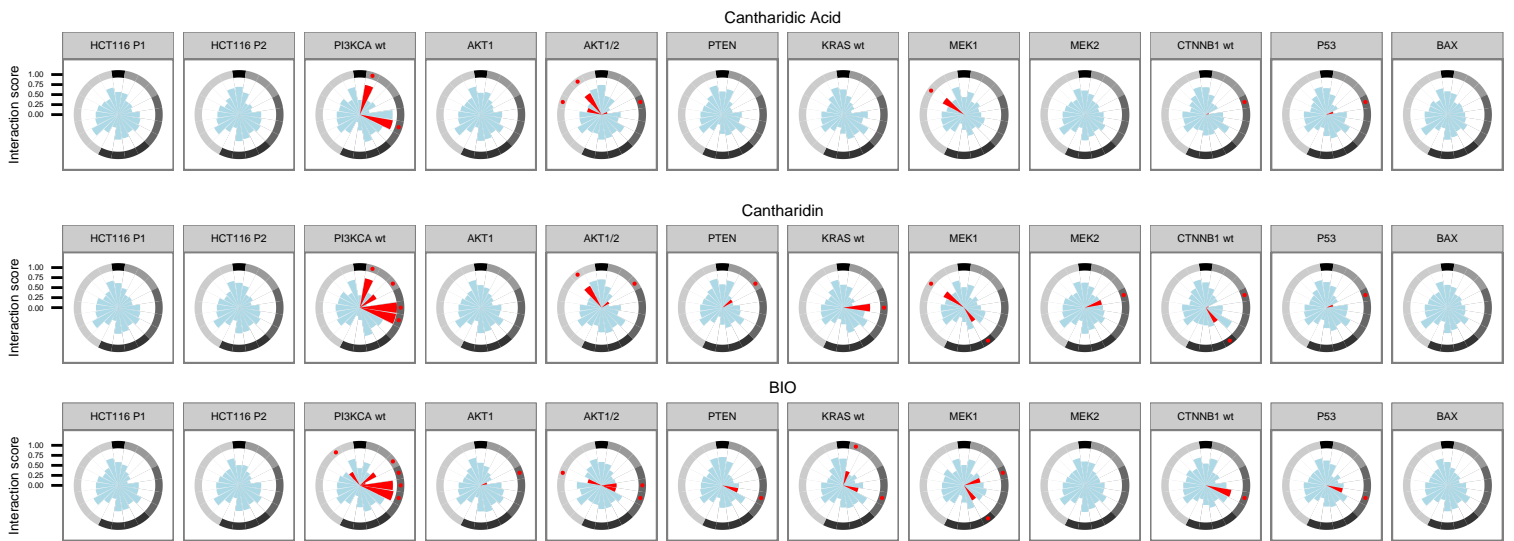

Phenanthroline  C16  
 5-Azacytidine  BIO  
 Aminopterin  BIO  
 Methotrexate 

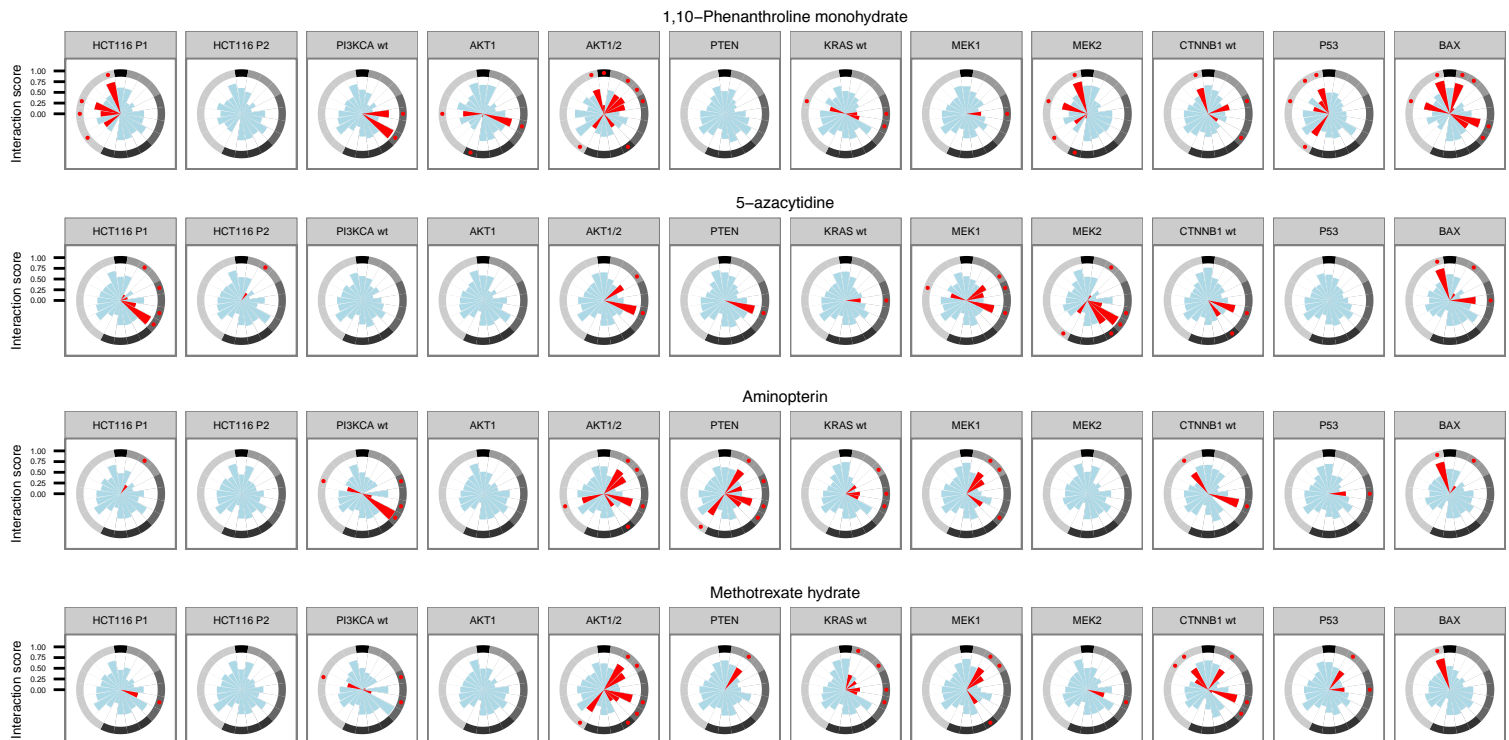

Rottlerin  
Niclosamide

C17

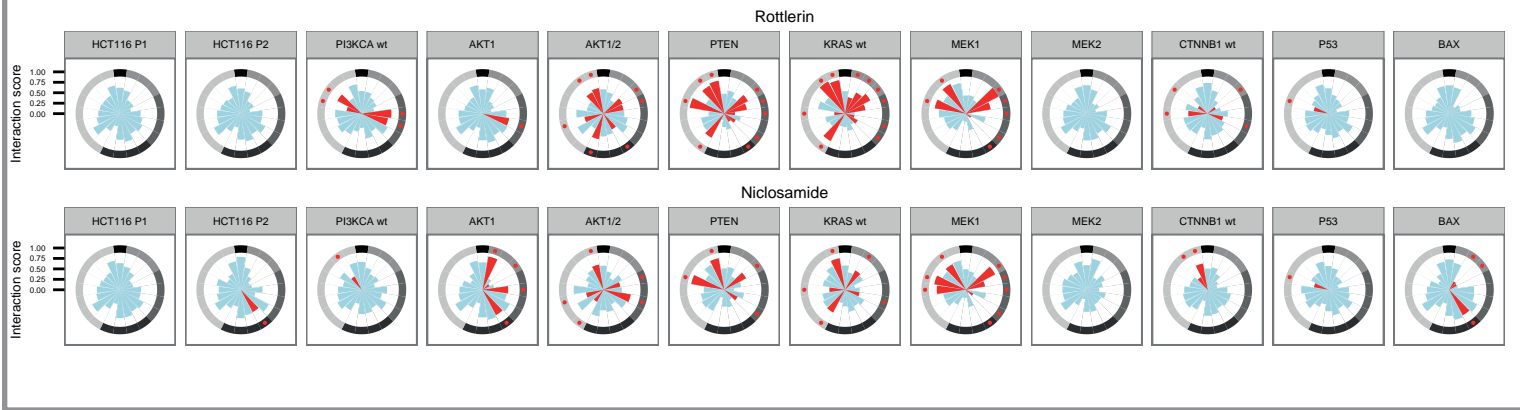

Disulfiram  
ZPCK  
Tyrphostin AG 555  
CAPE

C18

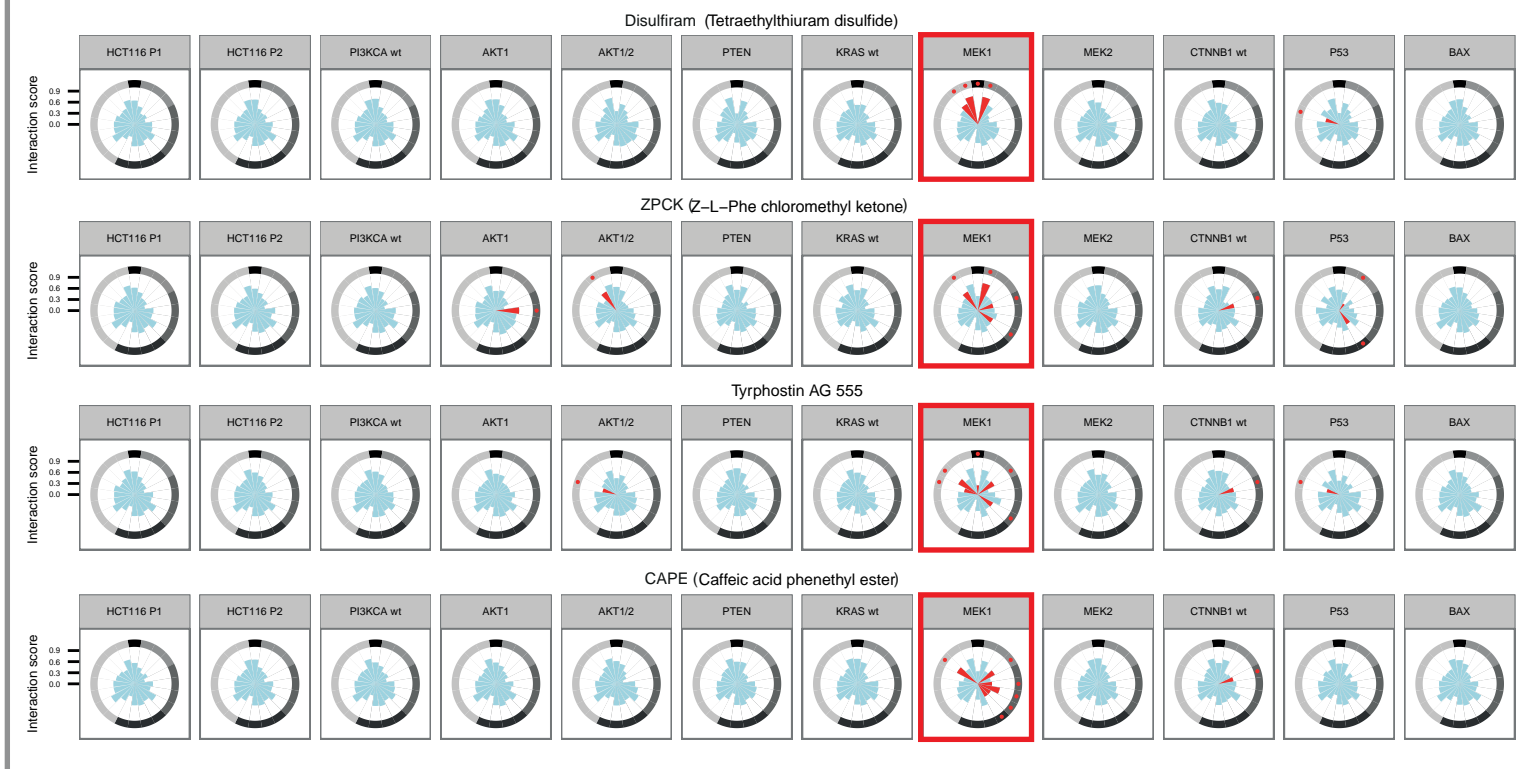

Appendix Figure S9. Association between clustering of compounds as shown in Fig 5A and respective interaction spectra for drugs within clusters.

While in some instances the similarity of drug profiles was a result of coordinated subtle covariation across multiple cell lines and phenotypes, in other cases it was driven by the similarity of distinctive phenotypes of individual cell lines.

For example, the CK2 inhibitors DMAT and TBBz (cluster C5) affected nuclear shape features specifically in cells with only the wildtype copy of PI3KCA (HCT116 PI3KCA wt +/- mt -).

The clustering of the compounds ARP101 and YC-1 in C15 was driven by their distinct phenotypes in cells with only the wildtype copies of CTNNB1 (HCT116 CTNNB1 wt +/- mt -) and PI3KCA (HCT116 PI3KCA wt +/- mt -).

The clustering of compounds in C18 was driven by distinctive interactions with MEK1 KO cells.



### Genotypes

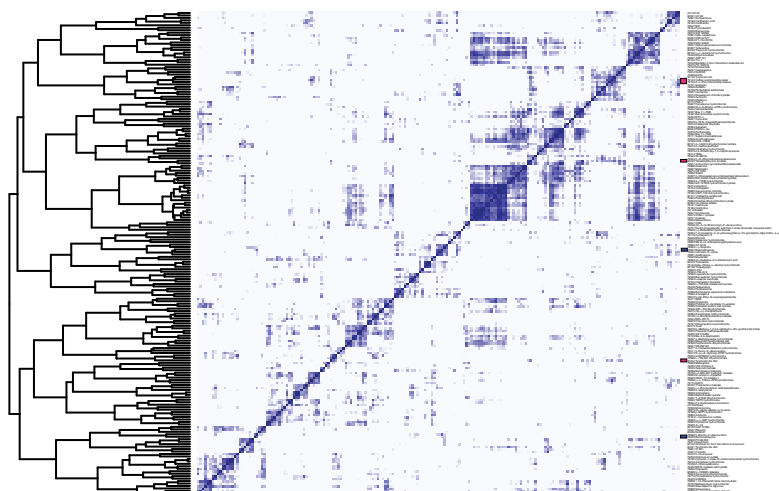

### Multiparametric phenotypes

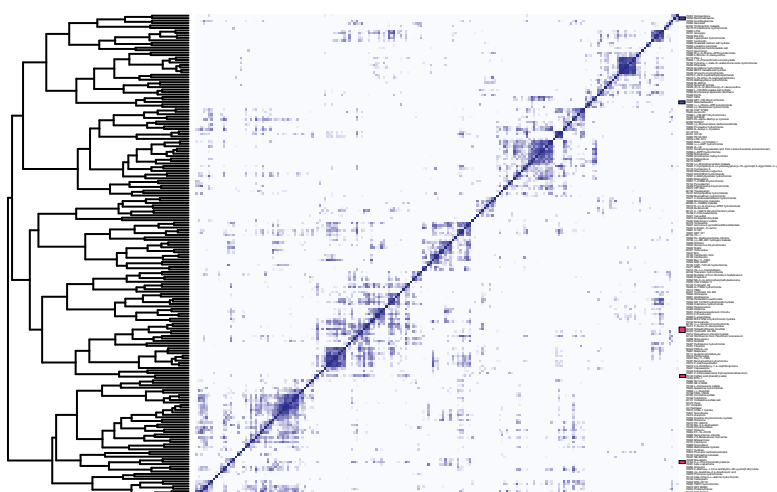

### Genotypes and multiparametric phenotypes

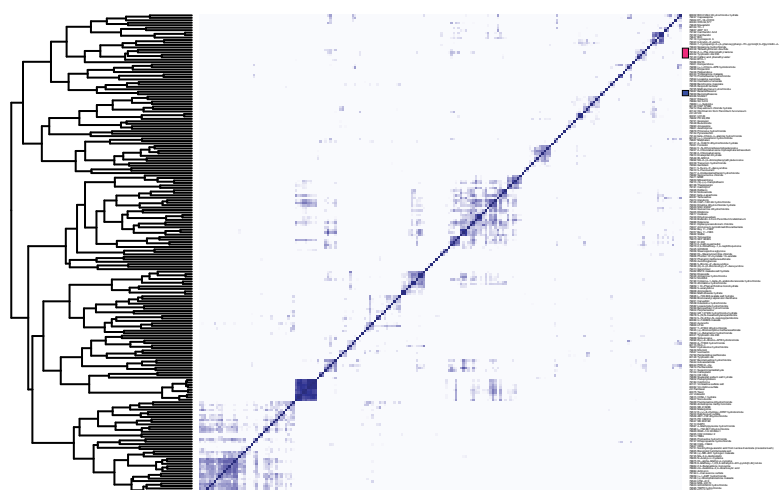

Appendix Figure S10. Integration of phenotypic profiling and chemical-genetic interaction mapping improves resolution.

Unsupervised clustering based on profile correlation using data only on cell number for all twelve genetic backgrounds screened (Genotype), using data from image-based phenotypes of one genetic background (parental HCT116; P2) (Multiparametric phenotypes), or using interaction profiles derived from both genetic backgrounds and image-based phenotypes (Genotypes and multiparametric phenotypes). Each heatmap is ordered based on individual clustering of respective datasets. Blue squares indicate compounds in cluster C4, red squares indicate compounds in cluster C18 (see Fig 5A). In contrast to the low-resolution obtained for genotype or multiparametric phenotype analysis, the combination of phenotypic profiling with chemical-genetic interaction mapping provides distinct high-resolution clusters.

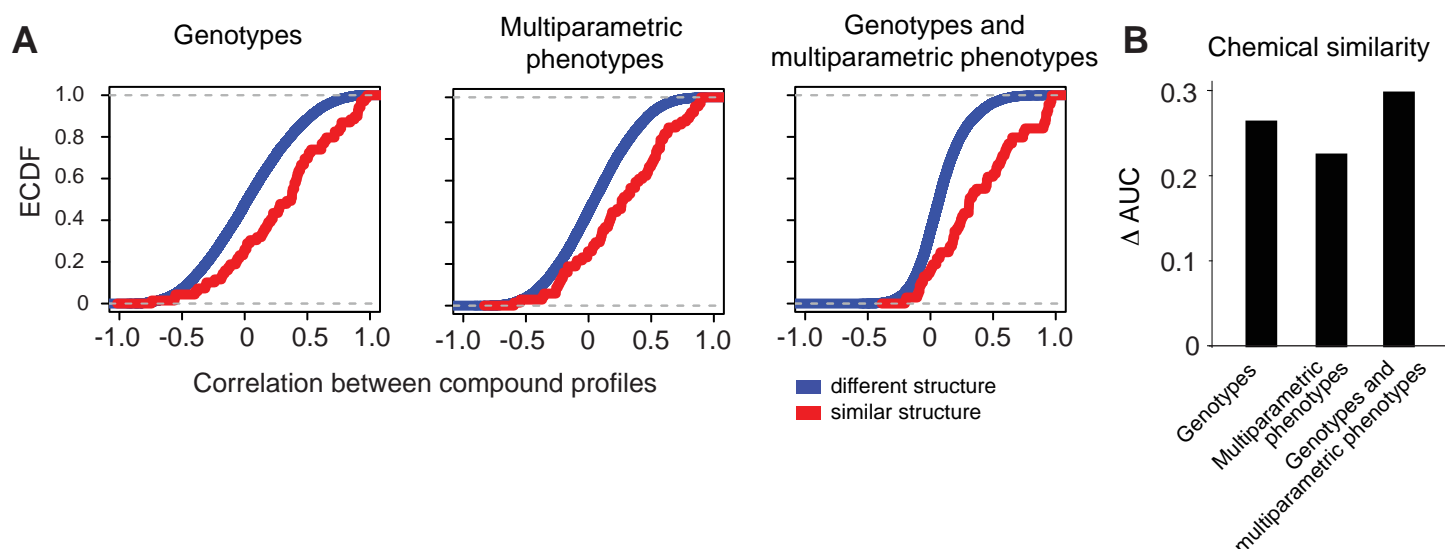

Appendix Figure S11. Image-based chemical-genetic interaction analyses outperforms other methods. A Compounds that share chemical similarity have a higher correlation of interaction profiles as compared to drugs that do not share chemical similarity, as indicated by the shift of the empirical cumulative density function (ECDF) for shared structures (red curve) compared to non-shared structures (blue curve). Genotype: data only on cell number using 12 genetic backgrounds; Multiparametric phenotypes: data using image-based phenotypes of one genetic background (parental HCT116; P2); Genotypes and multiparametric phenotypes: interaction profiles derived from both genetic backgrounds and image-based phenotypes. B Resolution index ( $\Delta$  AUC) which displays the performance with which each strategy separated drugs that share/do not chemical similarity is shown for aforementioned approaches (see methods for details).

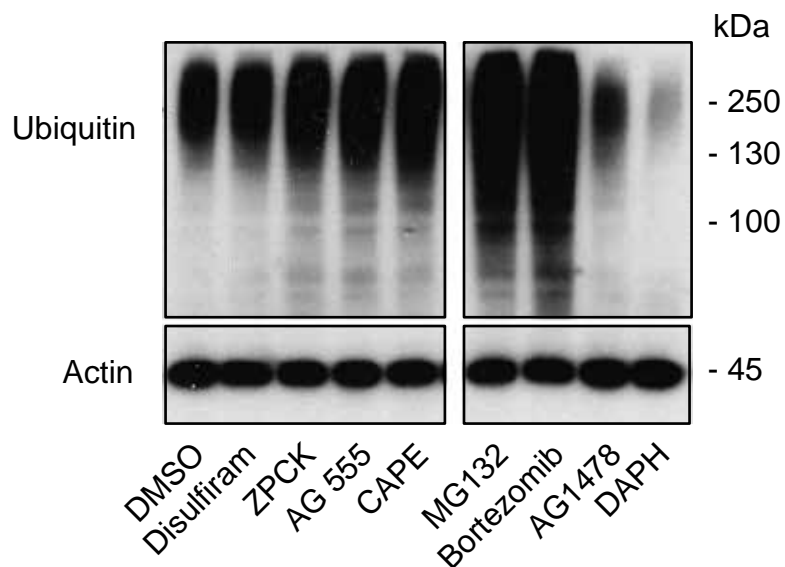

Appendix Figure S12. The EGFR inhibitor tyrphostin AG555 impairs proteasome function. Tyrphostin AG555 increases Ubiquitin abundance. Western blots of total ubiquitin levels after 24 h treatment with compounds at a concentration of 5  $\mu$ M in HCT116 cells. Tyrphostin AG555 increases the abundance of Ubiquitin, which indicates proteasome inhibition. The proteasome inhibitors MG132 and bortezomib served as positive controls. EGFR inhibitors AG1478 and DAPH did not increase the abundance of ubiquitin. Representative example of 4 independent experiments is shown.
